# Supplementary material for: Clinical validation of a next-generation sequencing-based multi-cancer early detection “liquid biopsy” blood test in over 1,000 dogs using an independent testing set: The CANcer Detection in Dogs (CANDiD) study
Source: PubMed Central journal article supplement (PMC9041869; doi:10.1371/journal.pone.0266623), 2022-04-26
Supplement: pone.0266623.s003.pdf [file pone.0266623.s003.pdf]

**S2 Table. Cancer types and subtypes evaluated in the CANDiD study**

| <b>Cancer Types: Simplified Classification</b> | <b>Cancer Subtypes: Detailed Classification</b>                      |
|------------------------------------------------|----------------------------------------------------------------------|
| Abdominal Cavity                               | Abdominal cavity tumor malignant: carcinoma                          |
| Adrenal Gland                                  | Adrenal tumor malignant: adrenocortical carcinoma                    |
| Anal Sac                                       | Anal sac adenocarcinoma                                              |
| Bile Duct                                      | Bile duct tumor malignant: cholangiocellular carcinoma               |
| Bone, Fibrosarcoma                             | Bone sarcoma: fibrosarcoma (appendicular)                            |
| Bone, Multilobular Osteochondrosarcoma         | Bone sarcoma: multilobular osteochondrosarcoma of skull              |
| Bone, Osteosarcoma                             | Bone sarcoma: osteosarcoma (appendicular)                            |
|                                                | Bone sarcoma: osteosarcoma (axial)                                   |
| Brain                                          | Brain tumor unspecified type                                         |
| Chondrosarcoma                                 | Cartilage sarcoma: chondrosarcoma (axial)                            |
| Ear Canal                                      | Ear canal tumor: ceruminous adenocarcinoma                           |
| Stomach                                        | Gastric tumor malignant: leiomyosarcoma                              |
| Heart Base                                     | Heart base tumor                                                     |
| Hemangiosarcoma                                | Hemangiosarcoma: cardiac hemangiosarcoma                             |
|                                                | Hemangiosarcoma: abdominal visceral organ hemangiosarcoma            |
|                                                | Hemangiosarcoma: skin / subcutaneous / intramuscular hemangiosarcoma |
| Liver                                          | Hepatic tumor malignant: hepatocellular carcinoma                    |
| Histiocytic Sarcoma                            | Histiocytic sarcoma: disseminated histiocytic sarcoma                |
|                                                | Histiocytic sarcoma: localized histiocytic sarcoma                   |
| Large intestine                                | Intestinal tumor malignant: gastrointestinal stromal tumor           |
| Leukemia, Acute Lymphoid (ALL)                 | Lymphoid leukemia: acute lymphoid leukemia                           |
| Leukemia, Chronic Lymphoid (CLL)               | Lymphoid leukemia: chronic lymphoid leukemia                         |
| Lymphoma, Indolent                             | Lymphoma, indolent: small cell lymphoma                              |
|                                                | Lymphoma, indolent: T zone lymphoma                                  |
| Lymphoma, Intermediate to Large Cell           | Lymphoma: cutaneous lymphoma                                         |
|                                                | Lymphoma: gastrointestinal lymphoma                                  |
|                                                | Lymphoma: hepatosplenic lymphoma                                     |
|                                                | Lymphoma: multicentric lymphoma                                      |
|                                                | Lymphoma: nasal lymphoma                                             |
| Malignant Melanoma                             | Malignant melanoma: anal sac melanoma                                |
|                                                | Malignant melanoma: cutaneous melanoma                               |
|                                                | Malignant melanoma: oral melanoma                                    |
|                                                | Malignant melanoma: unguial melanoma                                 |
| Mammary Gland Carcinoma                        | Mammary gland tumor malignant: mammary gland carcinoma               |
| Mast Cell Tumor                                | Mast cell tumor: abdominal visceral organ mast cell tumor            |
|                                                | Mast cell tumor: cutaneous mast cell tumor                           |
|                                                | Mast cell tumor: intestinal mast cell tumor                          |
|                                                | Mast cell tumor: intramuscular mast cell tumor                       |
|                                                | Mast cell tumor: mucocutaneous mast cell tumor                       |
|                                                | Mast cell tumor: nasal cavity mast cell tumor                        |
|                                                | Mast cell tumor: nasal planum mast cell tumor                        |
|                                                | Mast cell tumor: oral mast cell tumor                                |
|                                                | Mast cell tumor: subcutaneous mast cell tumor                        |
| Multiple Myeloma                               | Multiple myeloma                                                     |

**S2 Table. Cancer types and subtypes evaluated in the CANDiD study (continued)**

| <b>Cancer Types: Simplified Classification</b> | <b>Cancer Subtypes: Detailed Classification</b>                 |
|------------------------------------------------|-----------------------------------------------------------------|
| Nasal Cavity and Paranasal Sinuses             | Nasal cavity and paranasal sinus tumor: adenocarcinoma          |
|                                                | Nasal cavity and paranasal sinus tumor: carcinoma               |
|                                                | Nasal cavity and paranasal sinus tumor: chondrosarcoma          |
|                                                | Nasal cavity and paranasal sinus tumor: plasma cell tumor       |
|                                                | Nasal cavity and paranasal sinus tumor: sarcoma                 |
|                                                | Nasal cavity and paranasal sinus tumor: squamous cell carcinoma |
| Nasal Planum                                   | Nasal planum tumor: squamous cell carcinoma                     |
| Peripheral Nerve Sheath                        | Nervous system tumor: peripheral nerve sheath tumor             |
| Oral Cavity                                    | Oral tumor: acanthomatous ameloblastoma                         |
|                                                | Oral tumor: fibrosarcoma                                        |
|                                                | Oral tumor: osteosarcoma                                        |
|                                                | Oral tumor: plasma cell tumor                                   |
|                                                | Oral tumor: sarcoma                                             |
|                                                | Oral tumor: squamous cell carcinoma                             |
| Ovary                                          | Ovarian tumor: granulosa cell tumor                             |
| Pancreas, Endocrine                            | Pancreatic tumor: insulinoma                                    |
| Pituitary                                      | Pituitary tumor: macroadenoma                                   |
| Prostate                                       | Prostatic tumor: carcinoma                                      |
|                                                | Prostatic tumor: transitional cell carcinoma                    |
| Lung                                           | Pulmonary tumor malignant: adenocarcinoma                       |
|                                                | Pulmonary tumor malignant: carcinoma                            |
|                                                | Pulmonary tumor malignant: sarcoma                              |
| Kidney                                         | Renal tumor: papillary carcinoma                                |
| Salivary Gland                                 | Salivary gland tumor: adenocarcinoma                            |
| Skin                                           | Skin tumor malignant: adenocarcinoma                            |
|                                                | Skin tumor malignant: apocrine sweat gland adenocarcinoma       |
|                                                | Skin tumor malignant: basal cell carcinoma                      |
|                                                | Skin tumor malignant: carcinoma                                 |
|                                                | Skin tumor malignant: sebaceous adenocarcinoma                  |
|                                                | Skin tumor malignant: squamous cell carcinoma                   |
| Soft Tissue Sarcoma                            | Soft tissue sarcoma of abdominal visceral organs                |
|                                                | Soft tissue sarcoma of the head and neck                        |
|                                                | Soft tissue sarcoma of the trunk and extremities                |
| Spinal Cord                                    | Spinal cord tumor: meningioma                                   |
| Thymoma                                        | Thymoma                                                         |
| Thyroid                                        | Thyroid tumor: carcinoma                                        |
| Transmissible Venereal Tumor                   | Transmissible venereal tumor                                    |
| Urinary Bladder / Urethra                      | Urinary bladder / urethral tumor: transitional cell carcinoma   |

*Cancer-diagnosed subjects enrolled in the CANDiD Study were assigned to one of 42 cancer types listed in the left column, based primarily on anatomic location; this simplified classification was adapted from Withrow and MacEwen's Small Animal Clinical Oncology (Sixth Edition) and from the American Joint Committee on Cancer (AJCC ) Manual (Eighth Edition). This list was used to derive detection rates by cancer type across the training and the testing sets.*

*This simplified list was derived from a more detailed list of 82 cancer subtypes listed in the right column, which were additionally defined based on anatomic sub-location and/or histology.*

*This table shows the correspondence between the simplified classification and the detailed classification.*
