# Supplementary material for: Clinical validation of a next-generation sequencing-based multi-cancer early detection “liquid biopsy” blood test in over 1,000 dogs using an independent testing set: The CANcer Detection in Dogs (CANDiD) study
Source: PubMed Central journal article supplement (PMC9041869; doi:10.1371/journal.pone.0266623), 2022-04-26
Supplement: pone.0266623.s004.pdf [file pone.0266623.s004.pdf]

**S3 Table. Analysis of test sensitivity based on demographic characteristics of cancer-diagnosed subjects in the testing set**

|               | <b>Characteristic</b>    | <b>Test sensitivity</b> | <b>p-value</b> |
|---------------|--------------------------|-------------------------|----------------|
| <b>Age</b>    | Median<br>9.7 years      |                         | 0.6187         |
|               | ≥9.7 years<br>n=177      | 53.1%                   |                |
|               | <9.7 years<br>n=174      | 56.3%                   |                |
| <b>Weight</b> | Median<br>29.7kg         |                         | 0.2624         |
|               | ≥29.7kg<br>n=176         | 58.0%                   |                |
|               | <29.7kg<br>n=175         | 51.4%                   |                |
| <b>Sex</b>    | Male (Neutered)<br>n=167 | 59.9%                   | 0.2424         |
|               | Male (Intact)<br>n=22    | 50.0%                   |                |
|               | Female (Spayed)<br>n=150 | 51.3%                   |                |
|               | Female (Intact)<br>n=11  | 36.3%                   |                |
| <b>Breed</b>  | Purebred<br>n=174        | 55.2%                   | 0.9452         |
|               | Mixed-breed<br>n=177     | 54.2%                   |                |

*Note: Neuter status not provided for one male.*

*Chi-squared test was used to evaluate significance across multiple groups.*
