# Supplementary material for: Clinical validation of a next-generation sequencing-based multi-cancer early detection “liquid biopsy” blood test in over 1,000 dogs using an independent testing set: The CANcer Detection in Dogs (CANDiD) study
Source: PubMed Central journal article supplement (PMC9041869; doi:10.1371/journal.pone.0266623), 2022-04-26
Supplement: pone.0266623.s005.pdf [file pone.0266623.s005.pdf]

**S4 Table. Overview of the putative false positive subjects from the testing set of the CANDiD study**

| Subject | Age at blood collection (years) | Sex | Breed                      | Blood collection | Liquid biopsy result reported | Cancer workup initiated <sup>#</sup> | Cancer diagnosed | Clinical details                                                                                                                                                                                         |
|---------|---------------------------------|-----|----------------------------|------------------|-------------------------------|--------------------------------------|------------------|----------------------------------------------------------------------------------------------------------------------------------------------------------------------------------------------------------|
| 0374*   | 7                               | FS  | Mixed                      | Dec 2020         | Apr 2021                      | May 2021                             | May 2021         | Diagnosed with metastatic cardiac hemangiosarcoma; no clinical signs at diagnosis. Euthanized Aug 2021 after developing clinical signs.                                                                  |
| 0148**  | 9                               | MN  | Rough Collie               | Jan 2020         | Apr 2021                      | Aug 2021                             | Aug 2021         | Diagnosed with B-cell lymphoma on a normal-sized popliteal lymph node, intra-abdominal lymph node, and spleen by PARR; died of unrelated causes (suspected aspiration pneumonia) Aug 2021.               |
| 0009    | 11                              | MN  | Mixed                      | Nov 2019         | Apr 2021                      | N/A                                  | N/A              | Patient was being managed for progressive neuropathy; euthanized May 2020. No known diagnosis of cancer.                                                                                                 |
| 0176    | 12                              | FS  | Mixed                      | Feb 2020         | April 2021                    | N/A                                  | N/A              | Patient was being managed for chronic kidney disease; died in her sleep Apr 2021. No known diagnosis of cancer.                                                                                          |
| 0334    | 8                               | FS  | Mixed                      | Feb 2020         | Nov 2021                      | N/A                                  | N/A              | Patient was being managed for chronic kidney disease. No evidence of cancer on imaging Aug 2020 (abdominal ultrasound) and Sep 2021 (thoracic radiographs). Died Oct 2021. No known diagnosis of cancer. |
| 0442    | 14                              | FS  | Mixed                      | Feb 2020         | Apr 2021                      | N/A                                  | N/A              | Patient was being managed for GI signs; died May 2021. No known diagnosis of cancer.                                                                                                                     |
| 0153*** | 3                               | MI  | German Shorthaired Pointer | Mar 2020         | Nov 2021                      | Nov 2021                             | N/A              | No evidence of cancer on workup. FNA cytology of two subcutaneous masses revealed inflammation and fibroplasia.                                                                                          |
| 0326*** | 1                               | MN  | Mixed                      | Mar 2020         | Nov 2021                      | Nov 2021                             | N/A              | No evidence of cancer on workup.                                                                                                                                                                         |
| 0383*** | 5                               | MN  | Boxer                      | Mar 2020         | Nov 2021                      | Nov 2021                             | N/A              | No evidence of cancer on workup. Two masses noted Nov 2021; histopathology consistent with peripheral odontogenic fibroma, and cutaneous fibrolipoma.                                                    |
| 0735*** | 2                               | FI  | Labrador Retriever         | Apr 2021         | Nov 2021                      | Nov 2021                             | N/A              | No evidence of cancer on workup.                                                                                                                                                                         |

<sup>#</sup> Cancer workup included physical exam (including oral and rectal exam), routine lab work (CBC, chemistry, urinalysis), three-view thoracic radiographs, abdominal ultrasound, and FNA cytology of any observed masses or enlarged lymph nodes.

\* Described as a case study in the manuscript, see Figure 4.

\*\* Additional clinical details provided in the manuscript.

\*\*\* These subjects continue to be monitored for evidence of cancer.
