# Supplementary material for: Clinical validation of a next-generation sequencing-based multi-cancer early detection “liquid biopsy” blood test in over 1,000 dogs using an independent testing set: The CANcer Detection in Dogs (CANDiD) study
Source: PubMed Central journal article supplement (PMC9041869; doi:10.1371/journal.pone.0266623), 2022-04-26
Supplement: pone.0266623.s006.pdf [file pone.0266623.s006.pdf]

**S5 Table. Subjects with confirmed diagnoses of multiple concurrent primary cancers in the training and testing sets (n=16)**

| Subject | Cancer types present in each subject                            | Test result                       |
|---------|-----------------------------------------------------------------|-----------------------------------|
| MP-01   | Anal Sac<br>Histiocytic Sarcoma                                 | <i>Cancer Signal Detected</i>     |
| MP-02   | Lymphoma, Indolent<br>Lymphoma, Intermediate to Large Cell      |                                   |
| MP-03   | Lymphoma, Intermediate to Large Cell<br>Urinary Bladder/Urethra |                                   |
| MP-04   | Hemangiosarcoma<br>Thyroid                                      |                                   |
| MP-05   | Hemangiosarcoma<br>Urinary Bladder/Urethra                      |                                   |
| MP-06   | Leukemia, Chronic Lymphoid (CLL)<br>Mast Cell Tumor             |                                   |
| MP-07   | Hemangiosarcoma<br>Stomach                                      |                                   |
| MP-08   | Hemangiosarcoma<br>Soft Tissue Sarcoma                          |                                   |
| MP-09   | Anal Sac<br>Mammary Gland Carcinoma                             | <i>Cancer Signal Not Detected</i> |
| MP-10   | Malignant Melanoma<br>Soft Tissue Sarcoma                       |                                   |
| MP-11   | Oral Cavity<br>Urinary Bladder/Urethra                          |                                   |
| MP-12   | Mast Cell Tumor<br>Soft Tissue Sarcoma                          |                                   |
| MP-13   | Mast Cell Tumor (Skin)<br>Mast Cell Tumor (Subcutaneous)        |                                   |
| MP-14   | Nasal Cavity and Paranasal Sinuses<br>Oral Cavity               |                                   |
| MP-15   | Anal Sac<br>Bone, Osteosarcoma                                  |                                   |
| MP-16   | Mammary Gland Carcinoma<br>Ovary                                |                                   |

MP = multiple primary
