# Supplementary material for: Clinical validation of a next-generation sequencing-based multi-cancer early detection “liquid biopsy” blood test in over 1,000 dogs using an independent testing set: The CANcer Detection in Dogs (CANDiD) study
Source: PubMed Central journal article supplement (PMC9041869; doi:10.1371/journal.pone.0266623), 2022-04-26
Supplement: pone.0266623.s007.pdf [file pone.0266623.s007.pdf]

**S6 Table. Analysis of test performance based on pre-analytical variables in the testing set**

| Pre-analytical variable            | Value/Score    | Test Sensitivity  | Test Specificity  |
|------------------------------------|----------------|-------------------|-------------------|
| Time from collection to processing | 0 – 1 days     | 53.8%<br>(n=91)   | 95.7%<br>(n=70)   |
|                                    | 2 – 4 days     | 56.2%<br>(n=233)  | 98.7%<br>(n=383)  |
|                                    | 5 – 7 days     | 44.4%<br>(n=27)   | 100.0%<br>(n=66)  |
|                                    |                | <i>p</i> = 0.4988 | <i>p</i> = 0.0979 |
| Extent of hemolysis                | Low (<1)       | 50.0%<br>(n=12)   | 95.5%<br>(n=22)   |
|                                    | Medium (1-2.5) | 58.9%<br>(n=185)  | 97.3%<br>(n=219)  |
|                                    | High (>2.5)    | 47.3%<br>(n=146)  | 99.6%<br>(n=277)  |
|                                    | Not available  | 100.0%<br>(n=8)   | 100.0%<br>(n=1)   |
|                                    |                | <i>p</i> = 0.1040 | <i>p</i> = 0.0520 |
| Extent of lipemia                  | Low (0)        | 53.8%<br>(n=26)   | 96.3%<br>(n=27)   |
|                                    | Medium (>0-1)  | 61.6%<br>(n=86)   | 98.0%<br>(n=245)  |
|                                    | High (>1)      | 52.4%<br>(n=210)  | 99.1%<br>(n=233)  |
|                                    | Not available  | 51.7%<br>(n=29)   | 100.0%<br>(n=14)  |
|                                    |                | <i>p</i> = 0.3461 | <i>p</i> = 0.3881 |

*Chi-squared test was used to evaluate significance across multiple groups.*
