# Supplementary material for: Clinical validation of a next-generation sequencing-based multi-cancer early detection “liquid biopsy” blood test in over 1,000 dogs using an independent testing set: The CANcer Detection in Dogs (CANDiD) study
Source: PLoS One. 2022 Apr 26;17(4):e0266623. doi: 10.1371/journal.pone.0266623 (PMC9041869; doi:10.1371/journal.pone.0266623)
Supplement: S1 Table — (PDF) [file pone.0266623.s002.pdf]

S1 Table. Full subject level data for subjects enrolled in the CANDiD study

See legend on last page.

| Subject | Excluded | Reason for Exclusion             | Training Set | Testing Set | Age   | Sex    | Spay/ Neuter | Weight (kg) | Purebred or Mixed Breed | Breed (Purebred)           | Hemolysis | Lipemia | Cancer Diagnosis at Enrollment | Cancer Diagnosed after Liquid Biopsy | Cancer Type | Immunophenotype (Lymphoid Cancer) | Extent of Disease: Non-Lymphoid Cancer | Extent of Disease: Lymphoid Cancer | Tumor Size | Cancer Type (Cancer #2) | Immunophenotype (Cancer #2 if Lymphoid) | Extent of Disease: Non-Lymphoid Cancer (Cancer #2) | Extent of Disease: Lymphoid Cancer (Cancer #2) | Tumor Size (Cancer #2) | Liquid Biopsy Result | CSO Prediction of Hematological Malignancy |
|---------|----------|----------------------------------|--------------|-------------|-------|--------|--------------|-------------|-------------------------|----------------------------|-----------|---------|--------------------------------|--------------------------------------|-------------|-----------------------------------|----------------------------------------|------------------------------------|------------|-------------------------|-----------------------------------------|----------------------------------------------------|------------------------------------------------|------------------------|----------------------|--------------------------------------------|
| 0001    | No       | NA                               | No           | Yes         | 3.00  | Male   | Yes          | 81.47       | Purebred                | St. Bernard                | 3.0       | 2.0     | No                             | No                                   | NA          | NA                                | NA                                     | NA                                 | NA         | NA                      | NA                                      | NA                                                 | NA                                             | NA                     | Negative             | No                                         |
| 0002    | No       | NA                               | Yes          | No          | 3.00  | Female | Yes          | 62.53       | Purebred                | St. Bernard                | 2.0       | 2.0     | No                             | No                                   | NA          | NA                                | NA                                     | NA                                 | NA         | NA                      | NA                                      | NA                                                 | NA                                             | NA                     | Negative             | No                                         |
| 0003    | No       | NA                               | No           | Yes         | 2.42  | Male   | Yes          | 25.05       | Mixed-breed             | NA                         | 0.0       | 1.0     | No                             | No                                   | NA          | NA                                | NA                                     | NA                                 | NA         | NA                      | NA                                      | NA                                                 | NA                                             | NA                     | Negative             | No                                         |
| 0004    | Yes      | Test failure                     | No           | No          | 1.75  | Female | Yes          | 20.54       | Mixed-breed             | NA                         | 0.0       | 1.0     | No                             | No                                   | NA          | NA                                | NA                                     | NA                                 | NA         | NA                      | NA                                      | NA                                                 | NA                                             | NA                     | Negative             | No                                         |
| 0005    | Yes      | Test failure                     | No           | No          | 3.00  | Male   | Yes          | 42.89       | Mixed-breed             | NA                         | 0.0       | 0.0     | No                             | No                                   | NA          | NA                                | NA                                     | NA                                 | NA         | NA                      | NA                                      | NA                                                 | NA                                             | NA                     | Negative             | No                                         |
| 0006    | No       | NA                               | Yes          | No          | 8.00  | Male   | Yes          | 31.87       | Mixed-breed             | NA                         | 0.5       | 0.5     | No                             | No                                   | NA          | NA                                | NA                                     | NA                                 | NA         | NA                      | NA                                      | NA                                                 | NA                                             | NA                     | Negative             | No                                         |
| 0007    | No       | NA                               | No           | Yes         | 7.00  | Female | Yes          | 24.05       | Mixed-breed             | NA                         | 1.0       | 1.0     | No                             | No                                   | NA          | NA                                | NA                                     | NA                                 | NA         | NA                      | NA                                      | NA                                                 | NA                                             | NA                     | Negative             | No                                         |
| 0008    | Yes      | Enrollment or Clinical Deviation | No           | No          | 4.00  | Male   | Yes          | 38.68       | Mixed-breed             | NA                         | 0.0       | 1.0     | No                             | No                                   | NA          | NA                                | NA                                     | NA                                 | NA         | NA                      | NA                                      | NA                                                 | NA                                             | NA                     | Negative             | No                                         |
| 0009    | No       | NA                               | No           | Yes         | 11.00 | Male   | Yes          | 43.18       | Mixed-breed             | NA                         | 0.0       | 1.0     | No                             | No                                   | NA          | NA                                | NA                                     | NA                                 | NA         | NA                      | NA                                      | NA                                                 | NA                                             | NA                     | Positive             | No                                         |
| 0010    | No       | NA                               | No           | Yes         | 1.08  | Male   | Yes          | 32.73       | Mixed-breed             | NA                         | 0.0       | 0.0     | No                             | No                                   | NA          | NA                                | NA                                     | NA                                 | NA         | NA                      | NA                                      | NA                                                 | NA                                             | NA                     | Negative             | No                                         |
| 0011    | No       | NA                               | No           | Yes         | 3.00  | Male   | Yes          | 11.18       | Purebred                | Boston Terrier             | 1.0       | 1.0     | No                             | No                                   | NA          | NA                                | NA                                     | NA                                 | NA         | NA                      | NA                                      | NA                                                 | NA                                             | NA                     | Negative             | No                                         |
| 0012    | Yes      | Test failure                     | No           | No          | 1.25  | Female | Yes          | 11.27       | Mixed-breed             | NA                         | 0.0       | 0.0     | No                             | No                                   | NA          | NA                                | NA                                     | NA                                 | NA         | NA                      | NA                                      | NA                                                 | NA                                             | NA                     | Negative             | No                                         |
| 0013    | No       | NA                               | No           | Yes         | 5.58  | Male   | Yes          | 34.55       | Mixed-breed             | NA                         | 0.0       | 0.0     | No                             | No                                   | NA          | NA                                | NA                                     | NA                                 | NA         | NA                      | NA                                      | NA                                                 | NA                                             | NA                     | Negative             | No                                         |
| 0014    | No       | NA                               | Yes          | No          | 6.00  | Female | Yes          | 37.00       | Purebred                | Labrador Retriever         | 2.0       | 2.0     | No                             | No                                   | NA          | NA                                | NA                                     | NA                                 | NA         | NA                      | NA                                      | NA                                                 | NA                                             | NA                     | Negative             | No                                         |
| 0015    | No       | NA                               | Yes          | No          | 6.00  | Male   | Yes          | 40.36       | Purebred                | Labrador Retriever         | 1.0       | 1.0     | No                             | No                                   | NA          | NA                                | NA                                     | NA                                 | NA         | NA                      | NA                                      | NA                                                 | NA                                             | NA                     | Negative             | No                                         |
| 0016    | No       | NA                               | No           | Yes         | 3.67  | Female | Yes          | 24.64       | Purebred                | Boxer                      | 3.0       | NA      | No                             | No                                   | NA          | NA                                | NA                                     | NA                                 | NA         | NA                      | NA                                      | NA                                                 | NA                                             | NA                     | Negative             | No                                         |
| 0017    | No       | NA                               | No           | Yes         | 1.33  | Male   | Yes          | 35.68       | Purebred                | German Shepherd            | 0.0       | 0.0     | No                             | No                                   | NA          | NA                                | NA                                     | NA                                 | NA         | NA                      | NA                                      | NA                                                 | NA                                             | NA                     | Negative             | No                                         |
| 0018    | No       | NA                               | Yes          | No          | 13.25 | Female | Yes          | 30.45       | Purebred                | Golden Retriever           | 0.0       | 0.0     | No                             | No                                   | NA          | NA                                | NA                                     | NA                                 | NA         | NA                      | NA                                      | NA                                                 | NA                                             | NA                     | Negative             | No                                         |
| 0019    | No       | NA                               | No           | Yes         | 1.67  | Female | Yes          | 11.59       | Mixed-breed             | NA                         | 2.0       | 1.0     | No                             | No                                   | NA          | NA                                | NA                                     | NA                                 | NA         | NA                      | NA                                      | NA                                                 | NA                                             | NA                     | Negative             | No                                         |
| 0020    | No       | NA                               | No           | Yes         | 2.42  | Male   | Yes          | 34.09       | Mixed-breed             | NA                         | 1.0       | 1.0     | No                             | No                                   | NA          | NA                                | NA                                     | NA                                 | NA         | NA                      | NA                                      | NA                                                 | NA                                             | NA                     | Negative             | No                                         |
| 0021    | No       | NA                               | No           | Yes         | 3.67  | Female | Yes          | 29.06       | Mixed-breed             | NA                         | 1.0       | 2.0     | No                             | No                                   | NA          | NA                                | NA                                     | NA                                 | NA         | NA                      | NA                                      | NA                                                 | NA                                             | NA                     | Negative             | No                                         |
| 0022    | No       | NA                               | No           | Yes         | 6.42  | Female | Yes          | 14.43       | Mixed-breed             | NA                         | 2.5       | 1.0     | No                             | No                                   | NA          | NA                                | NA                                     | NA                                 | NA         | NA                      | NA                                      | NA                                                 | NA                                             | NA                     | Negative             | No                                         |
| 0023    | No       | NA                               | No           | Yes         | 12.50 | Female | Yes          | 36.08       | Mixed-breed             | NA                         | 1.0       | 1.0     | No                             | No                                   | NA          | NA                                | NA                                     | NA                                 | NA         | NA                      | NA                                      | NA                                                 | NA                                             | NA                     | Negative             | No                                         |
| 0024    | No       | NA                               | No           | Yes         | 8.17  | Female | Yes          | 30.91       | Mixed-breed             | NA                         | 3.5       | 2.0     | No                             | No                                   | NA          | NA                                | NA                                     | NA                                 | NA         | NA                      | NA                                      | NA                                                 | NA                                             | NA                     | Negative             | No                                         |
| 0025    | No       | NA                               | Yes          | No          | 5.08  | Female | Yes          | 30.00       | Mixed-breed             | NA                         | 1.5       | 1.5     | No                             | No                                   | NA          | NA                                | NA                                     | NA                                 | NA         | NA                      | NA                                      | NA                                                 | NA                                             | NA                     | Negative             | No                                         |
| 0026    | Yes      | Test failure                     | No           | No          | 10.83 | Female | Yes          | 30.91       | Purebred                | Labrador Retriever         | 0.0       | 1.0     | No                             | No                                   | NA          | NA                                | NA                                     | NA                                 | NA         | NA                      | NA                                      | NA                                                 | NA                                             | NA                     | Negative             | No                                         |
| 0027    | No       | NA                               | No           | Yes         | 3.08  | Female | Yes          | 62.63       | Mixed-breed             | NA                         | 3.0       | 1.0     | No                             | No                                   | NA          | NA                                | NA                                     | NA                                 | NA         | NA                      | NA                                      | NA                                                 | NA                                             | NA                     | Negative             | No                                         |
| 0028    | No       | NA                               | No           | Yes         | 2.00  | Female | Yes          | 34.09       | Purebred                | German Shepherd            | 2.0       | NA      | No                             | No                                   | NA          | NA                                | NA                                     | NA                                 | NA         | NA                      | NA                                      | NA                                                 | NA                                             | NA                     | Negative             | No                                         |
| 0029    | No       | NA                               | No           | Yes         | 3.92  | Male   | Yes          | 34.09       | Purebred                | German Shepherd            | 2.5       | 1.0     | No                             | No                                   | NA          | NA                                | NA                                     | NA                                 | NA         | NA                      | NA                                      | NA                                                 | NA                                             | NA                     | Negative             | No                                         |
| 0030    | No       | NA                               | No           | Yes         | 8.83  | Male   | Yes          | 25.91       | Mixed-breed             | NA                         | 1.0       | 1.0     | No                             | No                                   | NA          | NA                                | NA                                     | NA                                 | NA         | NA                      | NA                                      | NA                                                 | NA                                             | NA                     | Negative             | No                                         |
| 0031    | No       | NA                               | No           | Yes         | 9.42  | Male   | Yes          | 10.45       | Purebred                | Boston Terrier             | 3.5       | 1.0     | No                             | No                                   | NA          | NA                                | NA                                     | NA                                 | NA         | NA                      | NA                                      | NA                                                 | NA                                             | NA                     | Negative             | No                                         |
| 0032    | No       | NA                               | Yes          | No          | 7.50  | Female | Yes          | 22.73       | Mixed-breed             | NA                         | 1.5       | 1.5     | No                             | No                                   | NA          | NA                                | NA                                     | NA                                 | NA         | NA                      | NA                                      | NA                                                 | NA                                             | NA                     | Negative             | No                                         |
| 0033    | No       | NA                               | Yes          | No          | 12.42 | Male   | Yes          | 36.82       | Mixed-breed             | NA                         | 3.0       | 1.0     | No                             | No                                   | NA          | NA                                | NA                                     | NA                                 | NA         | NA                      | NA                                      | NA                                                 | NA                                             | NA                     | Negative             | No                                         |
| 0034    | No       | NA                               | No           | Yes         | 2.00  | Male   | Yes          | 34.09       | Purebred                | German Shepherd            | 2.0       | 1.0     | No                             | No                                   | NA          | NA                                | NA                                     | NA                                 | NA         | NA                      | NA                                      | NA                                                 | NA                                             | NA                     | Negative             | No                                         |
| 0035    | No       | NA                               | Yes          | No          | 6.83  | Male   | Yes          | 35.91       | Mixed-breed             | NA                         | 2.5       | 1.0     | No                             | No                                   | NA          | NA                                | NA                                     | NA                                 | NA         | NA                      | NA                                      | NA                                                 | NA                                             | NA                     | Negative             | No                                         |
| 0036    | No       | NA                               | No           | Yes         | 4.42  | Male   | No           | 31.09       | Purebred                | Golden Retriever           | 4.0       | 2.0     | No                             | No                                   | NA          | NA                                | NA                                     | NA                                 | NA         | NA                      | NA                                      | NA                                                 | NA                                             | NA                     | Negative             | No                                         |
| 0037    | No       | NA                               | No           | Yes         | 5.00  | Female | Yes          | 11.23       | Purebred                | Cocker Spaniel             | 1.0       | 1.0     | No                             | No                                   | NA          | NA                                | NA                                     | NA                                 | NA         | NA                      | NA                                      | NA                                                 | NA                                             | NA                     | Negative             | No                                         |
| 0038    | Yes      | Laboratory Workflow Deviation    | No           | No          | 11.00 | Female | Yes          | 9.55        | Purebred                | Pembroke Welsh Corgi       | 1.0       | 0.5     | No                             | No                                   | NA          | NA                                | NA                                     | NA                                 | NA         | NA                      | NA                                      | NA                                                 | NA                                             | NA                     | Negative             | No                                         |
| 0039    | No       | NA                               | No           | Yes         | 2.08  | Female | No           | 38.36       | Purebred                | Rottweiler                 | 1.0       | 2.0     | No                             | No                                   | NA          | NA                                | NA                                     | NA                                 | NA         | NA                      | NA                                      | NA                                                 | NA                                             | NA                     | Negative             | No                                         |
| 0040    | No       | NA                               | No           | Yes         | 5.00  | Male   | Yes          | 31.41       | Mixed-breed             | NA                         | 1.0       | 1.0     | No                             | No                                   | NA          | NA                                | NA                                     | NA                                 | NA         | NA                      | NA                                      | NA                                                 | NA                                             | NA                     | Negative             | No                                         |
| 0041    | Yes      | Test failure                     | No           | No          | 4.50  | Male   | Yes          | 6.05        | Mixed-breed             | NA                         | 1.5       | 1.0     | No                             | No                                   | NA          | NA                                | NA                                     | NA                                 | NA         | NA                      | NA                                      | NA                                                 | NA                                             | NA                     | Negative             | No                                         |
| 0042    | No       | NA                               | No           | Yes         | 7.17  | Male   | Yes          | 11.95       | Mixed-breed             | NA                         | 0.5       | 1.0     | No                             | No                                   | NA          | NA                                | NA                                     | NA                                 | NA         | NA                      | NA                                      | NA                                                 | NA                                             | NA                     | Negative             | No                                         |
| 0043    | No       | NA                               | Yes          | No          | 12.00 | Female | Yes          | 11.68       | Mixed-breed             | NA                         | 4.0       | 2.0     | No                             | No                                   | NA          | NA                                | NA                                     | NA                                 | NA         | NA                      | NA                                      | NA                                                 | NA                                             | NA                     | Negative             | No                                         |
| 0044    | Yes      | Enrollment or Clinical Deviation | No           | No          | 10.75 | Male   | Yes          | 23.64       | Mixed-breed             | NA                         | 3.0       | 1.0     | No                             | No                                   | NA          | NA                                | NA                                     | NA                                 | NA         | NA                      | NA                                      | NA                                                 | NA                                             | NA                     | Negative             | No                                         |
| 0045    | No       | NA                               | Yes          | No          | 3.33  | Female | Yes          | 34.00       | Purebred                | Labrador Retriever         | 2.0       | 1.0     | No                             | No                                   | NA          | NA                                | NA                                     | NA                                 | NA         | NA                      | NA                                      | NA                                                 | NA                                             | NA                     | Negative             | No                                         |
| 0046    | No       | NA                               | Yes          | No          | 11.83 | Female | Yes          | 19.55       | Purebred                | English Springer Spaniel   | 3.5       | 2.0     | No                             | No                                   | NA          | NA                                | NA                                     | NA                                 | NA         | NA                      | NA                                      | NA                                                 | NA                                             | NA                     | Negative             | No                                         |
| 0047    | No       | NA                               | No           | Yes         | 4.83  | Female | No           | 27.73       | Purebred                | German Shorthaired Pointer | 1.0       | 2.0     | No                             | No                                   | NA          | NA                                | NA                                     | NA                                 | NA         | NA                      | NA                                      | NA                                                 | NA                                             | NA                     | Negative             | No                                         |
| 0048    | No       | NA                               | No           | Yes         | 1.33  | Male   | Yes          | 11.55       | Mixed-breed             | NA                         | 4.0       | 2.0     | No                             | No                                   | NA          | NA                                | NA                                     | NA                                 | NA         | NA                      | NA                                      | NA                                                 | NA                                             | NA                     | Negative             | No                                         |
| 0049    | No       | NA                               | No           | Yes         | 9.42  | Female | Yes          | 12.73       | Mixed-breed             | NA                         | 4.0       | 2.0     | No                             | No                                   | NA          | NA                                | NA                                     | NA                                 | NA         | NA                      | NA                                      | NA                                                 | NA                                             | NA                     | Negative             | No                                         |
| 0050    | No       | NA                               | No           | Yes         | 2.67  | Female | Yes          | 31.32       | Mixed-breed             | NA                         | 1.0       | 1.0     | No                             | No                                   | NA          | NA                                | NA                                     | NA                                 | NA         | NA                      | NA                                      | NA                                                 | NA                                             | NA                     | Negative             | No                                         |
| 0051    | No       | NA                               | No           | Yes         | 4.25  | Female | Yes          | 27.41       | Mixed-breed             | NA                         | 4.0       | 2.0     | No                             | No                                   | NA          | NA                                | NA                                     | NA                                 | NA         | NA                      | NA                                      | NA                                                 | NA                                             | NA                     | Negative             | No                                         |
| 0052    | Yes      | Test failure                     | No           | No          | 4.08  | Female | Yes          | 53.11       | Purebred                | Cane Corso                 | NA        | 1.0     | No                             | No                                   | NA          | NA                                | NA                                     | NA                                 | NA         | NA                      | NA                                      | NA                                                 | NA                                             | NA                     | Negative             | No                                         |
| 0053    | No       | NA                               | No           | Yes         | 3.67  | Male   | Yes          | 30.16       | Mixed-breed             | NA                         | 3.5       | 2.0     | No                             | No                                   | NA          | NA                                | NA                                     | NA                                 | NA         | NA                      | NA                                      | NA                                                 | NA                                             | NA                     | Negative             | No                                         |
| 0054    | No       | NA                               | No           | Yes         | 3.67  | Female | Yes          | 34.07       | Mixed-breed             | NA                         | 2.5       | 1.0     | No                             | No                                   | NA          | NA                                | NA                                     | NA                                 | NA         | NA                      | NA                                      | NA                                                 | NA                                             | NA                     | Negative             | No                                         |
| 0055    | No       | NA                               | No           | Yes         | 2.00  | Female | Yes          | 21.82       | Mixed-breed             | NA                         | 3.0       | 2.0     | No                             | No                                   | NA          | NA                                | NA                                     | NA                                 | NA         | NA                      | NA                                      | NA                                                 | NA                                             | NA                     | Negative             | No                                         |
| 0056    | No       | NA                               | No           | Yes         | 5.50  | Male   | Yes          | 15.91       | Purebred                | Beagle                     | 2.0       | 1.0     | No                             | No                                   | NA          | NA                                | NA                                     | NA                                 | NA         | NA                      | NA                                      | NA                                                 | NA                                             | NA                     | Negative             | No                                         |
| 0057    | No       | NA                               | No           | Yes         | 1.92  | Male   | Yes          | 44.64       | Mixed-breed             | NA                         | 1.0       | 1.0     | No                             | No                                   | NA          | NA                                | NA                                     | NA                                 | NA         | NA                      | NA                                      | NA                                                 | NA                                             | NA                     | Negative             | No                                         |
| 0058    | No       | NA                               | No           | Yes         | 9.50  | Female | Yes          | 32.64       | Purebred                | Doberman Pinscher          | 3.0       | 1.0     | No                             | No                                   | NA          | NA                                | NA                                     | NA                                 | NA         | NA                      | NA                                      | NA                                                 | NA                                             | NA                     | Negative             | No                                         |
| 0059    | No       | NA                               | No           | Yes         | 8.25  | Female | Yes          | 22.55       | Purebred                | Greyhound                  | 4.0       | 2.0     | No                             | No                                   | NA          | NA                                | NA                                     | NA                                 | NA         | NA                      | NA                                      | NA                                                 | NA                                             | NA                     | Negative             | No                                         |
| 0060    | No       | NA                               | No           | Yes         | 6.83  | Female | Yes          | 24.65       | Mixed-breed             | NA                         | 1.0       | 1.0     | No                             | No                                   | NA          | NA                                | NA                                     | NA                                 | NA         | NA                      | NA                                      | NA                                                 | NA                                             | NA                     | Negative             | No                                         |
| 0061    | No       | NA                               | No           | Yes         | 5.17  | Male   | Yes          | 81.82       | Purebred                | St. Bernard                | 2.0       | 1.0     | No                             | No                                   | NA          | NA                                | NA                                     | NA                                 | NA         | NA                      | NA                                      | NA                                                 | NA                                             | NA                     | Negative             | No                                         |
| 0062    | Yes      | Test failure                     | No           | No          | 12.00 | Male   | Yes          | 26.56       | Mixed-breed             | NA                         | 3.0       | 1.0     | No                             | No                                   | NA          | NA                                | NA                                     | NA                                 | NA         | NA                      | NA                                      | NA                                                 | NA                                             | NA                     | Fail                 | No                                         |
| 0063    | No       | NA                               | No           | Yes         | 5.42  | Female | Yes          | 10.72       | Purebred                | French Bulldog             | 1.5       | 2.0     | No                             | No                                   | NA          | NA                                | NA                                     | NA                                 | NA         | NA                      | NA                                      | NA                                                 | NA                                             | NA                     | Negative             | No                                         |
| 0064    | Yes      | Laboratory Workflow Deviation    | No           | No          | 3.67  | Male   | No           | 33.07       | Mixed-breed             | NA                         | 4.0       | 2.0     | No                             | No                                   | NA          | NA                                | NA                                     | NA                                 | NA         | NA                      | NA                                      | NA                                                 | NA                                             | NA                     | Negative             | No                                         |
| 0065    | No       | NA                               | No           | Yes         | 1.67  | Male   | Yes          | 35.45       | Purebred                | Boxer                      | 3.5       | 1.0     | No                             | No                                   | NA          | NA                                | NA                                     | NA                                 | NA         | NA                      | NA                                      | NA                                                 | NA                                             | NA                     | Negative             | No                                         |
| 0066    | No       | NA                               | Yes          | No          | 6.50  | Male   | Yes          | 11.12       | Mixed-breed             | NA                         | 3.5       | 1.5     | No                             | No                                   | NA          | NA                                | NA                                     | NA                                 | NA         | NA                      | NA                                      | NA                                                 | NA                                             | NA                     | Negative             | No                                         |
| 0067    | No       | NA                               | Yes          | No          | 1.83  | Male   | Yes          | 5.91        | Mixed-breed             | NA                         | 4.0       | 2.0     | No                             | No                                   | NA          | NA                                | NA                                     | NA                                 | NA         | NA                      | NA                                      | NA                                                 | NA                                             | NA                     | Negative             | No                                         |
| 0068    | No       | NA                               | Yes          | No          | 3.67  | Male   | Yes          | 29.66       | Mixed-breed             | NA                         |           |         |                                |                                      |             |                                   |                                        |                                    |            |                         |                                         |                                                    |                                                |                        |                      |                                            |

S1 Table. Full subject level data for subjects enrolled in the CANDiD study (continued)

See legend on last page.

| Subject | Excluded | Reason for Exclusion             | Training Set | Testing Set | Age   | Sex    | Spay/ Neuter | Weight (kg) | Purebred or Mixed Breed | Breed (Purebred)                    | Hemolysis | Lipemia | Cancer Diagnosis at Enrollment | Cancer Diagnosed after Liquid Biopsy | Cancer Type | Immunophenotype (Lymphoid Cancer) | Extent of Disease: Non-Lymphoid Cancer | Extent of Disease: Lymphoid Cancer | Tumor Size | Cancer Type (Cancer #2) | Immunophenotype (Cancer #2 if Lymphoid) | Extent of Disease: Non-Lymphoid Cancer (Cancer #2) | Extent of Disease: Lymphoid Cancer (Cancer #2) | Tumor Size (Cancer #2) | Liquid Biopsy Result | CSO Prediction of Hematological Malignancy |    |
|---------|----------|----------------------------------|--------------|-------------|-------|--------|--------------|-------------|-------------------------|-------------------------------------|-----------|---------|--------------------------------|--------------------------------------|-------------|-----------------------------------|----------------------------------------|------------------------------------|------------|-------------------------|-----------------------------------------|----------------------------------------------------|------------------------------------------------|------------------------|----------------------|--------------------------------------------|----|
| 0073    | Yes      | Laboratory Workflow Deviation    | No           | No          | NA    | NA     | NA           | NA          | NA                      | NA                                  | 4.0       | 2.0     | No                             | No                                   | NA          | NA                                | NA                                     | NA                                 | NA         | NA                      | NA                                      | NA                                                 | NA                                             | NA                     | Negative             | No                                         |    |
| 0074    | No       | NA                               | No           | Yes         | 6.75  | Male   | Yes          | 34.50       | Purebred                | Golden Retriever                    | 0.0       | 0.0     | No                             | No                                   | NA          | NA                                | NA                                     | NA                                 | NA         | NA                      | NA                                      | NA                                                 | NA                                             | NA                     | Negative             | No                                         |    |
| 0075    | No       | NA                               | Yes          | No          | 7.00  | Female | Yes          | 20.59       | Purebred                | Siberian Husky                      | 3.5       | 1.0     | No                             | No                                   | NA          | NA                                | NA                                     | NA                                 | NA         | NA                      | NA                                      | NA                                                 | NA                                             | NA                     | Negative             | No                                         |    |
| 0076    | Yes      | Enrollment or Clinical Deviation | No           | No          | 10.67 | Male   | Yes          | 22.82       | Mixed-breed             | NA                                  | 1.0       | 1.0     | No                             | No                                   | NA          | NA                                | NA                                     | NA                                 | NA         | NA                      | NA                                      | NA                                                 | NA                                             | NA                     | Negative             | No                                         |    |
| 0077    | No       | NA                               | No           | Yes         | 3.67  | Female | Yes          | 21.00       | Mixed-breed             | NA                                  | 2.0       | 2.0     | No                             | No                                   | NA          | NA                                | NA                                     | NA                                 | NA         | NA                      | NA                                      | NA                                                 | NA                                             | NA                     | Negative             | No                                         |    |
| 0078    | No       | NA                               | No           | Yes         | 1.92  | Male   | Yes          | 50.00       | Purebred                | Rottweiler                          | 3.0       | NA      | No                             | No                                   | NA          | NA                                | NA                                     | NA                                 | NA         | NA                      | NA                                      | NA                                                 | NA                                             | NA                     | Negative             | No                                         |    |
| 0079    | No       | NA                               | No           | Yes         | 2.42  | Male   | Yes          | 28.45       | Mixed-breed             | NA                                  | 0.0       | NA      | No                             | No                                   | NA          | NA                                | NA                                     | NA                                 | NA         | NA                      | NA                                      | NA                                                 | NA                                             | NA                     | Negative             | No                                         |    |
| 0080    | No       | NA                               | No           | Yes         | 5.33  | Male   | Yes          | 33.64       | Purebred                | Golden Retriever                    | 2.0       | 0.0     | No                             | No                                   | NA          | NA                                | NA                                     | NA                                 | NA         | NA                      | NA                                      | NA                                                 | NA                                             | NA                     | Negative             | No                                         |    |
| 0081    | No       | NA                               | Yes          | No          | 8.42  | Female | Yes          | 45.09       | Purebred                | German Shepherd                     | 4.0       | 2.0     | No                             | No                                   | NA          | NA                                | NA                                     | NA                                 | NA         | NA                      | NA                                      | NA                                                 | NA                                             | NA                     | Negative             | No                                         |    |
| 0082    | No       | NA                               | No           | Yes         | 5.00  | Female | Yes          | 17.24       | Mixed-breed             | NA                                  | 3.0       | 2.0     | No                             | No                                   | NA          | NA                                | NA                                     | NA                                 | NA         | NA                      | NA                                      | NA                                                 | NA                                             | NA                     | Negative             | No                                         |    |
| 0083    | No       | NA                               | No           | Yes         | 4.17  | Male   | Yes          | 27.27       | Purebred                | Brittany                            | 1.0       | 1.0     | No                             | No                                   | NA          | NA                                | NA                                     | NA                                 | NA         | NA                      | NA                                      | NA                                                 | NA                                             | NA                     | Negative             | No                                         |    |
| 0084    | No       | NA                               | Yes          | No          | 1.42  | Female | Yes          | 33.18       | Purebred                | Labrador Retriever                  | 2.5       | 2.0     | No                             | No                                   | NA          | NA                                | NA                                     | NA                                 | NA         | NA                      | NA                                      | NA                                                 | NA                                             | NA                     | Negative             | No                                         |    |
| 0085    | Yes      | Test failure                     | No           | No          | 9.75  | Male   | Yes          | 30.26       | Mixed-breed             | NA                                  | 1.0       | 1.0     | No                             | No                                   | NA          | NA                                | NA                                     | NA                                 | NA         | NA                      | NA                                      | NA                                                 | NA                                             | NA                     | Fail                 | No                                         |    |
| 0086    | No       | NA                               | No           | Yes         | 3.50  | Male   | Yes          | 25.75       | Mixed-breed             | NA                                  | NA        | 1.5     | No                             | No                                   | NA          | NA                                | NA                                     | NA                                 | NA         | NA                      | NA                                      | NA                                                 | NA                                             | NA                     | Negative             | No                                         |    |
| 0087    | No       | NA                               | No           | Yes         | 2.50  | Male   | Yes          | 63.64       | Purebred                | Great Dane                          | 2.0       | 1.0     | No                             | No                                   | NA          | NA                                | NA                                     | NA                                 | NA         | NA                      | NA                                      | NA                                                 | NA                                             | NA                     | Negative             | No                                         |    |
| 0088    | No       | NA                               | Yes          | No          | 11.50 | Female | Yes          | 16.63       | Purebred                | Pembroke Welsh Corgi                | 3.5       | 2.0     | No                             | No                                   | NA          | NA                                | NA                                     | NA                                 | NA         | NA                      | NA                                      | NA                                                 | NA                                             | NA                     | Negative             | No                                         |    |
| 0089    | No       | NA                               | No           | Yes         | 8.00  | Male   | Yes          | 14.63       | Purebred                | Cardigan Welsh Corgi                | 3.5       | 2.0     | No                             | No                                   | NA          | NA                                | NA                                     | NA                                 | NA         | NA                      | NA                                      | NA                                                 | NA                                             | NA                     | Negative             | No                                         |    |
| 0090    | No       | NA                               | No           | Yes         | 5.00  | Female | Yes          | 33.87       | Purebred                | Bouvi <span>ers</span> des Flandres | 0.5       | 1.0     | No                             | No                                   | NA          | NA                                | NA                                     | NA                                 | NA         | NA                      | NA                                      | NA                                                 | NA                                             | NA                     | Negative             | No                                         |    |
| 0091    | No       | NA                               | No           | Yes         | 1.67  | Female | Yes          | 38.78       | Mixed-breed             | NA                                  | 2.0       | 1.0     | No                             | No                                   | NA          | NA                                | NA                                     | NA                                 | NA         | NA                      | NA                                      | NA                                                 | NA                                             | NA                     | Negative             | No                                         |    |
| 0092    | No       | NA                               | No           | Yes         | 5.00  | Female | Yes          | 20.84       | Mixed-breed             | NA                                  | 3.0       | 1.0     | No                             | No                                   | NA          | NA                                | NA                                     | NA                                 | NA         | NA                      | NA                                      | NA                                                 | NA                                             | NA                     | Negative             | No                                         |    |
| 0093    | No       | NA                               | Yes          | No          | 6.00  | Female | Yes          | 27.76       | Mixed-breed             | NA                                  | 2.0       | 1.0     | No                             | No                                   | NA          | NA                                | NA                                     | NA                                 | NA         | NA                      | NA                                      | NA                                                 | NA                                             | NA                     | Negative             | No                                         |    |
| 0094    | No       | NA                               | No           | Yes         | 5.42  | Male   | Yes          | 22.91       | Mixed-breed             | NA                                  | 4.0       | 2.0     | No                             | No                                   | NA          | NA                                | NA                                     | NA                                 | NA         | NA                      | NA                                      | NA                                                 | NA                                             | NA                     | Negative             | No                                         |    |
| 0095    | No       | NA                               | No           | Yes         | 4.33  | Female | No           | 27.27       | Mixed-breed             | NA                                  | 3.5       | 2.0     | No                             | No                                   | NA          | NA                                | NA                                     | NA                                 | NA         | NA                      | NA                                      | NA                                                 | NA                                             | NA                     | Negative             | No                                         |    |
| 0096    | No       | NA                               | No           | Yes         | 2.08  | Female | No           | 26.82       | Mixed-breed             | NA                                  | 4.0       | 1.0     | No                             | No                                   | NA          | NA                                | NA                                     | NA                                 | NA         | NA                      | NA                                      | NA                                                 | NA                                             | NA                     | Negative             | No                                         |    |
| 0097    | No       | NA                               | No           | Yes         | 2.33  | Female | No           | 38.64       | Purebred                | Bernese Mountain Dogs               | 4.0       | 2.0     | No                             | No                                   | NA          | NA                                | NA                                     | NA                                 | NA         | NA                      | NA                                      | NA                                                 | NA                                             | NA                     | Negative             | No                                         |    |
| 0098    | No       | NA                               | No           | Yes         | 3.50  | Male   | No           | 32.00       | Mixed-breed             | NA                                  | 3.5       | 2.0     | No                             | No                                   | NA          | NA                                | NA                                     | NA                                 | NA         | NA                      | NA                                      | NA                                                 | NA                                             | NA                     | Negative             | No                                         |    |
| 0099    | No       | NA                               | Yes          | No          | 11.08 | Female | Yes          | 40.09       | Purebred                | German Shepherd                     | 2.5       | 1.0     | No                             | No                                   | NA          | NA                                | NA                                     | NA                                 | NA         | NA                      | NA                                      | NA                                                 | NA                                             | NA                     | Negative             | No                                         |    |
| 0100    | No       | NA                               | No           | Yes         | 1.33  | Male   | No           | 38.55       | Purebred                | Labrador Retriever                  | 3.5       | 1.5     | No                             | No                                   | NA          | NA                                | NA                                     | NA                                 | NA         | NA                      | NA                                      | NA                                                 | NA                                             | NA                     | Negative             | No                                         |    |
| 0101    | No       | NA                               | No           | Yes         | 2.67  | Female | No           | 27.82       | Purebred                | Labrador Retriever                  | 3.0       | 1.0     | No                             | No                                   | NA          | NA                                | NA                                     | NA                                 | NA         | NA                      | NA                                      | NA                                                 | NA                                             | NA                     | Negative             | No                                         |    |
| 0102    | No       | NA                               | No           | Yes         | 2.08  | Female | No           | 33.64       | Purebred                | Golden Retriever                    | 1.0       | 1.0     | No                             | No                                   | NA          | NA                                | NA                                     | NA                                 | NA         | NA                      | NA                                      | NA                                                 | NA                                             | NA                     | Negative             | No                                         |    |
| 0103    | No       | NA                               | No           | Yes         | 4.00  | Female | Yes          | 23.25       | Mixed-breed             | NA                                  | 3.5       | 1.0     | No                             | No                                   | NA          | NA                                | NA                                     | NA                                 | NA         | NA                      | NA                                      | NA                                                 | NA                                             | NA                     | Negative             | No                                         |    |
| 0104    | No       | NA                               | No           | Yes         | 11.00 | Male   | Yes          | 24.55       | Mixed-breed             | NA                                  | 2.0       | 1.0     | No                             | No                                   | NA          | NA                                | NA                                     | NA                                 | NA         | NA                      | NA                                      | NA                                                 | NA                                             | NA                     | Negative             | No                                         |    |
| 0105    | No       | NA                               | No           | Yes         | 8.00  | Male   | Yes          | 33.67       | Mixed-breed             | NA                                  | 1.0       | 1.0     | No                             | No                                   | NA          | NA                                | NA                                     | NA                                 | NA         | NA                      | NA                                      | NA                                                 | NA                                             | NA                     | Negative             | No                                         |    |
| 0106    | Yes      | Test failure                     | No           | No          | 3.00  | Female | No           | 20.45       | Purebred                | Siberian Husky                      | 3.5       | 1.5     | No                             | No                                   | NA          | NA                                | NA                                     | NA                                 | NA         | NA                      | NA                                      | NA                                                 | NA                                             | NA                     | Positive             | No                                         |    |
| 0107    | No       | NA                               | No           | Yes         | 7.17  | Female | Yes          | 25.91       | Mixed-breed             | NA                                  | 2.5       | 2.0     | No                             | No                                   | NA          | NA                                | NA                                     | NA                                 | NA         | NA                      | NA                                      | NA                                                 | NA                                             | NA                     | Negative             | No                                         |    |
| 0108    | No       | NA                               | No           | Yes         | 11.00 | Female | Yes          | 10.59       | Purebred                | Cocker Spaniel                      | 2.5       | NA      | No                             | No                                   | NA          | NA                                | NA                                     | NA                                 | NA         | NA                      | NA                                      | NA                                                 | NA                                             | NA                     | Negative             | No                                         |    |
| 0109    | No       | NA                               | No           | Yes         | 10.50 | Female | Yes          | 13.86       | Purebred                | Pembroke Welsh Corgi                | 4.0       | 2.0     | No                             | No                                   | NA          | NA                                | NA                                     | NA                                 | NA         | NA                      | NA                                      | NA                                                 | NA                                             | NA                     | Negative             | No                                         |    |
| 0110    | No       | NA                               | Yes          | No          | 9.42  | Female | Yes          | 33.64       | Purebred                | Boxer                               | 3.0       | 1.0     | No                             | No                                   | NA          | NA                                | NA                                     | NA                                 | NA         | NA                      | NA                                      | NA                                                 | NA                                             | NA                     | Negative             | No                                         |    |
| 0111    | No       | NA                               | No           | Yes         | 9.50  | Male   | Yes          | 38.45       | Purebred                | Golden Retriever                    | 3.5       | 2.0     | No                             | No                                   | NA          | NA                                | NA                                     | NA                                 | NA         | NA                      | NA                                      | NA                                                 | NA                                             | NA                     | Negative             | No                                         |    |
| 0112    | No       | NA                               | No           | Yes         | 2.67  | Male   | No           | 25.45       | Purebred                | Poodle, Standard                    | 4.0       | 2.0     | No                             | No                                   | NA          | NA                                | NA                                     | NA                                 | NA         | NA                      | NA                                      | NA                                                 | NA                                             | NA                     | Negative             | No                                         |    |
| 0113    | Yes      | Laboratory Workflow Deviation    | No           | No          | 2.17  | Female | Yes          | 26.64       | Mixed-breed             | NA                                  | 4.0       | 2.0     | No                             | No                                   | NA          | NA                                | NA                                     | NA                                 | NA         | NA                      | NA                                      | NA                                                 | NA                                             | NA                     | Negative             | No                                         |    |
| 0114    | No       | NA                               | Yes          | No          | 5.00  | Female | No           | 29.55       | Mixed-breed             | NA                                  | 4.0       | 1.0     | No                             | No                                   | NA          | NA                                | NA                                     | NA                                 | NA         | NA                      | NA                                      | NA                                                 | NA                                             | NA                     | Negative             | No                                         |    |
| 0115    | Yes      | Test failure                     | No           | No          | 6.83  | Male   | Yes          | 60.45       | Purebred                | Newfoundland                        | NA        | 2.0     | No                             | No                                   | NA          | NA                                | NA                                     | NA                                 | NA         | NA                      | NA                                      | NA                                                 | NA                                             | NA                     | Negative             | No                                         |    |
| 0116    | No       | NA                               | No           | Yes         | 8.17  | Female | Yes          | 34.55       | Mixed-breed             | NA                                  | 3.5       | 2.0     | No                             | No                                   | NA          | NA                                | NA                                     | NA                                 | NA         | NA                      | NA                                      | NA                                                 | NA                                             | NA                     | Negative             | No                                         |    |
| 0117    | Yes      | Test failure                     | No           | No          | 3.42  | Male   | Yes          | 71.82       | Purebred                | Mastiff                             | 1.0       | 1.0     | No                             | No                                   | NA          | NA                                | NA                                     | NA                                 | NA         | NA                      | NA                                      | NA                                                 | NA                                             | NA                     | Fail                 | No                                         |    |
| 0118    | Yes      | Test failure                     | No           | No          | 10.00 | Female | Yes          | 32.23       | Purebred                | Labrador Retriever                  | 2.0       | 2.0     | No                             | No                                   | NA          | NA                                | NA                                     | NA                                 | NA         | NA                      | NA                                      | NA                                                 | NA                                             | NA                     | Fail                 | No                                         |    |
| 0119    | No       | NA                               | No           | Yes         | 4.17  | Female | Yes          | 19.86       | Purebred                | Boxer                               | 2.5       | 2.0     | No                             | No                                   | NA          | NA                                | NA                                     | NA                                 | NA         | NA                      | NA                                      | NA                                                 | NA                                             | NA                     | Negative             | No                                         |    |
| 0120    | No       | NA                               | No           | Yes         | 6.08  | Female | Yes          | 23.36       | Mixed-breed             | NA                                  | 1.5       | 1.5     | No                             | No                                   | NA          | NA                                | NA                                     | NA                                 | NA         | NA                      | NA                                      | NA                                                 | NA                                             | NA                     | Negative             | No                                         |    |
| 0121    | No       | NA                               | No           | Yes         | 2.33  | Male   | Yes          | 11.36       | Purebred                | Boston Terrier                      | 4.0       | 2.0     | No                             | No                                   | NA          | NA                                | NA                                     | NA                                 | NA         | NA                      | NA                                      | NA                                                 | NA                                             | NA                     | Negative             | No                                         |    |
| 0122    | Yes      | Enrollment or Clinical Deviation | No           | No          | 10.42 | Male   | Yes          | 15.91       | Purebred                | Boston Terrier                      | 4.0       | 1.5     | No                             | No                                   | NA          | NA                                | NA                                     | NA                                 | NA         | NA                      | NA                                      | NA                                                 | NA                                             | NA                     | NA                   | Negative                                   | No |
| 0123    | No       | NA                               | No           | Yes         | 2.17  | Male   | Yes          | 14.41       | Purebred                | French Bulldog                      | 1.5       | 2.0     | No                             | No                                   | NA          | NA                                | NA                                     | NA                                 | NA         | NA                      | NA                                      | NA                                                 | NA                                             | NA                     | Negative             | No                                         |    |
| 0124    | No       | NA                               | Yes          | No          | 6.00  | Male   | Yes          | 38.18       | Mixed-breed             | NA                                  | 2.0       | 2.0     | No                             | No                                   | NA          | NA                                | NA                                     | NA                                 | NA         | NA                      | NA                                      | NA                                                 | NA                                             | NA                     | Negative             | No                                         |    |
| 0125    | No       | NA                               | No           | Yes         | 2.00  | Female | Yes          | 25.59       | Mixed-breed             | NA                                  | 1.0       | 2.0     | No                             | No                                   | NA          | NA                                | NA                                     | NA                                 | NA         | NA                      | NA                                      | NA                                                 | NA                                             | NA                     | Negative             | No                                         |    |
| 0126    | No       | NA                               | No           | Yes         | 3.00  | Male   | Yes          | 31.82       | Mixed-breed             | NA                                  | 3.0       | 2.0     | No                             | No                                   | NA          | NA                                | NA                                     | NA                                 | NA         | NA                      | NA                                      | NA                                                 | NA                                             | NA                     | Negative             | No                                         |    |
| 0127    | No       | NA                               | Yes          | No          | 2.00  | Female | Yes          | 24.55       | Purebred                | English Springer Spaniel            | 3.0       | 1.0     | No                             | No                                   | NA          | NA                                | NA                                     | NA                                 | NA         | NA                      | NA                                      | NA                                                 | NA                                             | NA                     | Negative             | No                                         |    |
| 0128    | No       | NA                               | No           | Yes         | 3.00  | Female | No           | 28.45       | Purebred                | Labrador Retriever                  | 3.0       | 1.0     | No                             | No                                   | NA          | NA                                | NA                                     | NA                                 | NA         | NA                      | NA                                      | NA                                                 | NA                                             | NA                     | Negative             | No                                         |    |
| 0129    | No       | NA                               | No           | Yes         | 2.08  | Female | No           | 27.91       | Purebred                | Golden Retriever                    | 2.0       | 1.0     | No                             | No                                   | NA          | NA                                | NA                                     | NA                                 | NA         | NA                      | NA                                      | NA                                                 | NA                                             | NA                     | Negative             | No                                         |    |
| 0130    | No       | NA                               | No           | Yes         | 2.50  | Female | No           | 36.82       | Purebred                | Bernese Mountain Dogs               | 2.0       | 2.0     | No                             | No                                   | NA          | NA                                | NA                                     | NA                                 | NA         | NA                      | NA                                      | NA                                                 | NA                                             | NA                     | Negative             | No                                         |    |
| 0131    | No       | NA                               | No           | Yes         | 4.00  | Male   | No           | 27.27       | Purebred                | Siberian Husky                      | 4.0       | 2.0     | No                             | No                                   | NA          | NA                                | NA                                     | NA                                 | NA         | NA                      | NA                                      | NA                                                 | NA                                             | NA                     | Negative             | No                                         |    |
| 0132    | No       | NA                               | No           | Yes         | 4.17  | Female | Yes          | 33.32       | Purebred                | German Shepherd                     | 3.0       | 1.0     | No                             | No                                   | NA          | NA                                | NA                                     | NA                                 | NA         | NA                      | NA                                      | NA                                                 | NA                                             | NA                     | Negative             | No                                         |    |
| 0133    | Yes      | Enrollment or Clinical Deviation | No           | No          | 10.75 | Female | Yes          | 27.23       | Purebred                | Greyhound                           | 3.0       | 1.0     | No                             | No                                   | NA          | NA                                | NA                                     | NA                                 | NA         | NA                      | NA                                      | NA                                                 | NA                                             | NA                     | Positive             | No                                         |    |
| 0134    | Yes      | Laboratory Workflow Deviation    | No           | No          | 10.58 | Female | Yes          | 18.09       | Purebred                | English Springer Spaniel            | 4.0       | 2.0     | No                             | No                                   | NA          | NA                                | NA                                     | NA                                 | NA         | NA                      | NA                                      | NA                                                 | NA                                             | NA                     | Negative             | No                                         |    |
| 0135    | Yes      | Laboratory Workflow Deviation    | No           | No          | 11.08 | Male   | Yes          | 10.09       | Mixed-breed             | NA                                  | 2.0       | 2.0     | No                             | No                                   | NA          | NA                                | NA                                     | NA                                 | NA         | NA                      | NA                                      | NA                                                 | NA                                             | NA                     | Negative             | No                                         |    |
| 0136    | No       | NA                               | No           | Yes         | 11.00 | Female | Yes          | 22.64       | Mixed-breed             | NA                                  | 3.0       | 2.0     | No                             | No                                   | NA          | NA                                | NA                                     | NA                                 | NA         | NA                      | NA                                      | NA                                                 | NA                                             | NA                     | Negative             | No                                         |    |
| 0137    | Yes      | Test failure                     | No           | No          | 3.00  | Male   | Yes          | 28.64       | Mixed-breed             | NA                                  | NA        | 1.5     | No                             | No                                   | NA          | NA                                | NA                                     | NA                                 | NA         | NA                      | NA                                      | NA                                                 | NA                                             | NA                     | Negative             | No                                         |    |
| 0138    | No       | NA                               | No           | Yes         | 7.50  | Male   | Yes          | 24.09       | Purebred                | Vizslas                             | 4.0       | NA      | No                             | No                                   | NA          | NA                                | NA                                     | NA                                 | NA         | NA                      | NA                                      | NA                                                 | NA                                             | NA                     | Negative             | No                                         |    |
| 0139    | No       | NA                               | Yes          | No          | 6.00  | Female | Yes          | 17.64       | Purebred                | Border Collie                       | 1.0       | 1.0     | No                             | No                                   | NA          | NA                                | NA                                     | NA                                 | NA         | NA                      | NA                                      | NA                                                 | NA                                             | NA                     | Negative             | No                                         |    |
| 0140    | Yes      | Test failure                     | No           | No          | 3.17  | Male   |              |             |                         |                                     |           |         |                                |                                      |             |                                   |                                        |                                    |            |                         |                                         |                                                    |                                                |                        |                      |                                            |    |



S1 Table. Full subject level data for subjects enrolled in the CANDiD study (continued)

See legend on last page.

| Subject | Excluded | Reason for Exclusion             | Training Set | Testing Set | Age   | Sex    | Spay/ Neuter | Weight (kg) | Purebred or Mixed Breed | Breed (Purebred)            | Hemolysis | Lipemia | Cancer Diagnosis at Enrollment | Cancer Diagnosed after Liquid Biopsy | Cancer Type | Immunophenotype (Lymphoid Cancer) | Extent of Disease: Non-Lymphoid Cancer | Extent of Disease: Lymphoid Cancer | Tumor Size | Cancer Type (Cancer #2) | Immunophenotype (Cancer #2 if Lymphoid) | Extent of Disease: Non-Lymphoid Cancer (Cancer #2) | Extent of Disease: Lymphoid Cancer (Cancer #2) | Tumor Size (Cancer #2) | Liquid Biopsy Result | CSO Prediction of Hematological Malignancy |
|---------|----------|----------------------------------|--------------|-------------|-------|--------|--------------|-------------|-------------------------|-----------------------------|-----------|---------|--------------------------------|--------------------------------------|-------------|-----------------------------------|----------------------------------------|------------------------------------|------------|-------------------------|-----------------------------------------|----------------------------------------------------|------------------------------------------------|------------------------|----------------------|--------------------------------------------|
| 0210    | No       | NA                               | Yes          | No          | 6.33  | Female | Yes          | 21.91       | Mixed-breed             | NA                          | 2.0       | 1.0     | No                             | No                                   | NA          | NA                                | NA                                     | NA                                 | NA         | NA                      | NA                                      | NA                                                 | NA                                             | NA                     | Negative             | No                                         |
| 0211    | No       | NA                               | No           | Yes         | 5.00  | Female | No           | 21.82       | Purebred                | Siberian Husky              | 2.5       | 2.0     | No                             | No                                   | NA          | NA                                | NA                                     | NA                                 | NA         | NA                      | NA                                      | NA                                                 | NA                                             | NA                     | Negative             | No                                         |
| 0212    | No       | NA                               | Yes          | No          | 10.33 | Female | Yes          | 19.09       | Purebred                | Dalmation                   | 1.0       | 2.0     | No                             | No                                   | NA          | NA                                | NA                                     | NA                                 | NA         | NA                      | NA                                      | NA                                                 | NA                                             | NA                     | Negative             | No                                         |
| 0213    | Yes      | Test failure                     | No           | No          | 1.33  | Male   | Yes          | 29.77       | Mixed-breed             | NA                          | 2.0       | 2.0     | No                             | No                                   | NA          | NA                                | NA                                     | NA                                 | NA         | NA                      | NA                                      | NA                                                 | NA                                             | NA                     | Fail                 | No                                         |
| 0214    | No       | NA                               | No           | Yes         | 10.00 | Female | Yes          | 35.18       | Mixed-breed             | NA                          | 3.0       | 2.0     | No                             | No                                   | NA          | NA                                | NA                                     | NA                                 | NA         | NA                      | NA                                      | NA                                                 | NA                                             | NA                     | Negative             | No                                         |
| 0215    | No       | NA                               | Yes          | No          | 7.00  | Male   | Yes          | 45.00       | Mixed-breed             | NA                          | 1.5       | 1.5     | No                             | No                                   | NA          | NA                                | NA                                     | NA                                 | NA         | NA                      | NA                                      | NA                                                 | NA                                             | NA                     | Negative             | No                                         |
| 0216    | Yes      | Test failure                     | No           | No          | 6.33  | Male   | Yes          | 21.18       | Mixed-breed             | NA                          | 3.0       | 1.5     | No                             | No                                   | NA          | NA                                | NA                                     | NA                                 | NA         | NA                      | NA                                      | NA                                                 | NA                                             | NA                     | Negative             | No                                         |
| 0217    | No       | NA                               | No           | Yes         | 12.42 | Female | Yes          | 29.77       | Mixed-breed             | NA                          | 3.0       | 1.0     | No                             | No                                   | NA          | NA                                | NA                                     | NA                                 | NA         | NA                      | NA                                      | NA                                                 | NA                                             | NA                     | Negative             | No                                         |
| 0218    | No       | NA                               | Yes          | No          | 8.33  | Male   | Yes          | 12.86       | Purebred                | French Bulldog              | 1.0       | 1.0     | No                             | No                                   | NA          | NA                                | NA                                     | NA                                 | NA         | NA                      | NA                                      | NA                                                 | NA                                             | NA                     | Negative             | No                                         |
| 0219    | No       | NA                               | No           | Yes         | 10.92 | Female | Yes          | 25.95       | Purebred                | Labrador Retriever          | 2.5       | 1.0     | No                             | No                                   | NA          | NA                                | NA                                     | NA                                 | NA         | NA                      | NA                                      | NA                                                 | NA                                             | NA                     | Negative             | No                                         |
| 0220    | No       | NA                               | No           | Yes         | 1.67  | Female | Yes          | 28.77       | Purebred                | Labrador Retriever          | 0.0       | 1.0     | No                             | No                                   | NA          | NA                                | NA                                     | NA                                 | NA         | NA                      | NA                                      | NA                                                 | NA                                             | NA                     | Negative             | No                                         |
| 0221    | No       | NA                               | Yes          | No          | 9.00  | Female | Yes          | 23.73       | Mixed-breed             | NA                          | 1.0       | 1.0     | No                             | No                                   | NA          | NA                                | NA                                     | NA                                 | NA         | NA                      | NA                                      | NA                                                 | NA                                             | NA                     | Negative             | No                                         |
| 0222    | No       | NA                               | No           | Yes         | 8.00  | Female | Yes          | 27.14       | Mixed-breed             | NA                          | 3.0       | 1.0     | No                             | No                                   | NA          | NA                                | NA                                     | NA                                 | NA         | NA                      | NA                                      | NA                                                 | NA                                             | NA                     | Negative             | No                                         |
| 0223    | No       | NA                               | No           | Yes         | 11.00 | Male   | Yes          | 10.27       | Purebred                | Cairn Terrier               | 3.0       | 2.0     | No                             | No                                   | NA          | NA                                | NA                                     | NA                                 | NA         | NA                      | NA                                      | NA                                                 | NA                                             | NA                     | Negative             | No                                         |
| 0224    | No       | NA                               | No           | Yes         | 7.17  | Female | Yes          | 28.18       | Purebred                | Golden Retriever            | 2.0       | 1.0     | No                             | No                                   | NA          | NA                                | NA                                     | NA                                 | NA         | NA                      | NA                                      | NA                                                 | NA                                             | NA                     | Negative             | No                                         |
| 0225    | No       | NA                               | No           | Yes         | 8.75  | Female | Yes          | 20.55       | Purebred                | Soft Coated Wheaten Terrier | 2.5       | 1.0     | No                             | No                                   | NA          | NA                                | NA                                     | NA                                 | NA         | NA                      | NA                                      | NA                                                 | NA                                             | NA                     | Negative             | No                                         |
| 0226    | No       | NA                               | No           | Yes         | 5.33  | Female | Yes          | 10.95       | Mixed-breed             | NA                          | 2.5       | 1.0     | No                             | No                                   | NA          | NA                                | NA                                     | NA                                 | NA         | NA                      | NA                                      | NA                                                 | NA                                             | NA                     | Negative             | No                                         |
| 0227    | No       | NA                               | No           | Yes         | 3.50  | Female | Yes          | 12.95       | Mixed-breed             | NA                          | 4.0       | 1.0     | No                             | No                                   | NA          | NA                                | NA                                     | NA                                 | NA         | NA                      | NA                                      | NA                                                 | NA                                             | NA                     | Negative             | No                                         |
| 0228    | Yes      | Test failure                     | No           | No          | 3.42  | Male   | Yes          | 38.41       | Mixed-breed             | NA                          | 4.0       | 2.0     | No                             | No                                   | NA          | NA                                | NA                                     | NA                                 | NA         | NA                      | NA                                      | NA                                                 | NA                                             | NA                     | Negative             | No                                         |
| 0229    | Yes      | Test failure                     | No           | No          | 6.25  | Male   | Yes          | 42.41       | Mixed-breed             | NA                          | 4.0       | 1.0     | No                             | No                                   | NA          | NA                                | NA                                     | NA                                 | NA         | NA                      | NA                                      | NA                                                 | NA                                             | NA                     | Negative             | No                                         |
| 0230    | No       | NA                               | No           | Yes         | 8.50  | Female | Yes          | 19.59       | Mixed-breed             | NA                          | 1.0       | 2.0     | No                             | No                                   | NA          | NA                                | NA                                     | NA                                 | NA         | NA                      | NA                                      | NA                                                 | NA                                             | NA                     | Negative             | No                                         |
| 0231    | No       | NA                               | No           | Yes         | 8.00  | Female | Yes          | 43.18       | Purebred                | Golden Retriever            | 2.0       | 2.0     | No                             | No                                   | NA          | NA                                | NA                                     | NA                                 | NA         | NA                      | NA                                      | NA                                                 | NA                                             | NA                     | Negative             | No                                         |
| 0232    | No       | NA                               | No           | Yes         | 2.33  | Female | Yes          | 25.91       | Mixed-breed             | NA                          | 2.5       | 1.0     | No                             | No                                   | NA          | NA                                | NA                                     | NA                                 | NA         | NA                      | NA                                      | NA                                                 | NA                                             | NA                     | Negative             | No                                         |
| 0233    | No       | NA                               | No           | Yes         | 10.00 | Male   | No           | 53.18       | Purebred                | Rottweiler                  | 2.5       | 1.0     | No                             | No                                   | NA          | NA                                | NA                                     | NA                                 | NA         | NA                      | NA                                      | NA                                                 | NA                                             | NA                     | Negative             | No                                         |
| 0234    | Yes      | Enrollment or Clinical Deviation | No           | No          | 4.33  | Male   | Yes          | 22.73       | Mixed-breed             | NA                          | 2.0       | 1.0     | No                             | No                                   | NA          | NA                                | NA                                     | NA                                 | NA         | NA                      | NA                                      | NA                                                 | NA                                             | NA                     | Negative             | No                                         |
| 0235    | No       | NA                               | No           | Yes         | 4.42  | Female | Yes          | 35.45       | Mixed-breed             | NA                          | 1.5       | 1.5     | No                             | No                                   | NA          | NA                                | NA                                     | NA                                 | NA         | NA                      | NA                                      | NA                                                 | NA                                             | NA                     | Negative             | No                                         |
| 0236    | No       | NA                               | Yes          | No          | 11.08 | Male   | Yes          | 11.82       | Mixed-breed             | NA                          | 1.0       | 1.0     | No                             | No                                   | NA          | NA                                | NA                                     | NA                                 | NA         | NA                      | NA                                      | NA                                                 | NA                                             | NA                     | Negative             | No                                         |
| 0237    | No       | NA                               | No           | Yes         | 10.00 | Female | Yes          | 29.55       | Mixed-breed             | NA                          | 0.0       | 1.0     | No                             | No                                   | NA          | NA                                | NA                                     | NA                                 | NA         | NA                      | NA                                      | NA                                                 | NA                                             | NA                     | Negative             | No                                         |
| 0238    | No       | NA                               | No           | Yes         | 12.50 | Male   | Yes          | 29.55       | Mixed-breed             | NA                          | 3.0       | 2.0     | No                             | No                                   | NA          | NA                                | NA                                     | NA                                 | NA         | NA                      | NA                                      | NA                                                 | NA                                             | NA                     | Negative             | No                                         |
| 0239    | No       | NA                               | No           | Yes         | 2.00  | Male   | Yes          | 16.82       | Mixed-breed             | NA                          | 1.5       | 1.0     | No                             | No                                   | NA          | NA                                | NA                                     | NA                                 | NA         | NA                      | NA                                      | NA                                                 | NA                                             | NA                     | Negative             | No                                         |
| 0240    | Yes      | Laboratory Workflow Deviation    | No           | No          | 3.00  | Male   | Yes          | 7.50        | Mixed-breed             | NA                          | 1.0       | 1.0     | No                             | No                                   | NA          | NA                                | NA                                     | NA                                 | NA         | NA                      | NA                                      | NA                                                 | NA                                             | NA                     | Negative             | No                                         |
| 0241    | No       | NA                               | Yes          | No          | 6.33  | Male   | Yes          | 47.73       | Purebred                | Bernese Mountain Dogs       | 3.0       | 1.0     | No                             | No                                   | NA          | NA                                | NA                                     | NA                                 | NA         | NA                      | NA                                      | NA                                                 | NA                                             | NA                     | Positive             | No                                         |
| 0242    | Yes      | Test failure                     | No           | No          | 11.33 | Female | Yes          | 36.36       | Purebred                | Golden Retriever            | 1.0       | 1.0     | No                             | No                                   | NA          | NA                                | NA                                     | NA                                 | NA         | NA                      | NA                                      | NA                                                 | NA                                             | NA                     | Fail                 | No                                         |
| 0243    | No       | NA                               | No           | Yes         | 3.50  | Female | Yes          | 29.55       | Mixed-breed             | NA                          | 1.0       | 1.0     | No                             | No                                   | NA          | NA                                | NA                                     | NA                                 | NA         | NA                      | NA                                      | NA                                                 | NA                                             | NA                     | Negative             | No                                         |
| 0244    | Yes      | Laboratory Workflow Deviation    | No           | No          | 14.00 | Male   | Yes          | 6.82        | Mixed-breed             | NA                          | 2.0       | 1.0     | No                             | No                                   | NA          | NA                                | NA                                     | NA                                 | NA         | NA                      | NA                                      | NA                                                 | NA                                             | NA                     | Negative             | No                                         |
| 0245    | No       | NA                               | No           | Yes         | 10.75 | Female | Yes          | 25.00       | Mixed-breed             | NA                          | 1.0       | 2.0     | No                             | No                                   | NA          | NA                                | NA                                     | NA                                 | NA         | NA                      | NA                                      | NA                                                 | NA                                             | NA                     | Negative             | No                                         |
| 0246    | No       | NA                               | No           | Yes         | 1.08  | Female | No           | 38.73       | Purebred                | Rottweiler                  | 4.0       | 2.0     | No                             | No                                   | NA          | NA                                | NA                                     | NA                                 | NA         | NA                      | NA                                      | NA                                                 | NA                                             | NA                     | Negative             | No                                         |
| 0247    | No       | NA                               | No           | Yes         | 9.00  | Female | Yes          | 22.73       | Mixed-breed             | NA                          | 4.0       | 1.0     | No                             | No                                   | NA          | NA                                | NA                                     | NA                                 | NA         | NA                      | NA                                      | NA                                                 | NA                                             | NA                     | Negative             | No                                         |
| 0248    | No       | NA                               | No           | Yes         | 7.42  | Male   | Yes          | 27.27       | Mixed-breed             | NA                          | 1.0       | 1.0     | No                             | No                                   | NA          | NA                                | NA                                     | NA                                 | NA         | NA                      | NA                                      | NA                                                 | NA                                             | NA                     | Negative             | No                                         |
| 0249    | No       | NA                               | No           | Yes         | 3.25  | Female | Yes          | 16.36       | Mixed-breed             | NA                          | 4.0       | 1.0     | No                             | No                                   | NA          | NA                                | NA                                     | NA                                 | NA         | NA                      | NA                                      | NA                                                 | NA                                             | NA                     | Negative             | No                                         |
| 0250    | No       | NA                               | No           | Yes         | 7.25  | Male   | Yes          | 25.00       | Purebred                | Poodle, Standard            | 3.0       | 1.0     | No                             | No                                   | NA          | NA                                | NA                                     | NA                                 | NA         | NA                      | NA                                      | NA                                                 | NA                                             | NA                     | Negative             | No                                         |
| 0251    | Yes      | Test failure                     | No           | No          | 5.42  | Female | Yes          | 16.09       | Mixed-breed             | NA                          | 4.0       | 2.0     | No                             | No                                   | NA          | NA                                | NA                                     | NA                                 | NA         | NA                      | NA                                      | NA                                                 | NA                                             | NA                     | Negative             | No                                         |
| 0252    | No       | NA                               | No           | Yes         | 1.75  | Male   | Yes          | 10.18       | Purebred                | Boston Terrier              | 4.0       | 2.0     | No                             | No                                   | NA          | NA                                | NA                                     | NA                                 | NA         | NA                      | NA                                      | NA                                                 | NA                                             | NA                     | Negative             | No                                         |
| 0253    | No       | NA                               | No           | Yes         | 5.67  | Female | No           | 28.18       | Purebred                | Labrador Retriever          | 3.5       | 2.0     | No                             | No                                   | NA          | NA                                | NA                                     | NA                                 | NA         | NA                      | NA                                      | NA                                                 | NA                                             | NA                     | Negative             | No                                         |
| 0254    | No       | NA                               | No           | Yes         | 1.25  | Female | Yes          | 11.09       | Mixed-breed             | NA                          | 2.0       | 1.0     | No                             | No                                   | NA          | NA                                | NA                                     | NA                                 | NA         | NA                      | NA                                      | NA                                                 | NA                                             | NA                     | Negative             | No                                         |
| 0255    | No       | NA                               | Yes          | No          | 10.00 | Male   | Yes          | 15.27       | Purebred                | English Cocker Spaniel      | 4.0       | 2.0     | No                             | No                                   | NA          | NA                                | NA                                     | NA                                 | NA         | NA                      | NA                                      | NA                                                 | NA                                             | NA                     | Negative             | No                                         |
| 0256    | No       | NA                               | No           | Yes         | 2.50  | Male   | Yes          | 28.55       | Mixed-breed             | NA                          | 4.0       | 2.0     | No                             | No                                   | NA          | NA                                | NA                                     | NA                                 | NA         | NA                      | NA                                      | NA                                                 | NA                                             | NA                     | Negative             | No                                         |
| 0257    | No       | NA                               | No           | Yes         | 1.33  | Female | Yes          | 20.64       | Mixed-breed             | NA                          | 3.5       | 2.0     | No                             | No                                   | NA          | NA                                | NA                                     | NA                                 | NA         | NA                      | NA                                      | NA                                                 | NA                                             | NA                     | Negative             | No                                         |
| 0258    | No       | NA                               | No           | Yes         | 3.00  | Male   | Yes          | 51.41       | Purebred                | Great Dane                  | 2.5       | 1.0     | No                             | No                                   | NA          | NA                                | NA                                     | NA                                 | NA         | NA                      | NA                                      | NA                                                 | NA                                             | NA                     | Negative             | No                                         |
| 0259    | No       | NA                               | No           | Yes         | 4.92  | Female | Yes          | 40.99       | Mixed-breed             | NA                          | 2.5       | 2.0     | No                             | No                                   | NA          | NA                                | NA                                     | NA                                 | NA         | NA                      | NA                                      | NA                                                 | NA                                             | NA                     | Negative             | No                                         |
| 0260    | No       | NA                               | No           | Yes         | 4.42  | Male   | Yes          | 25.15       | Purebred                | Border Collie               | 4.0       | 2.0     | No                             | No                                   | NA          | NA                                | NA                                     | NA                                 | NA         | NA                      | NA                                      | NA                                                 | NA                                             | NA                     | Negative             | No                                         |
| 0261    | No       | NA                               | Yes          | No          | 2.08  | Male   | No           | 19.32       | Purebred                | Chesapeake Bay Retriever    | 2.0       | 1.0     | No                             | No                                   | NA          | NA                                | NA                                     | NA                                 | NA         | NA                      | NA                                      | NA                                                 | NA                                             | NA                     | Negative             | No                                         |
| 0262    | No       | NA                               | No           | Yes         | 2.33  | Male   | Yes          | 38.68       | Purebred                | German Shepherd             | 4.0       | 1.0     | No                             | No                                   | NA          | NA                                | NA                                     | NA                                 | NA         | NA                      | NA                                      | NA                                                 | NA                                             | NA                     | Negative             | No                                         |
| 0263    | Yes      | Test failure                     | No           | No          | 3.92  | Male   | Yes          | 58.62       | Purebred                | St. Bernard                 | 2.0       | 2.0     | No                             | No                                   | NA          | NA                                | NA                                     | NA                                 | NA         | NA                      | NA                                      | NA                                                 | NA                                             | NA                     | Fail                 | No                                         |
| 0264    | No       | NA                               | No           | Yes         | 9.50  | Male   | Yes          | 20.95       | Mixed-breed             | NA                          | 3.5       | 1.0     | No                             | No                                   | NA          | NA                                | NA                                     | NA                                 | NA         | NA                      | NA                                      | NA                                                 | NA                                             | NA                     | Negative             | No                                         |
| 0265    | No       | NA                               | No           | Yes         | 5.33  | Female | Yes          | 18.18       | Mixed-breed             | NA                          | 2.0       | 2.0     | No                             | No                                   | NA          | NA                                | NA                                     | NA                                 | NA         | NA                      | NA                                      | NA                                                 | NA                                             | NA                     | Negative             | No                                         |
| 0266    | No       | NA                               | No           | Yes         | 2.00  | Female | Yes          | 22.73       | Mixed-breed             | NA                          | 1.0       | 2.0     | No                             | No                                   | NA          | NA                                | NA                                     | NA                                 | NA         | NA                      | NA                                      | NA                                                 | NA                                             | NA                     | Negative             | No                                         |
| 0267    | No       | NA                               | No           | Yes         | 5.00  | Female | Yes          | 25.91       | Purebred                | Boxer                       | 4.0       | 2.0     | No                             | No                                   | NA          | NA                                | NA                                     | NA                                 | NA         | NA                      | NA                                      | NA                                                 | NA                                             | NA                     | Negative             | No                                         |
| 0268    | No       | NA                               | No           | Yes         | 2.17  | Female | Yes          | 6.51        | Mixed-breed             | NA                          | 3.5       | 2.0     | No                             | No                                   | NA          | NA                                | NA                                     | NA                                 | NA         | NA                      | NA                                      | NA                                                 | NA                                             | NA                     | Negative             | No                                         |
| 0269    | No       | NA                               | Yes          | No          | 11.00 | Male   | Yes          | 24.09       | Mixed-breed             | NA                          | 4.0       | 2.0     | No                             | No                                   | NA          | NA                                | NA                                     | NA                                 | NA         | NA                      | NA                                      | NA                                                 | NA                                             | NA                     | Negative             | No                                         |
| 0270    | No       | NA                               | No           | Yes         | 3.00  | Male   | No           | 49.00       | Purebred                | Mastiff                     | 3.0       | 1.5     | No                             | No                                   | NA          | NA                                | NA                                     | NA                                 | NA         | NA                      | NA                                      | NA                                                 | NA                                             | NA                     | Negative             | No                                         |
| 0271    | No       | NA                               | Yes          | No          | 8.67  | Female | Yes          | 28.64       | Mixed-breed             | NA                          | 3.0       | 1.0     | No                             | No                                   | NA          | NA                                | NA                                     | NA                                 | NA         | NA                      | NA                                      | NA                                                 | NA                                             | NA                     | Negative             | No                                         |
| 0272    | No       | NA                               | No           | Yes         | 9.67  | Female | Yes          | 32.73       | Mixed-breed             | NA                          | 3.5       | 1.5     | No                             | No                                   | NA          | NA                                | NA                                     | NA                                 | NA         | NA                      | NA                                      | NA                                                 | NA                                             | NA                     | Negative             | No                                         |
| 0273    | No       | NA                               | Yes          | No          | 8.08  | Female | Yes          | 26.82       | Mixed-breed             | NA                          | 4.0       | 2.0     | No                             | No                                   | NA          | NA                                | NA                                     | NA                                 | NA         | NA                      | NA                                      | NA                                                 | NA                                             | NA                     | Negative             | No                                         |
| 0274    | No       | NA                               | No           | Yes         | 3.00  | Male   | Yes          | 20.00       | Purebred                | English Setter              | 3.0       | 1.0     | No                             | No                                   | NA          | NA                                | NA                                     | NA                                 | NA         | NA                      | NA                                      | NA                                                 | NA                                             | NA                     | Negative             | No                                         |
| 0275    | Yes      | Enrollment or Clinical Deviation | No           | No          | 12.67 | Female | Yes          | 22.73       | Purebred                | Basset Hound                | 4.0       | 2.0     | No                             | No                                   | NA          | NA                                | NA                                     | NA                                 | NA         | NA                      | NA                                      | NA                                                 | NA                                             | NA                     | Negative             | No                                         |
| 0276    | No       | NA                               | No           | Yes         | 10.00 | Male   | Yes          | 34.09       | Mixed-breed             | NA                          | 2.5       | 2.0     | No                             | No                                   | NA          | NA                                | NA                                     | NA                                 | NA         | NA                      | NA                                      | NA                                                 | NA                                             | NA                     | Negative             | No                                         |
| 0277    | No       | NA                               | No           | Yes         | 10.00 | Male   | Yes          | 25.         |                         |                             |           |         |                                |                                      |             |                                   |                                        |                                    |            |                         |                                         |                                                    |                                                |                        |                      |                                            |

S1 Table. Full subject level data for subjects enrolled in the CANDiD study (continued)

See legend on last page.

| Subject | Excluded | Reason for Exclusion          | Training Set | Testing Set | Age   | Sex    | Spay/ Neuter | Weight (kg) | Purebred or Mixed Breed | Breed (Purebred)               | Hemolysis | Lipemia | Cancer Diagnosis at Enrollment | Cancer Diagnosed after Liquid Biopsy | Cancer Type | Immunophenotype (Lymphoid Cancer) | Extent of Disease: Non-Lymphoid Cancer | Extent of Disease: Lymphoid Cancer | Tumor Size | Cancer Type (Cancer #2) | Immunophenotype (Cancer #2 if Lymphoid) | Extent of Disease: Non-Lymphoid Cancer (Cancer #2) | Extent of Disease: Lymphoid Cancer (Cancer #2) | Tumor Size (Cancer #2) | Liquid Biopsy Result | CSO Prediction of Hematological Malignancy |
|---------|----------|-------------------------------|--------------|-------------|-------|--------|--------------|-------------|-------------------------|--------------------------------|-----------|---------|--------------------------------|--------------------------------------|-------------|-----------------------------------|----------------------------------------|------------------------------------|------------|-------------------------|-----------------------------------------|----------------------------------------------------|------------------------------------------------|------------------------|----------------------|--------------------------------------------|
| 0280    | No       | NA                            | Yes          | No          | 7.25  | Female | Yes          | 33.32       | Mixed-breed             | NA                             | 3.0       | 1.0     | No                             | No                                   | NA          | NA                                | NA                                     | NA                                 | NA         | NA                      | NA                                      | NA                                                 | NA                                             | NA                     | Negative             | No                                         |
| 0281    | No       | NA                            | Yes          | No          | 10.00 | Female | Yes          | 30.91       | Purebred                | Labrador Retriever             | 2.0       | 2.0     | No                             | No                                   | NA          | NA                                | NA                                     | NA                                 | NA         | NA                      | NA                                      | NA                                                 | NA                                             | NA                     | Negative             | No                                         |
| 0282    | No       | NA                            | Yes          | No          | 1.00  | Male   | Yes          | 34.09       | Mixed-breed             | NA                             | 3.0       | 1.5     | No                             | No                                   | NA          | NA                                | NA                                     | NA                                 | NA         | NA                      | NA                                      | NA                                                 | NA                                             | NA                     | Negative             | No                                         |
| 0283    | No       | NA                            | No           | Yes         | 2.50  | Male   | Yes          | 23.00       | Purebred                | English Bulldog                | 3.0       | 1.0     | No                             | No                                   | NA          | NA                                | NA                                     | NA                                 | NA         | NA                      | NA                                      | NA                                                 | NA                                             | NA                     | Negative             | No                                         |
| 0284    | No       | NA                            | No           | Yes         | 6.50  | Male   | Yes          | 35.45       | Purebred                | German Shepherd                | 4.0       | 2.0     | No                             | No                                   | NA          | NA                                | NA                                     | NA                                 | NA         | NA                      | NA                                      | NA                                                 | NA                                             | NA                     | Negative             | No                                         |
| 0286    | No       | NA                            | Yes          | No          | 6.67  | Female | Yes          | 30.91       | Purebred                | Doberman Pinscher              | 3.0       | 1.0     | No                             | No                                   | NA          | NA                                | NA                                     | NA                                 | NA         | NA                      | NA                                      | NA                                                 | NA                                             | NA                     | Negative             | No                                         |
| 0287    | No       | NA                            | Yes          | No          | 6.83  | Female | Yes          | 12.36       | Purebred                | French Bulldog                 | 4.0       | 2.0     | No                             | No                                   | NA          | NA                                | NA                                     | NA                                 | NA         | NA                      | NA                                      | NA                                                 | NA                                             | NA                     | Negative             | No                                         |
| 0288    | No       | NA                            | No           | Yes         | 4.00  | Female | Yes          | 55.14       | Purebred                | Great Dane                     | 2.5       | 2.0     | No                             | No                                   | NA          | NA                                | NA                                     | NA                                 | NA         | NA                      | NA                                      | NA                                                 | NA                                             | NA                     | Negative             | No                                         |
| 0289    | No       | NA                            | No           | Yes         | 11.00 | Male   | Yes          | 18.91       | Mixed-breed             | NA                             | 2.0       | 0.0     | No                             | No                                   | NA          | NA                                | NA                                     | NA                                 | NA         | NA                      | NA                                      | NA                                                 | NA                                             | NA                     | Negative             | No                                         |
| 0290    | No       | NA                            | No           | Yes         | 6.33  | Male   | Yes          | 56.64       | Mixed-breed             | NA                             | 2.5       | 2.0     | No                             | No                                   | NA          | NA                                | NA                                     | NA                                 | NA         | NA                      | NA                                      | NA                                                 | NA                                             | NA                     | Negative             | No                                         |
| 0291    | No       | NA                            | No           | Yes         | 5.33  | Female | Yes          | 38.45       | Purebred                | Golden Retriever               | 3.0       | 2.0     | No                             | No                                   | NA          | NA                                | NA                                     | NA                                 | NA         | NA                      | NA                                      | NA                                                 | NA                                             | NA                     | Negative             | No                                         |
| 0292    | No       | NA                            | No           | Yes         | 3.00  | Female | Yes          | 47.73       | Purebred                | Great Dane                     | 3.0       | 1.0     | No                             | No                                   | NA          | NA                                | NA                                     | NA                                 | NA         | NA                      | NA                                      | NA                                                 | NA                                             | NA                     | Negative             | No                                         |
| 0293    | No       | NA                            | No           | Yes         | 9.17  | Female | Yes          | 16.64       | Purebred                | Australian Shepherd            | 2.0       | 1.0     | No                             | No                                   | NA          | NA                                | NA                                     | NA                                 | NA         | NA                      | NA                                      | NA                                                 | NA                                             | NA                     | Negative             | No                                         |
| 0294    | No       | NA                            | No           | Yes         | 6.00  | Female | Yes          | 30.95       | Mixed-breed             | NA                             | 2.5       | 1.0     | No                             | No                                   | NA          | NA                                | NA                                     | NA                                 | NA         | NA                      | NA                                      | NA                                                 | NA                                             | NA                     | Negative             | No                                         |
| 0295    | No       | NA                            | No           | Yes         | 5.33  | Male   | No           | 9.18        | Purebred                | Scottish Terrier               | 0.0       | 1.0     | No                             | No                                   | NA          | NA                                | NA                                     | NA                                 | NA         | NA                      | NA                                      | NA                                                 | NA                                             | NA                     | Negative             | No                                         |
| 0296    | No       | NA                            | No           | Yes         | 7.17  | Female | Yes          | 12.00       | Purebred                | Scottish Terrier               | 2.0       | 0.0     | No                             | No                                   | NA          | NA                                | NA                                     | NA                                 | NA         | NA                      | NA                                      | NA                                                 | NA                                             | NA                     | Negative             | No                                         |
| 0297    | No       | NA                            | No           | Yes         | 1.58  | Female | Yes          | 25.45       | Mixed-breed             | NA                             | 4.0       | 2.0     | No                             | No                                   | NA          | NA                                | NA                                     | NA                                 | NA         | NA                      | NA                                      | NA                                                 | NA                                             | NA                     | Negative             | No                                         |
| 0298    | No       | NA                            | No           | Yes         | 4.58  | Female | Yes          | 12.27       | Mixed-breed             | NA                             | 2.5       | 1.0     | No                             | No                                   | NA          | NA                                | NA                                     | NA                                 | NA         | NA                      | NA                                      | NA                                                 | NA                                             | NA                     | Negative             | No                                         |
| 0299    | No       | NA                            | Yes          | No          | 8.00  | Female | Yes          | 34.47       | Mixed-breed             | NA                             | 2.0       | 1.0     | No                             | No                                   | NA          | NA                                | NA                                     | NA                                 | NA         | NA                      | NA                                      | NA                                                 | NA                                             | NA                     | Negative             | No                                         |
| 0300    | No       | NA                            | No           | Yes         | 2.75  | Female | Yes          | 23.85       | Mixed-breed             | NA                             | 3.0       | 2.0     | No                             | No                                   | NA          | NA                                | NA                                     | NA                                 | NA         | NA                      | NA                                      | NA                                                 | NA                                             | NA                     | Negative             | No                                         |
| 0301    | No       | NA                            | Yes          | No          | 1.17  | Female | Yes          | 36.27       | Purebred                | German Shepherd                | 4.0       | 2.0     | No                             | No                                   | NA          | NA                                | NA                                     | NA                                 | NA         | NA                      | NA                                      | NA                                                 | NA                                             | NA                     | Negative             | No                                         |
| 0302    | No       | NA                            | No           | Yes         | 6.33  | Male   | Yes          | 27.06       | Purebred                | Labrador Retriever             | 4.0       | 2.0     | No                             | No                                   | NA          | NA                                | NA                                     | NA                                 | NA         | NA                      | NA                                      | NA                                                 | NA                                             | NA                     | Negative             | No                                         |
| 0303    | No       | NA                            | No           | Yes         | 5.25  | Male   | Yes          | 28.16       | Mixed-breed             | NA                             | 3.5       | 2.0     | No                             | No                                   | NA          | NA                                | NA                                     | NA                                 | NA         | NA                      | NA                                      | NA                                                 | NA                                             | NA                     | Negative             | No                                         |
| 0304    | No       | NA                            | No           | Yes         | 13.08 | Male   | Yes          | 19.34       | Mixed-breed             | NA                             | 3.0       | 2.0     | No                             | No                                   | NA          | NA                                | NA                                     | NA                                 | NA         | NA                      | NA                                      | NA                                                 | NA                                             | NA                     | Negative             | No                                         |
| 0305    | No       | NA                            | No           | Yes         | 3.50  | Female | Yes          | 14.03       | Mixed-breed             | NA                             | 2.0       | 2.0     | No                             | No                                   | NA          | NA                                | NA                                     | NA                                 | NA         | NA                      | NA                                      | NA                                                 | NA                                             | NA                     | Negative             | No                                         |
| 0306    | No       | NA                            | Yes          | No          | 10.00 | Male   | Yes          | 18.41       | Purebred                | Cardigan Welsh Corgi           | 3.0       | 2.0     | No                             | No                                   | NA          | NA                                | NA                                     | NA                                 | NA         | NA                      | NA                                      | NA                                                 | NA                                             | NA                     | Negative             | No                                         |
| 0307    | No       | NA                            | No           | Yes         | 9.00  | Female | Yes          | 31.36       | Purebred                | Labrador Retriever             | 2.5       | 1.5     | No                             | No                                   | NA          | NA                                | NA                                     | NA                                 | NA         | NA                      | NA                                      | NA                                                 | NA                                             | NA                     | Negative             | No                                         |
| 0308    | No       | NA                            | Yes          | No          | 7.67  | Male   | Yes          | 28.73       | Mixed-breed             | NA                             | 3.5       | 1.0     | No                             | No                                   | NA          | NA                                | NA                                     | NA                                 | NA         | NA                      | NA                                      | NA                                                 | NA                                             | NA                     | Negative             | No                                         |
| 0309    | No       | NA                            | No           | Yes         | 2.33  | Male   | Yes          | 33.86       | Purebred                | Labrador Retriever             | 3.0       | 1.0     | No                             | No                                   | NA          | NA                                | NA                                     | NA                                 | NA         | NA                      | NA                                      | NA                                                 | NA                                             | NA                     | Negative             | No                                         |
| 0310    | No       | NA                            | No           | Yes         | 7.92  | Female | Yes          | 30.32       | Purebred                | Labrador Retriever             | 2.0       | 1.0     | No                             | No                                   | NA          | NA                                | NA                                     | NA                                 | NA         | NA                      | NA                                      | NA                                                 | NA                                             | NA                     | Negative             | No                                         |
| 0311    | No       | NA                            | No           | Yes         | 1.58  | Male   | Yes          | 29.86       | Mixed-breed             | NA                             | 4.0       | 1.0     | No                             | No                                   | NA          | NA                                | NA                                     | NA                                 | NA         | NA                      | NA                                      | NA                                                 | NA                                             | NA                     | Negative             | No                                         |
| 0312    | No       | NA                            | Yes          | No          | 7.75  | Female | Yes          | 20.45       | Mixed-breed             | NA                             | 2.5       | 1.0     | No                             | No                                   | NA          | NA                                | NA                                     | NA                                 | NA         | NA                      | NA                                      | NA                                                 | NA                                             | NA                     | Negative             | No                                         |
| 0313    | No       | NA                            | Yes          | No          | 12.92 | Male   | Yes          | 14.23       | Mixed-breed             | NA                             | 4.0       | 1.0     | No                             | No                                   | NA          | NA                                | NA                                     | NA                                 | NA         | NA                      | NA                                      | NA                                                 | NA                                             | NA                     | Negative             | No                                         |
| 0314    | No       | NA                            | No           | Yes         | 7.17  | Male   | Yes          | 42.59       | Purebred                | Labrador Retriever             | 2.5       | 1.0     | No                             | No                                   | NA          | NA                                | NA                                     | NA                                 | NA         | NA                      | NA                                      | NA                                                 | NA                                             | NA                     | Negative             | No                                         |
| 0315    | No       | NA                            | No           | Yes         | 2.42  | Male   | Yes          | 14.73       | Purebred                | Australian Shepherd            | 3.0       | 1.0     | No                             | No                                   | NA          | NA                                | NA                                     | NA                                 | NA         | NA                      | NA                                      | NA                                                 | NA                                             | NA                     | Negative             | No                                         |
| 0316    | No       | NA                            | No           | Yes         | 1.00  | Female | Yes          | 23.64       | Mixed-breed             | NA                             | 1.0       | 1.0     | No                             | No                                   | NA          | NA                                | NA                                     | NA                                 | NA         | NA                      | NA                                      | NA                                                 | NA                                             | NA                     | Negative             | No                                         |
| 0317    | No       | NA                            | No           | Yes         | 3.42  | Female | Yes          | 31.18       | Purebred                | Labrador Retriever             | 4.0       | 2.0     | No                             | No                                   | NA          | NA                                | NA                                     | NA                                 | NA         | NA                      | NA                                      | NA                                                 | NA                                             | NA                     | Negative             | No                                         |
| 0318    | No       | NA                            | No           | Yes         | 1.67  | Male   | Yes          | 45.45       | Purebred                | Labrador Retriever             | 4.0       | 2.0     | No                             | No                                   | NA          | NA                                | NA                                     | NA                                 | NA         | NA                      | NA                                      | NA                                                 | NA                                             | NA                     | Negative             | No                                         |
| 0319    | Yes      | Laboratory Workflow Deviation | No           | No          | 1.58  | Male   | Yes          | 25.82       | Purebred                | American Staffordshire Terrier | 3.5       | 1.5     | No                             | No                                   | NA          | NA                                | NA                                     | NA                                 | NA         | NA                      | NA                                      | NA                                                 | NA                                             | NA                     | Negative             | No                                         |
| 0320    | No       | NA                            | No           | Yes         | 7.00  | Male   | Yes          | 33.00       | Purebred                | Labrador Retriever             | 3.0       | 2.0     | No                             | No                                   | NA          | NA                                | NA                                     | NA                                 | NA         | NA                      | NA                                      | NA                                                 | NA                                             | NA                     | Negative             | No                                         |
| 0321    | No       | NA                            | No           | Yes         | 6.08  | Male   | Yes          | 106.82      | Purebred                | Mastiff                        | 3.5       | 1.0     | No                             | No                                   | NA          | NA                                | NA                                     | NA                                 | NA         | NA                      | NA                                      | NA                                                 | NA                                             | NA                     | Negative             | No                                         |
| 0322    | Yes      | Laboratory Workflow Deviation | No           | No          | 2.58  | Female | Yes          | 23.09       | Purebred                | Wirehaired Pointing Griffon    | 4.0       | 2.0     | No                             | No                                   | NA          | NA                                | NA                                     | NA                                 | NA         | NA                      | NA                                      | NA                                                 | NA                                             | NA                     | Negative             | No                                         |
| 0323    | No       | NA                            | No           | Yes         | 4.58  | Male   | Yes          | 37.27       | Purebred                | Golden Retriever               | 1.0       | 1.0     | No                             | No                                   | NA          | NA                                | NA                                     | NA                                 | NA         | NA                      | NA                                      | NA                                                 | NA                                             | NA                     | Negative             | No                                         |
| 0324    | No       | NA                            | No           | Yes         | 1.33  | Male   | Yes          | 31.91       | Mixed-breed             | NA                             | 3.0       | 2.0     | No                             | No                                   | NA          | NA                                | NA                                     | NA                                 | NA         | NA                      | NA                                      | NA                                                 | NA                                             | NA                     | Negative             | No                                         |
| 0325    | No       | NA                            | No           | Yes         | 7.00  | Female | Yes          | 37.27       | Purebred                | Golden Retriever               | 2.0       | 1.5     | No                             | No                                   | NA          | NA                                | NA                                     | NA                                 | NA         | NA                      | NA                                      | NA                                                 | NA                                             | NA                     | Negative             | No                                         |
| 0326    | No       | NA                            | No           | Yes         | 1.08  | Male   | Yes          | 32.23       | Mixed-breed             | NA                             | 1.0       | 1.0     | No                             | No                                   | NA          | NA                                | NA                                     | NA                                 | NA         | NA                      | NA                                      | NA                                                 | NA                                             | NA                     | Positive             | No                                         |
| 0327    | No       | NA                            | No           | Yes         | 7.42  | Female | Yes          | 35.23       | Purebred                | Golden Retriever               | 3.0       | 1.0     | No                             | No                                   | NA          | NA                                | NA                                     | NA                                 | NA         | NA                      | NA                                      | NA                                                 | NA                                             | NA                     | Negative             | No                                         |
| 0328    | No       | NA                            | Yes          | No          | 12.33 | Male   | Yes          | 17.05       | Purebred                | Border Collie                  | 2.0       | 1.0     | No                             | No                                   | NA          | NA                                | NA                                     | NA                                 | NA         | NA                      | NA                                      | NA                                                 | NA                                             | NA                     | Negative             | No                                         |
| 0329    | No       | NA                            | No           | Yes         | 2.25  | Female | Yes          | 25.23       | Purebred                | Labrador Retriever             | 2.0       | 1.0     | No                             | No                                   | NA          | NA                                | NA                                     | NA                                 | NA         | NA                      | NA                                      | NA                                                 | NA                                             | NA                     | Negative             | No                                         |
| 0330    | No       | NA                            | No           | Yes         | 2.50  | Male   | Yes          | 22.82       | Purebred                | Welsh Springer Spaniel         | 2.0       | 1.0     | No                             | No                                   | NA          | NA                                | NA                                     | NA                                 | NA         | NA                      | NA                                      | NA                                                 | NA                                             | NA                     | Negative             | No                                         |
| 0331    | No       | NA                            | No           | Yes         | 4.00  | Female | Yes          | 22.73       | Purebred                | Australian Cattle Dog          | 3.5       | 2.0     | No                             | No                                   | NA          | NA                                | NA                                     | NA                                 | NA         | NA                      | NA                                      | NA                                                 | NA                                             | NA                     | Negative             | No                                         |
| 0332    | No       | NA                            | No           | Yes         | 3.00  | Male   | Yes          | 37.73       | Mixed-breed             | NA                             | 4.0       | 2.0     | No                             | No                                   | NA          | NA                                | NA                                     | NA                                 | NA         | NA                      | NA                                      | NA                                                 | NA                                             | NA                     | Negative             | No                                         |
| 0333    | No       | NA                            | Yes          | No          | 12.50 | Male   | Yes          | 13.09       | Mixed-breed             | NA                             | 2.0       | 2.0     | No                             | No                                   | NA          | NA                                | NA                                     | NA                                 | NA         | NA                      | NA                                      | NA                                                 | NA                                             | NA                     | Negative             | No                                         |
| 0334    | No       | NA                            | No           | Yes         | 8.00  | Female | Yes          | 26.95       | Mixed-breed             | NA                             | 1.0       | 0.0     | No                             | No                                   | NA          | NA                                | NA                                     | NA                                 | NA         | NA                      | NA                                      | NA                                                 | NA                                             | NA                     | Positive             | No                                         |
| 0335    | No       | NA                            | No           | Yes         | 8.00  | Male   | Yes          | 38.59       | Purebred                | Golden Retriever               | 2.5       | 1.0     | No                             | No                                   | NA          | NA                                | NA                                     | NA                                 | NA         | NA                      | NA                                      | NA                                                 | NA                                             | NA                     | Negative             | No                                         |
| 0336    | Yes      | Test failure                  | No           | No          | 7.08  | Male   | Yes          | 40.18       | Mixed-breed             | NA                             | 2.0       | 2.0     | No                             | No                                   | NA          | NA                                | NA                                     | NA                                 | NA         | NA                      | NA                                      | NA                                                 | NA                                             | NA                     | Fail                 | No                                         |
| 0337    | No       | NA                            | No           | Yes         | 3.00  | Male   | Yes          | 11.59       | Mixed-breed             | NA                             | 3.0       | 2.0     | No                             | No                                   | NA          | NA                                | NA                                     | NA                                 | NA         | NA                      | NA                                      | NA                                                 | NA                                             | NA                     | Negative             | No                                         |
| 0338    | No       | NA                            | Yes          | No          | 12.00 | Male   | Yes          | 16.14       | Mixed-breed             | NA                             | 2.0       | 1.0     | No                             | No                                   | NA          | NA                                | NA                                     | NA                                 | NA         | NA                      | NA                                      | NA                                                 | NA                                             | NA                     | Negative             | No                                         |
| 0339    | No       | NA                            | No           | Yes         | 2.33  | Male   | Yes          | 11.45       | Mixed-breed             | NA                             | 3.5       | 1.5     | No                             | No                                   | NA          | NA                                | NA                                     | NA                                 | NA         | NA                      | NA                                      | NA                                                 | NA                                             | NA                     | Negative             | No                                         |
| 0340    | No       | NA                            | Yes          | No          | 11.08 | Male   | Yes          | 27.23       | Mixed-breed             | NA                             | 2.0       | 2.0     | No                             | No                                   | NA          | NA                                | NA                                     | NA                                 | NA         | NA                      | NA                                      | NA                                                 | NA                                             | NA                     | Negative             | No                                         |
| 0341    | Yes      | Laboratory Workflow Deviation | No           | No          | 10.50 | Male   | Yes          | 12.27       | Purebred                | Australian Shepherd            | 4.0       | 2.0     | No                             | No                                   | NA          | NA                                | NA                                     | NA                                 | NA         | NA                      | NA                                      | NA                                                 | NA                                             | NA                     | Negative             | No                                         |
| 0342    | No       | NA                            | No           | Yes         | 7.00  | Male   | Yes          | 36.45       | Mixed-breed             | NA                             | 4.0       | 2.0     | No                             | No                                   | NA          | NA                                | NA                                     | NA                                 | NA         | NA                      | NA                                      | NA                                                 | NA                                             | NA                     | Negative             | No                                         |
| 0343    | No       | NA                            | Yes          | No          | 5.50  | Female | Yes          | 27.45       | Mixed-breed             | NA                             | 3.0       | 2.0     | No                             | No                                   | NA          | NA                                | NA                                     | NA                                 | NA         | NA                      | NA                                      | NA                                                 | NA                                             | NA                     | Negative             | No                                         |
| 0344    | No       | NA                            | No           | Yes         | 2.58  | Male   | Yes          | 34.09       | Purebred                | Golden Retriever               | 2.5       | 1.0     | No                             | No                                   | NA          | NA                                | NA                                     | NA                                 | NA         | NA                      | NA                                      | NA                                                 | NA                                             | NA                     | Negative             | No                                         |
| 0345    | No       | NA                            | No           | Yes         | 2.42  | Male   | No           | 29.77       | Purebred                | Labrador Retriever             | 4.0       | 2.0     | No                             | No                                   | NA          | NA                                | NA                                     | NA                                 | NA         | NA                      | NA                                      | NA                                                 | NA                                             | NA                     | Negative             | No                                         |
| 0351    | No       | NA                            | No           | Yes         | 10.42 | Female | Yes          | 29.09       | Purebred                | Labrador Retriever             | 4.0       | 2.0     | No                             | No                                   | NA          | NA                                | NA                                     | NA                                 | NA         | NA                      | NA                                      | NA                                                 | NA                                             | NA                     | Negative             | No                                         |
| 0352    | Yes      | Laboratory Workflow Deviation | No           | No          | 1.25  | Female | No           | 15.00       | Purebred                | French Bulldog                 | 4.0       | 2.0     | No                             | No                                   | NA          | NA                                | NA                                     | NA                                 | NA         | NA                      | NA                                      | NA                                                 | NA                                             | NA                     | Negative             | No                                         |
| 0353    | No       | NA                            | No           | Yes         |       |        |              |             |                         |                                |           |         |                                |                                      |             |                                   |                                        |                                    |            |                         |                                         |                                                    |                                                |                        |                      |                                            |

See legend on last page.

| Subject | Excluded | Reason for Exclusion             | Training Set | Testing Set | Age   | Sex    | Spay/ Neuter | Weight (kg) | Purebred or Mixed Breed | Breed (Purebred)               | Hemolysis | Lipemia | Cancer Diagnosis at Enrollment | Cancer Diagnosed after Liquid Biopsy | Cancer Type | Immunophenotype (Lymphoid Cancer) | Extent of Disease: Non-Lymphoid Cancer | Extent of Disease: Lymphoid Cancer | Tumor Size | Cancer Type (Cancer #2) | Immunophenotype (Cancer #2 if Lymphoid) | Extent of Disease: Non-Lymphoid Cancer (Cancer #2) | Extent of Disease: Lymphoid Cancer (Cancer #2) | Tumor Size (Cancer #2) | Liquid Biopsy Result | CSO Prediction of Hematological Malignancy |    |
|---------|----------|----------------------------------|--------------|-------------|-------|--------|--------------|-------------|-------------------------|--------------------------------|-----------|---------|--------------------------------|--------------------------------------|-------------|-----------------------------------|----------------------------------------|------------------------------------|------------|-------------------------|-----------------------------------------|----------------------------------------------------|------------------------------------------------|------------------------|----------------------|--------------------------------------------|----|
| 0356    | No       | NA                               | No           | Yes         | 6.58  | Male   | Yes          | 36.45       | Purebred                | Labrador Retriever             | 3.0       | 1.0     | No                             | No                                   | NA          | NA                                | NA                                     | NA                                 | NA         | NA                      | NA                                      | NA                                                 | NA                                             | NA                     | Negative             | No                                         |    |
| 0357    | No       | NA                               | No           | Yes         | 7.58  | Female | Yes          | 8.82        | Purebred                | Shih Tzu                       | 3.0       | 1.5     | No                             | No                                   | NA          | NA                                | NA                                     | NA                                 | NA         | NA                      | NA                                      | NA                                                 | NA                                             | NA                     | Negative             | No                                         |    |
| 0358    | No       | NA                               | No           | Yes         | 6.92  | Male   | Yes          | 39.55       | Purebred                | Greyhound                      | 4.0       | 1.0     | No                             | No                                   | NA          | NA                                | NA                                     | NA                                 | NA         | NA                      | NA                                      | NA                                                 | NA                                             | NA                     | Negative             | No                                         |    |
| 0359    | No       | NA                               | No           | Yes         | 2.50  | Male   | Yes          | 36.36       | Mixed-breed             | NA                             | 2.0       | 1.0     | No                             | No                                   | NA          | NA                                | NA                                     | NA                                 | NA         | NA                      | NA                                      | NA                                                 | NA                                             | NA                     | Negative             | No                                         |    |
| 0360    | No       | NA                               | Yes          | No          | 3.50  | Female | No           | 30.56       | Purebred                | Golden Retriever               | 1.0       | 0.0     | No                             | No                                   | NA          | NA                                | NA                                     | NA                                 | NA         | NA                      | NA                                      | NA                                                 | NA                                             | NA                     | Negative             | No                                         |    |
| 0361    | No       | NA                               | No           | Yes         | 5.92  | Male   | Yes          | 54.09       | Purebred                | Bloodhound                     | 0.5       | 1.0     | No                             | No                                   | NA          | NA                                | NA                                     | NA                                 | NA         | NA                      | NA                                      | NA                                                 | NA                                             | NA                     | Negative             | No                                         |    |
| 0362    | No       | NA                               | No           | Yes         | 11.00 | Male   | Yes          | 36.23       | Purebred                | Pointer                        | 2.0       | 2.0     | No                             | No                                   | NA          | NA                                | NA                                     | NA                                 | NA         | NA                      | NA                                      | NA                                                 | NA                                             | NA                     | Negative             | No                                         |    |
| 0363    | No       | NA                               | No           | Yes         | 5.75  | Female | Yes          | 41.41       | Purebred                | Bloodhound                     | 2.5       | 2.0     | No                             | No                                   | NA          | NA                                | NA                                     | NA                                 | NA         | NA                      | NA                                      | NA                                                 | NA                                             | NA                     | Negative             | No                                         |    |
| 0364    | No       | NA                               | No           | Yes         | 1.58  | Female | Yes          | 17.77       | Mixed-breed             | NA                             | 1.0       | 2.0     | No                             | No                                   | NA          | NA                                | NA                                     | NA                                 | NA         | NA                      | NA                                      | NA                                                 | NA                                             | NA                     | Negative             | No                                         |    |
| 0365    | No       | NA                               | Yes          | No          | 14.17 | Female | Yes          | 37.91       | Mixed-breed             | NA                             | 1.0       | 1.0     | No                             | No                                   | NA          | NA                                | NA                                     | NA                                 | NA         | NA                      | NA                                      | NA                                                 | NA                                             | NA                     | Negative             | No                                         |    |
| 0366    | No       | NA                               | Yes          | No          | 7.00  | Female | Yes          | 17.77       | Mixed-breed             | NA                             | 2.0       | 2.0     | No                             | No                                   | NA          | NA                                | NA                                     | NA                                 | NA         | NA                      | NA                                      | NA                                                 | NA                                             | NA                     | Negative             | No                                         |    |
| 0367    | No       | NA                               | No           | Yes         | 7.50  | Female | Yes          | 50.68       | Purebred                | Akita                          | 2.0       | 1.0     | No                             | No                                   | NA          | NA                                | NA                                     | NA                                 | NA         | NA                      | NA                                      | NA                                                 | NA                                             | NA                     | Negative             | No                                         |    |
| 0368    | Yes      | Laboratory Workflow Deviation    | No           | No          | 4.25  | Male   | Yes          | 29.77       | Mixed-breed             | NA                             | 4.0       | 2.0     | No                             | No                                   | NA          | NA                                | NA                                     | NA                                 | NA         | NA                      | NA                                      | NA                                                 | NA                                             | NA                     | Negative             | No                                         |    |
| 0369    | No       | NA                               | No           | Yes         | 3.83  | Female | Yes          | 15.82       | Mixed-breed             | NA                             | 3.5       | 2.0     | No                             | No                                   | NA          | NA                                | NA                                     | NA                                 | NA         | NA                      | NA                                      | NA                                                 | NA                                             | NA                     | Negative             | No                                         |    |
| 0370    | No       | NA                               | Yes          | No          | 5.92  | Female | Yes          | 42.50       | Purebred                | Rottweiler                     | 1.0       | 1.0     | No                             | No                                   | NA          | NA                                | NA                                     | NA                                 | NA         | NA                      | NA                                      | NA                                                 | NA                                             | NA                     | Negative             | No                                         |    |
| 0371    | No       | NA                               | No           | Yes         | 11.92 | Female | Yes          | 17.54       | Purebred                | Silken Windhound               | 3.5       | 1.0     | No                             | No                                   | NA          | NA                                | NA                                     | NA                                 | NA         | NA                      | NA                                      | NA                                                 | NA                                             | NA                     | Negative             | No                                         |    |
| 0372    | No       | NA                               | Yes          | No          | 5.83  | Female | Yes          | 26.45       | Purebred                | Golden Retriever               | 3.0       | 2.0     | No                             | No                                   | NA          | NA                                | NA                                     | NA                                 | NA         | NA                      | NA                                      | NA                                                 | NA                                             | NA                     | Negative             | No                                         |    |
| 0373    | No       | NA                               | Yes          | No          | 6.75  | Female | Yes          | 32.45       | Purebred                | Golden Retriever               | 2.0       | 1.0     | No                             | No                                   | NA          | NA                                | NA                                     | NA                                 | NA         | NA                      | NA                                      | NA                                                 | NA                                             | NA                     | Negative             | No                                         |    |
| 0374    | No       | NA                               | No           | Yes         | 7.75  | Female | Yes          | 37.18       | Mixed-breed             | NA                             | 2.0       | 0.0     | No                             | Yes                                  | NA          | NA                                | NA                                     | NA                                 | NA         | NA                      | NA                                      | NA                                                 | NA                                             | NA                     | Positive             | No                                         |    |
| 0375    | No       | NA                               | Yes          | No          | 6.00  | Male   | Yes          | 44.18       | Mixed-breed             | NA                             | 3.5       | 2.0     | No                             | No                                   | NA          | NA                                | NA                                     | NA                                 | NA         | NA                      | NA                                      | NA                                                 | NA                                             | NA                     | Negative             | No                                         |    |
| 0376    | No       | NA                               | Yes          | No          | 1.00  | Female | Yes          | 27.05       | Mixed-breed             | NA                             | 2.5       | 2.0     | No                             | No                                   | NA          | NA                                | NA                                     | NA                                 | NA         | NA                      | NA                                      | NA                                                 | NA                                             | NA                     | Negative             | No                                         |    |
| 0377    | No       | NA                               | No           | Yes         | 5.00  | Male   | No           | 68.32       | Purebred                | Mastiff                        | 1.5       | 1.0     | No                             | No                                   | NA          | NA                                | NA                                     | NA                                 | NA         | NA                      | NA                                      | NA                                                 | NA                                             | NA                     | Negative             | No                                         |    |
| 0378    | No       | NA                               | No           | Yes         | 9.42  | Male   | Yes          | 43.18       | Purebred                | Labrador Retriever             | 4.0       | 2.0     | No                             | No                                   | NA          | NA                                | NA                                     | NA                                 | NA         | NA                      | NA                                      | NA                                                 | NA                                             | NA                     | Negative             | No                                         |    |
| 0379    | No       | NA                               | No           | Yes         | 1.92  | Male   | Yes          | 30.18       | Purebred                | Labrador Retriever             | 3.0       | 1.0     | No                             | No                                   | NA          | NA                                | NA                                     | NA                                 | NA         | NA                      | NA                                      | NA                                                 | NA                                             | NA                     | Negative             | No                                         |    |
| 0380    | No       | NA                               | No           | Yes         | 6.00  | Female | Yes          | 14.23       | Purebred                | Pembroke Welsh Corgi           | 3.5       | 2.0     | No                             | No                                   | NA          | NA                                | NA                                     | NA                                 | NA         | NA                      | NA                                      | NA                                                 | NA                                             | NA                     | Negative             | No                                         |    |
| 0381    | No       | NA                               | Yes          | No          | 4.42  | Female | Yes          | 29.45       | Purebred                | German Shepherd                | 3.0       | 1.0     | No                             | No                                   | NA          | NA                                | NA                                     | NA                                 | NA         | NA                      | NA                                      | NA                                                 | NA                                             | NA                     | Negative             | No                                         |    |
| 0382    | No       | NA                               | No           | Yes         | 12.33 | Female | Yes          | 21.36       | Purebred                | Golden Retriever               | 1.5       | 1.0     | No                             | No                                   | NA          | NA                                | NA                                     | NA                                 | NA         | NA                      | NA                                      | NA                                                 | NA                                             | NA                     | Negative             | No                                         |    |
| 0383    | No       | NA                               | No           | Yes         | 5.17  | Male   | Yes          | 33.82       | Purebred                | Boxer                          | 3.0       | 1.0     | No                             | No                                   | NA          | NA                                | NA                                     | NA                                 | NA         | NA                      | NA                                      | NA                                                 | NA                                             | NA                     | Positive             | No                                         |    |
| 0384    | No       | NA                               | No           | Yes         | 5.25  | Female | Yes          | 12.05       | Purebred                | Australian Cattle Dog          | 3.0       | 1.0     | No                             | No                                   | NA          | NA                                | NA                                     | NA                                 | NA         | NA                      | NA                                      | NA                                                 | NA                                             | NA                     | Negative             | No                                         |    |
| 0385    | No       | NA                               | No           | Yes         | 3.00  | Female | Yes          | 21.77       | Purebred                | Anatolian Shepherd             | 1.0       | 1.0     | No                             | No                                   | NA          | NA                                | NA                                     | NA                                 | NA         | NA                      | NA                                      | NA                                                 | NA                                             | NA                     | Negative             | No                                         |    |
| 0386    | Yes      | Enrollment or Clinical Deviation | No           | No          | 6.00  | Male   | Yes          | 24.05       | Purebred                | Poodle, Standard               | 1.0       | 1.0     | No                             | No                                   | NA          | NA                                | NA                                     | NA                                 | NA         | NA                      | NA                                      | NA                                                 | NA                                             | NA                     | Negative             | No                                         |    |
| 0387    | No       | NA                               | No           | Yes         | 5.50  | Male   | No           | 34.07       | Purebred                | Golden Retriever               | 2.5       | 2.0     | No                             | No                                   | NA          | NA                                | NA                                     | NA                                 | NA         | NA                      | NA                                      | NA                                                 | NA                                             | NA                     | Negative             | No                                         |    |
| 0388    | No       | NA                               | No           | Yes         | 3.50  | Male   | No           | 33.27       | Purebred                | Golden Retriever               | 1.0       | 2.0     | No                             | No                                   | NA          | NA                                | NA                                     | NA                                 | NA         | NA                      | NA                                      | NA                                                 | NA                                             | NA                     | Negative             | No                                         |    |
| 0389    | No       | NA                               | No           | Yes         | 3.08  | Male   | Yes          | 30.36       | Mixed-breed             | NA                             | 4.0       | 2.0     | No                             | No                                   | NA          | NA                                | NA                                     | NA                                 | NA         | NA                      | NA                                      | NA                                                 | NA                                             | NA                     | Negative             | No                                         |    |
| 0390    | No       | NA                               | No           | Yes         | 5.08  | Female | Yes          | 21.45       | Purebred                | Belgian Malinois               | 3.5       | 2.0     | No                             | No                                   | NA          | NA                                | NA                                     | NA                                 | NA         | NA                      | NA                                      | NA                                                 | NA                                             | NA                     | Negative             | No                                         |    |
| 0391    | No       | NA                               | No           | Yes         | 7.25  | Female | Yes          | 18.00       | Mixed-breed             | NA                             | 4.0       | 2.0     | No                             | No                                   | NA          | NA                                | NA                                     | NA                                 | NA         | NA                      | NA                                      | NA                                                 | NA                                             | NA                     | Negative             | No                                         |    |
| 0392    | No       | NA                               | No           | Yes         | 2.33  | Female | Yes          | 11.05       | Mixed-breed             | NA                             | 4.0       | 2.0     | No                             | No                                   | NA          | NA                                | NA                                     | NA                                 | NA         | NA                      | NA                                      | NA                                                 | NA                                             | NA                     | Negative             | No                                         |    |
| 0393    | No       | NA                               | No           | Yes         | 2.17  | Male   | Yes          | 22.41       | Purebred                | Basset Hound                   | 3.0       | 2.0     | No                             | No                                   | NA          | NA                                | NA                                     | NA                                 | NA         | NA                      | NA                                      | NA                                                 | NA                                             | NA                     | Negative             | No                                         |    |
| 0394    | Yes      | Laboratory Workflow Deviation    | No           | No          | 7.00  | Female | Yes          | 66.64       | Purebred                | Irish Wolfhound                | 4.0       | 1.0     | No                             | No                                   | NA          | NA                                | NA                                     | NA                                 | NA         | NA                      | NA                                      | NA                                                 | NA                                             | NA                     | NA                   | Negative                                   | No |
| 0395    | No       | NA                               | No           | Yes         | 1.50  | Male   | No           | 19.84       | Purebred                | Stabyhoun                      | 4.0       | 2.0     | No                             | No                                   | NA          | NA                                | NA                                     | NA                                 | NA         | NA                      | NA                                      | NA                                                 | NA                                             | NA                     | Negative             | No                                         |    |
| 0396    | No       | NA                               | No           | Yes         | 4.50  | Male   | Yes          | 32.18       | Purebred                | Gordon Setter                  | 3.0       | 1.0     | No                             | No                                   | NA          | NA                                | NA                                     | NA                                 | NA         | NA                      | NA                                      | NA                                                 | NA                                             | NA                     | Negative             | No                                         |    |
| 0397    | Yes      | Laboratory Workflow Deviation    | No           | No          | 8.25  | Male   | Yes          | 12.27       | Mixed-breed             | NA                             | 4.0       | 2.0     | No                             | No                                   | NA          | NA                                | NA                                     | NA                                 | NA         | NA                      | NA                                      | NA                                                 | NA                                             | NA                     | Negative             | No                                         |    |
| 0398    | No       | NA                               | Yes          | No          | 3.75  | Male   | Yes          | 46.45       | Purebred                | Chesapeake Bay Retriever       | 3.0       | 2.0     | No                             | No                                   | NA          | NA                                | NA                                     | NA                                 | NA         | NA                      | NA                                      | NA                                                 | NA                                             | NA                     | Negative             | No                                         |    |
| 0399    | No       | NA                               | Yes          | No          | 7.00  | Female | Yes          | 75.16       | Purebred                | German Shepherd                | 3.0       | 2.0     | No                             | No                                   | NA          | NA                                | NA                                     | NA                                 | NA         | NA                      | NA                                      | NA                                                 | NA                                             | NA                     | Negative             | No                                         |    |
| 0400    | Yes      | Test failure                     | No           | No          | 15.08 | Male   | Yes          | 13.68       | Purebred                | Dachshund                      | 4.0       | 2.0     | No                             | No                                   | NA          | NA                                | NA                                     | NA                                 | NA         | NA                      | NA                                      | NA                                                 | NA                                             | NA                     | Negative             | No                                         |    |
| 0401    | No       | NA                               | No           | Yes         | 2.50  | Male   | Yes          | 29.64       | Purebred                | Poodle, Standard               | 2.0       | 2.0     | No                             | No                                   | NA          | NA                                | NA                                     | NA                                 | NA         | NA                      | NA                                      | NA                                                 | NA                                             | NA                     | Negative             | No                                         |    |
| 0402    | No       | NA                               | No           | Yes         | 4.17  | Female | Yes          | 31.77       | Purebred                | Labrador Retriever             | 3.0       | 0.5     | No                             | No                                   | NA          | NA                                | NA                                     | NA                                 | NA         | NA                      | NA                                      | NA                                                 | NA                                             | NA                     | Negative             | No                                         |    |
| 0403    | No       | NA                               | No           | Yes         | 4.25  | Female | Yes          | 38.18       | Mixed-breed             | NA                             | 4.0       | 2.0     | No                             | No                                   | NA          | NA                                | NA                                     | NA                                 | NA         | NA                      | NA                                      | NA                                                 | NA                                             | NA                     | Negative             | No                                         |    |
| 0404    | No       | NA                               | No           | Yes         | 1.17  | Male   | Yes          | 37.09       | Mixed-breed             | NA                             | 1.5       | 1.0     | No                             | No                                   | NA          | NA                                | NA                                     | NA                                 | NA         | NA                      | NA                                      | NA                                                 | NA                                             | NA                     | Negative             | No                                         |    |
| 0405    | No       | NA                               | No           | Yes         | 5.08  | Male   | Yes          | 30.82       | Purebred                | Golden Retriever               | 4.0       | 2.0     | No                             | No                                   | NA          | NA                                | NA                                     | NA                                 | NA         | NA                      | NA                                      | NA                                                 | NA                                             | NA                     | Negative             | No                                         |    |
| 0406    | No       | NA                               | No           | Yes         | 8.92  | Male   | Yes          | 11.09       | Mixed-breed             | NA                             | 2.5       | 1.0     | No                             | No                                   | NA          | NA                                | NA                                     | NA                                 | NA         | NA                      | NA                                      | NA                                                 | NA                                             | NA                     | Negative             | No                                         |    |
| 0407    | No       | NA                               | No           | Yes         | 1.00  | Male   | Yes          | 36.68       | Purebred                | Labrador Retriever             | 1.0       | 1.0     | No                             | No                                   | NA          | NA                                | NA                                     | NA                                 | NA         | NA                      | NA                                      | NA                                                 | NA                                             | NA                     | Negative             | No                                         |    |
| 0408    | No       | NA                               | No           | Yes         | 1.83  | Female | Yes          | 24.36       | Mixed-breed             | NA                             | 2.5       | 1.0     | No                             | No                                   | NA          | NA                                | NA                                     | NA                                 | NA         | NA                      | NA                                      | NA                                                 | NA                                             | NA                     | Negative             | No                                         |    |
| 0409    | No       | NA                               | Yes          | No          | 7.67  | Female | Yes          | 12.14       | Mixed-breed             | NA                             | 4.0       | 1.0     | No                             | No                                   | NA          | NA                                | NA                                     | NA                                 | NA         | NA                      | NA                                      | NA                                                 | NA                                             | NA                     | Negative             | No                                         |    |
| 0410    | Yes      | Laboratory Workflow Deviation    | No           | No          | 3.92  | Female | Yes          | 11.73       | Mixed-breed             | NA                             | 3.5       | 2.0     | No                             | No                                   | NA          | NA                                | NA                                     | NA                                 | NA         | NA                      | NA                                      | NA                                                 | NA                                             | NA                     | Negative             | No                                         |    |
| 0411    | No       | NA                               | No           | Yes         | 4.33  | Male   | Yes          | 39.77       | Purebred                | American Staffordshire Terrier | 2.0       | 2.0     | No                             | No                                   | NA          | NA                                | NA                                     | NA                                 | NA         | NA                      | NA                                      | NA                                                 | NA                                             | NA                     | Negative             | No                                         |    |
| 0412    | No       | NA                               | No           | Yes         | 4.58  | Male   | Yes          | 31.55       | Purebred                | American Staffordshire Terrier | 3.5       | 2.0     | No                             | No                                   | NA          | NA                                | NA                                     | NA                                 | NA         | NA                      | NA                                      | NA                                                 | NA                                             | NA                     | Negative             | No                                         |    |
| 0413    | No       | NA                               | No           | Yes         | 2.67  | Female | Yes          | 29.64       | Purebred                | Chesapeake Bay Retriever       | 1.0       | 1.0     | No                             | No                                   | NA          | NA                                | NA                                     | NA                                 | NA         | NA                      | NA                                      | NA                                                 | NA                                             | NA                     | Negative             | No                                         |    |
| 0414    | No       | NA                               | Yes          | No          | 8.67  | Female | Yes          | 30.27       | Mixed-breed             | NA                             | 3.0       | 1.0     | No                             | No                                   | NA          | NA                                | NA                                     | NA                                 | NA         | NA                      | NA                                      | NA                                                 | NA                                             | NA                     | Negative             | No                                         |    |
| 0415    | No       | NA                               | No           | Yes         | 4.08  | Male   | Yes          | 24.18       | Purebred                | Australian Shepherd            | 1.5       | 2.0     | No                             | No                                   | NA          | NA                                | NA                                     | NA                                 | NA         | NA                      | NA                                      | NA                                                 | NA                                             | NA                     | Negative             | No                                         |    |
| 0416    | Yes      | Laboratory Workflow Deviation    | No           | No          | 11.75 | Female | Yes          | 24.09       | Mixed-breed             | NA                             | 4.0       | 1.0     | No                             | No                                   | NA          | NA                                | NA                                     | NA                                 | NA         | NA                      | NA                                      | NA                                                 | NA                                             | NA                     | Negative             | No                                         |    |
| 0417    | No       | NA                               | No           | Yes         | 7.67  | Female | Yes          | 17.50       | Mixed-breed             | NA                             | 1.0       | 1.0     | No                             | No                                   | NA          | NA                                | NA                                     | NA                                 | NA         | NA                      | NA                                      | NA                                                 | NA                                             | NA                     | Negative             | No                                         |    |
| 0418    | No       | NA                               | No           | Yes         | 1.33  | Male   | Yes          | 45.45       | Mixed-breed             | NA                             | 1.5       | 1.5     | No                             | No                                   | NA          | NA                                | NA                                     | NA                                 | NA         | NA                      | NA                                      | NA                                                 | NA                                             | NA                     | Negative             | No                                         |    |
| 0419    | No       | NA                               | No           | Yes         | 3.17  | Female | Yes          | 21.14       | Purebred                | Poodle, Standard               | 2.0       | 1.0     | No                             | No                                   | NA          | NA                                | NA                                     | NA                                 | NA         | NA                      | NA                                      | NA                                                 | NA                                             | NA                     | Negative             | No                                         |    |
| 0420    | Yes      | Test failure                     | No           | No          | 6.83  | Female | Yes          | 28.76       | Purebred                | English Bulldog                | 4.0       | 2.0     | No                             | No                                   | NA          | NA                                | NA                                     | NA                                 | NA         | NA                      | NA                                      | NA                                                 | NA                                             | NA                     | Fail                 | No                                         |    |
| 0421    | No       | NA                               | No           | Yes         | 5.42  | Female | Yes          | 31.18       | Purebred                | Golden Retriever               | 3.0       | 2.0     | No                             | No                                   | NA          | NA                                | NA                                     | NA                                 | NA         | NA                      | NA                                      | NA                                                 | NA                                             | NA                     | Negative             | No                                         |    |
| 0422    | Yes      | Laboratory Workflow Deviation    | No           | No          | 4.00  | Male   | Yes          | 16.14       | Mixed-breed             | NA                             | 3.0       | 2.0     | No                             | No                                   | NA          | NA                                | NA                                     | NA                                 | NA         | NA                      | NA                                      | NA                                                 | NA                                             | NA                     | Negative             | No                                         |    |

S1 Table. Full subject level data for subjects enrolled in the CANDiD study (continued)

See legend on last page.

| Subject | Excluded | Reason for Exclusion            | Training Set | Testing Set | Age   | Sex    | Spay/ Neuter | Weight (kg) | Purebred or Mixed Breed | Breed (Purebred)               | Hemolysis | Lipemia | Cancer Diagnosis at Enrollment | Cancer Diagnosed after Liquid Biopsy | Cancer Type | Immunophenotype (Lymphoid Cancer) | Extent of Disease: Non-Lymphoid Cancer | Extent of Disease: Lymphoid Cancer | Tumor Size | Cancer Type (Cancer #2) | Immunophenotype (Cancer #2 if Lymphoid) | Extent of Disease: Non-Lymphoid Cancer (Cancer #2) | Extent of Disease: Lymphoid Cancer (Cancer #2) | Tumor Size (Cancer #2) | Liquid Biopsy Result | CSO Prediction of Hematological Malignancy |
|---------|----------|---------------------------------|--------------|-------------|-------|--------|--------------|-------------|-------------------------|--------------------------------|-----------|---------|--------------------------------|--------------------------------------|-------------|-----------------------------------|----------------------------------------|------------------------------------|------------|-------------------------|-----------------------------------------|----------------------------------------------------|------------------------------------------------|------------------------|----------------------|--------------------------------------------|
| 0423    | No       | NA                              | No           | Yes         | 4.67  | Male   | Yes          | 40.18       | Mixed-breed             | NA                             | 2.0       | 1.0     | No                             | No                                   | NA          | NA                                | NA                                     | NA                                 | NA         | NA                      | NA                                      | NA                                                 | NA                                             | NA                     | Negative             | No                                         |
| 0424    | No       | NA                              | No           | Yes         | 2.00  | Male   | Yes          | 28.73       | Mixed-breed             | NA                             | 3.5       | 1.0     | No                             | No                                   | NA          | NA                                | NA                                     | NA                                 | NA         | NA                      | NA                                      | NA                                                 | NA                                             | NA                     | Negative             | No                                         |
| 0425    | No       | NA                              | No           | Yes         | 2.50  | Male   | Yes          | 52.73       | Purebred                | Great Dane                     | 1.5       | 1.0     | No                             | No                                   | NA          | NA                                | NA                                     | NA                                 | NA         | NA                      | NA                                      | NA                                                 | NA                                             | NA                     | Negative             | No                                         |
| 0426    | No       | NA                              | No           | Yes         | 2.00  | Female | Yes          | 16.32       | Purebred                | Border Collie                  | 3.0       | 1.0     | No                             | No                                   | NA          | NA                                | NA                                     | NA                                 | NA         | NA                      | NA                                      | NA                                                 | NA                                             | NA                     | Negative             | No                                         |
| 0427    | Yes      | Laboratory Workflow Deviation   | No           | No          | 4.58  | Female | Yes          | 28.27       | Purebred                | Boxer                          | 3.5       | 2.0     | No                             | No                                   | NA          | NA                                | NA                                     | NA                                 | NA         | NA                      | NA                                      | NA                                                 | NA                                             | NA                     | Negative             | No                                         |
| 0428    | No       | NA                              | No           | Yes         | 3.08  | Male   | Yes          | 36.95       | Purebred                | Labrador Retriever             | 1.0       | 1.0     | No                             | No                                   | NA          | NA                                | NA                                     | NA                                 | NA         | NA                      | NA                                      | NA                                                 | NA                                             | NA                     | Negative             | No                                         |
| 0429    | No       | NA                              | No           | Yes         | 1.58  | Male   | Yes          | 40.14       | Purebred                | Golden Retriever               | 1.5       | 1.0     | No                             | No                                   | NA          | NA                                | NA                                     | NA                                 | NA         | NA                      | NA                                      | NA                                                 | NA                                             | NA                     | Negative             | No                                         |
| 0430    | No       | NA                              | No           | Yes         | 6.08  | Male   | Yes          | 27.86       | Mixed-breed             | NA                             | 2.0       | 1.0     | No                             | No                                   | NA          | NA                                | NA                                     | NA                                 | NA         | NA                      | NA                                      | NA                                                 | NA                                             | NA                     | Negative             | No                                         |
| 0431    | No       | NA                              | No           | Yes         | 6.00  | Male   | Yes          | 12.27       | Mixed-breed             | NA                             | 2.5       | 1.5     | No                             | No                                   | NA          | NA                                | NA                                     | NA                                 | NA         | NA                      | NA                                      | NA                                                 | NA                                             | NA                     | Negative             | No                                         |
| 0432    | Yes      | Enrolment or Clinical Deviation | No           | No          | 10.00 | Female | Yes          | 21.14       | Purebred                | Australian Shepherd            | 2.0       | 0.0     | No                             | No                                   | NA          | NA                                | NA                                     | NA                                 | NA         | NA                      | NA                                      | NA                                                 | NA                                             | NA                     | Negative             | No                                         |
| 0433    | No       | NA                              | No           | Yes         | 5.00  | Male   | Yes          | 40.45       | Mixed-breed             | NA                             | 2.5       | 1.0     | No                             | No                                   | NA          | NA                                | NA                                     | NA                                 | NA         | NA                      | NA                                      | NA                                                 | NA                                             | NA                     | Negative             | No                                         |
| 0434    | No       | NA                              | Yes          | No          | 8.33  | Male   | Yes          | 39.64       | Purebred                | Labrador Retriever             | 3.0       | 2.0     | No                             | No                                   | NA          | NA                                | NA                                     | NA                                 | NA         | NA                      | NA                                      | NA                                                 | NA                                             | NA                     | Negative             | No                                         |
| 0435    | No       | NA                              | No           | Yes         | 4.33  | Female | Yes          | 6.73        | Purebred                | Australian Terrier             | 2.0       | 1.0     | No                             | No                                   | NA          | NA                                | NA                                     | NA                                 | NA         | NA                      | NA                                      | NA                                                 | NA                                             | NA                     | Negative             | No                                         |
| 0436    | No       | NA                              | No           | Yes         | 4.92  | Female | Yes          | 22.27       | Mixed-breed             | NA                             | 2.0       | 1.0     | No                             | No                                   | NA          | NA                                | NA                                     | NA                                 | NA         | NA                      | NA                                      | NA                                                 | NA                                             | NA                     | Negative             | No                                         |
| 0437    | No       | NA                              | No           | Yes         | 3.75  | Female | Yes          | 29.64       | Purebred                | Bull Terrier                   | 1.0       | 1.0     | No                             | No                                   | NA          | NA                                | NA                                     | NA                                 | NA         | NA                      | NA                                      | NA                                                 | NA                                             | NA                     | Negative             | No                                         |
| 0438    | No       | NA                              | No           | Yes         | 4.75  | Male   | Yes          | 13.55       | Purebred                | Australian Cattle Dog          | 3.0       | 1.0     | No                             | No                                   | NA          | NA                                | NA                                     | NA                                 | NA         | NA                      | NA                                      | NA                                                 | NA                                             | NA                     | Negative             | No                                         |
| 0439    | No       | NA                              | No           | Yes         | 1.33  | Female | No           | 11.00       | Purebred                | Whippet                        | 3.0       | 2.0     | No                             | No                                   | NA          | NA                                | NA                                     | NA                                 | NA         | NA                      | NA                                      | NA                                                 | NA                                             | NA                     | Negative             | No                                         |
| 0440    | No       | NA                              | No           | Yes         | 3.42  | Female | Yes          | 10.55       | Mixed-breed             | NA                             | 3.5       | 2.0     | No                             | No                                   | NA          | NA                                | NA                                     | NA                                 | NA         | NA                      | NA                                      | NA                                                 | NA                                             | NA                     | Negative             | No                                         |
| 0441    | No       | NA                              | No           | Yes         | 3.75  | Male   | Yes          | 25.77       | Purebred                | Australian Cattle Dog          | 4.0       | 2.0     | No                             | No                                   | NA          | NA                                | NA                                     | NA                                 | NA         | NA                      | NA                                      | NA                                                 | NA                                             | NA                     | Negative             | No                                         |
| 0442    | No       | NA                              | No           | Yes         | 14.00 | Female | Yes          | 27.41       | Mixed-breed             | NA                             | 1.5       | 1.0     | No                             | No                                   | NA          | NA                                | NA                                     | NA                                 | NA         | NA                      | NA                                      | NA                                                 | NA                                             | NA                     | Positive             | No                                         |
| 0443    | No       | NA                              | No           | Yes         | 2.00  | Female | Yes          | 25.68       | Mixed-breed             | NA                             | 1.0       | 1.0     | No                             | No                                   | NA          | NA                                | NA                                     | NA                                 | NA         | NA                      | NA                                      | NA                                                 | NA                                             | NA                     | Negative             | No                                         |
| 0444    | No       | NA                              | Yes          | No          | 7.00  | Male   | Yes          | 12.05       | Mixed-breed             | NA                             | 2.5       | 1.5     | No                             | No                                   | NA          | NA                                | NA                                     | NA                                 | NA         | NA                      | NA                                      | NA                                                 | NA                                             | NA                     | Negative             | No                                         |
| 0445    | No       | NA                              | Yes          | No          | 1.50  | Female | Yes          | 35.41       | Purebred                | Bloodhound                     | 1.0       | 1.0     | No                             | No                                   | NA          | NA                                | NA                                     | NA                                 | NA         | NA                      | NA                                      | NA                                                 | NA                                             | NA                     | Negative             | No                                         |
| 0446    | No       | NA                              | Yes          | No          | 10.00 | Female | Yes          | 30.27       | Mixed-breed             | NA                             | 2.5       | 1.0     | No                             | No                                   | NA          | NA                                | NA                                     | NA                                 | NA         | NA                      | NA                                      | NA                                                 | NA                                             | NA                     | Negative             | No                                         |
| 0447    | No       | NA                              | No           | Yes         | 3.50  | Female | Yes          | 28.27       | Mixed-breed             | NA                             | 4.0       | 2.0     | No                             | No                                   | NA          | NA                                | NA                                     | NA                                 | NA         | NA                      | NA                                      | NA                                                 | NA                                             | NA                     | Negative             | No                                         |
| 0448    | No       | NA                              | No           | Yes         | 7.67  | Female | Yes          | 27.91       | Purebred                | German Shepherd                | 3.0       | 1.0     | No                             | No                                   | NA          | NA                                | NA                                     | NA                                 | NA         | NA                      | NA                                      | NA                                                 | NA                                             | NA                     | Negative             | No                                         |
| 0449    | Yes      | Laboratory Workflow Deviation   | No           | No          | 1.25  | Male   | Yes          | 29.73       | Mixed-breed             | NA                             | 4.0       | 2.0     | No                             | No                                   | NA          | NA                                | NA                                     | NA                                 | NA         | NA                      | NA                                      | NA                                                 | NA                                             | NA                     | Negative             | No                                         |
| 0450    | No       | NA                              | No           | Yes         | 1.00  | Female | No           | 7.73        | Mixed-breed             | NA                             | 1.0       | 1.0     | No                             | No                                   | NA          | NA                                | NA                                     | NA                                 | NA         | NA                      | NA                                      | NA                                                 | NA                                             | NA                     | Negative             | No                                         |
| 0451    | No       | NA                              | No           | Yes         | 9.75  | Male   | No           | 34.18       | Purebred                | Labrador Retriever             | 0.5       | 1.0     | No                             | No                                   | NA          | NA                                | NA                                     | NA                                 | NA         | NA                      | NA                                      | NA                                                 | NA                                             | NA                     | Negative             | No                                         |
| 0452    | No       | NA                              | No           | Yes         | 11.25 | Female | Yes          | 6.91        | Mixed-breed             | NA                             | 2.0       | 2.0     | No                             | No                                   | NA          | NA                                | NA                                     | NA                                 | NA         | NA                      | NA                                      | NA                                                 | NA                                             | NA                     | Negative             | No                                         |
| 0453    | No       | NA                              | Yes          | No          | 12.67 | Male   | Yes          | 6.45        | Purebred                | Shih Tzu                       | 1.0       | 1.0     | No                             | No                                   | NA          | NA                                | NA                                     | NA                                 | NA         | NA                      | NA                                      | NA                                                 | NA                                             | NA                     | Negative             | No                                         |
| 0454    | No       | NA                              | No           | Yes         | 2.50  | Male   | Yes          | 38.18       | Mixed-breed             | NA                             | 1.0       | 1.0     | No                             | No                                   | NA          | NA                                | NA                                     | NA                                 | NA         | NA                      | NA                                      | NA                                                 | NA                                             | NA                     | Negative             | No                                         |
| 0455    | Yes      | Laboratory Workflow Deviation   | No           | No          | 3.58  | Female | Yes          | 28.09       | Mixed-breed             | NA                             | 3.5       | 2.0     | No                             | No                                   | NA          | NA                                | NA                                     | NA                                 | NA         | NA                      | NA                                      | NA                                                 | NA                                             | NA                     | Negative             | No                                         |
| 0456    | No       | NA                              | Yes          | No          | 9.58  | Male   | Yes          | 29.82       | Mixed-breed             | NA                             | 3.5       | 2.0     | No                             | No                                   | NA          | NA                                | NA                                     | NA                                 | NA         | NA                      | NA                                      | NA                                                 | NA                                             | NA                     | Negative             | No                                         |
| 0457    | Yes      | Laboratory Workflow Deviation   | No           | No          | 11.83 | Female | Yes          | 28.55       | Purebred                | Labrador Retriever             | 3.5       | 2.0     | No                             | No                                   | NA          | NA                                | NA                                     | NA                                 | NA         | NA                      | NA                                      | NA                                                 | NA                                             | NA                     | Negative             | No                                         |
| 0458    | No       | NA                              | No           | Yes         | 1.50  | Male   | Yes          | 34.32       | Purebred                | Labrador Retriever             | 2.5       | 2.0     | No                             | No                                   | NA          | NA                                | NA                                     | NA                                 | NA         | NA                      | NA                                      | NA                                                 | NA                                             | NA                     | Negative             | No                                         |
| 0459    | No       | NA                              | No           | Yes         | 3.92  | Female | Yes          | 43.36       | Purebred                | German Shepherd                | 3.0       | 1.0     | No                             | No                                   | NA          | NA                                | NA                                     | NA                                 | NA         | NA                      | NA                                      | NA                                                 | NA                                             | NA                     | Negative             | No                                         |
| 0460    | No       | NA                              | Yes          | No          | 1.92  | Female | No           | 34.50       | Mixed-breed             | NA                             | 3.0       | 2.0     | No                             | No                                   | NA          | NA                                | NA                                     | NA                                 | NA         | NA                      | NA                                      | NA                                                 | NA                                             | NA                     | Negative             | No                                         |
| 0461    | No       | NA                              | Yes          | No          | 10.25 | Female | Yes          | 34.27       | Purebred                | Golden Retriever               | 2.0       | 1.0     | No                             | No                                   | NA          | NA                                | NA                                     | NA                                 | NA         | NA                      | NA                                      | NA                                                 | NA                                             | NA                     | Positive             | No                                         |
| 0462    | No       | NA                              | No           | Yes         | NA    | Male   | Yes          | 28.27       | Mixed-breed             | NA                             | 2.0       | 1.0     | No                             | No                                   | NA          | NA                                | NA                                     | NA                                 | NA         | NA                      | NA                                      | NA                                                 | NA                                             | NA                     | Negative             | No                                         |
| 0463    | No       | NA                              | No           | Yes         | 4.67  | Male   | Yes          | 26.15       | Mixed-breed             | NA                             | 1.0       | 1.0     | No                             | No                                   | NA          | NA                                | NA                                     | NA                                 | NA         | NA                      | NA                                      | NA                                                 | NA                                             | NA                     | Negative             | No                                         |
| 0464    | No       | NA                              | No           | Yes         | 6.00  | Female | Yes          | 21.64       | Mixed-breed             | NA                             | 1.5       | 1.0     | No                             | No                                   | NA          | NA                                | NA                                     | NA                                 | NA         | NA                      | NA                                      | NA                                                 | NA                                             | NA                     | Negative             | No                                         |
| 0465    | No       | NA                              | No           | Yes         | 3.00  | Female | Yes          | 19.64       | Mixed-breed             | NA                             | 1.5       | 2.0     | No                             | No                                   | NA          | NA                                | NA                                     | NA                                 | NA         | NA                      | NA                                      | NA                                                 | NA                                             | NA                     | Negative             | No                                         |
| 0466    | No       | NA                              | No           | Yes         | 4.50  | Male   | Yes          | 18.86       | Purebred                | Australian Shepherd            | 2.5       | 2.0     | No                             | No                                   | NA          | NA                                | NA                                     | NA                                 | NA         | NA                      | NA                                      | NA                                                 | NA                                             | NA                     | Negative             | No                                         |
| 0467    | No       | NA                              | No           | Yes         | 6.25  | Male   | Yes          | 24.36       | Mixed-breed             | NA                             | 2.0       | 1.0     | No                             | No                                   | NA          | NA                                | NA                                     | NA                                 | NA         | NA                      | NA                                      | NA                                                 | NA                                             | NA                     | Negative             | No                                         |
| 0468    | No       | NA                              | No           | Yes         | 1.50  | Male   | Yes          | 40.64       | Mixed-breed             | NA                             | 3.0       | 1.0     | No                             | No                                   | NA          | NA                                | NA                                     | NA                                 | NA         | NA                      | NA                                      | NA                                                 | NA                                             | NA                     | Negative             | No                                         |
| 0469    | No       | NA                              | No           | Yes         | 4.00  | Male   | Yes          | 32.73       | Mixed-breed             | NA                             | 2.0       | 1.0     | No                             | No                                   | NA          | NA                                | NA                                     | NA                                 | NA         | NA                      | NA                                      | NA                                                 | NA                                             | NA                     | Negative             | No                                         |
| 0470    | No       | NA                              | No           | Yes         | 4.08  | Male   | No           | 22.23       | Mixed-breed             | NA                             | 2.0       | 1.0     | No                             | No                                   | NA          | NA                                | NA                                     | NA                                 | NA         | NA                      | NA                                      | NA                                                 | NA                                             | NA                     | Negative             | No                                         |
| 0471    | No       | NA                              | No           | Yes         | 3.67  | Female | Yes          | 30.27       | Mixed-breed             | NA                             | 2.0       | 1.0     | No                             | No                                   | NA          | NA                                | NA                                     | NA                                 | NA         | NA                      | NA                                      | NA                                                 | NA                                             | NA                     | Negative             | No                                         |
| 0472    | No       | NA                              | No           | Yes         | 3.33  | Male   | Yes          | 44.36       | Purebred                | German Shepherd                | 3.5       | 2.0     | No                             | No                                   | NA          | NA                                | NA                                     | NA                                 | NA         | NA                      | NA                                      | NA                                                 | NA                                             | NA                     | Negative             | No                                         |
| 0473    | No       | NA                              | No           | Yes         | 5.08  | Male   | Yes          | 48.36       | Purebred                | Labrador Retriever             | 2.0       | 2.0     | No                             | No                                   | NA          | NA                                | NA                                     | NA                                 | NA         | NA                      | NA                                      | NA                                                 | NA                                             | NA                     | Negative             | No                                         |
| 0474    | No       | NA                              | No           | Yes         | 10.00 | Female | Yes          | 31.91       | Purebred                | American Staffordshire Terrier | 3.0       | 1.0     | No                             | No                                   | NA          | NA                                | NA                                     | NA                                 | NA         | NA                      | NA                                      | NA                                                 | NA                                             | NA                     | Negative             | No                                         |
| 0475    | No       | NA                              | Yes          | No          | 2.50  | Female | Yes          | 42.55       | Purebred                | Golden Retriever               | 3.0       | 2.0     | No                             | No                                   | NA          | NA                                | NA                                     | NA                                 | NA         | NA                      | NA                                      | NA                                                 | NA                                             | NA                     | Negative             | No                                         |
| 0476    | No       | NA                              | Yes          | No          | 7.92  | Male   | Yes          | 32.47       | Mixed-breed             | NA                             | 3.5       | 2.0     | No                             | No                                   | NA          | NA                                | NA                                     | NA                                 | NA         | NA                      | NA                                      | NA                                                 | NA                                             | NA                     | Negative             | No                                         |
| 0477    | No       | NA                              | No           | Yes         | 4.00  | Female | Yes          | 30.73       | Purebred                | Golden Retriever               | 2.0       | 2.0     | No                             | No                                   | NA          | NA                                | NA                                     | NA                                 | NA         | NA                      | NA                                      | NA                                                 | NA                                             | NA                     | Negative             | No                                         |
| 0478    | No       | NA                              | No           | Yes         | 3.42  | Male   | Yes          | 32.97       | Mixed-breed             | NA                             | 2.0       | 1.0     | No                             | No                                   | NA          | NA                                | NA                                     | NA                                 | NA         | NA                      | NA                                      | NA                                                 | NA                                             | NA                     | Negative             | No                                         |
| 0479    | No       | NA                              | No           | Yes         | 4.00  | Male   | Yes          | 29.00       | Purebred                | Golden Retriever               | 1.5       | 1.0     | No                             | No                                   | NA          | NA                                | NA                                     | NA                                 | NA         | NA                      | NA                                      | NA                                                 | NA                                             | NA                     | Negative             | No                                         |
| 0480    | No       | NA                              | Yes          | No          | 6.00  | Female | Yes          | 20.23       | Mixed-breed             | NA                             | 4.0       | 2.0     | No                             | No                                   | NA          | NA                                | NA                                     | NA                                 | NA         | NA                      | NA                                      | NA                                                 | NA                                             | NA                     | Negative             | No                                         |
| 0481    | No       | NA                              | No           | Yes         | 1.08  | Male   | Yes          | 21.54       | Mixed-breed             | NA                             | 2.0       | 1.0     | No                             | No                                   | NA          | NA                                | NA                                     | NA                                 | NA         | NA                      | NA                                      | NA                                                 | NA                                             | NA                     | Negative             | No                                         |
| 0482    | No       | NA                              | No           | Yes         | 9.00  | Female | Yes          | 7.72        | Mixed-breed             | NA                             | 3.5       | 1.5     | No                             | No                                   | NA          | NA                                | NA                                     | NA                                 | NA         | NA                      | NA                                      | NA                                                 | NA                                             | NA                     | Negative             | No                                         |
| 0483    | No       | NA                              | Yes          | No          | 6.50  | Male   | Yes          | 13.36       | Purebred                | Beagle                         | 1.0       | 0.5     | No                             | No                                   | NA          | NA                                | NA                                     | NA                                 | NA         | NA                      | NA                                      | NA                                                 | NA                                             | NA                     | Negative             | No                                         |
| 0484    | No       | NA                              | No           | Yes         | 5.75  | Male   | Yes          | 21.36       | Mixed-breed             | NA                             | 2.0       | 1.5     | No                             | No                                   | NA          | NA                                | NA                                     | NA                                 | NA         | NA                      | NA                                      | NA                                                 | NA                                             | NA                     | Negative             | No                                         |
| 0485    | No       | NA                              | No           | Yes         | 2.75  | Female | Yes          | 8.55        | Mixed-breed             | NA                             | 1.5       | 0.5     | No                             | No                                   | NA          | NA                                | NA                                     | NA                                 | NA         | NA                      | NA                                      | NA                                                 | NA                                             | NA                     | Negative             | No                                         |
| 0486    | No       | NA                              | No           | Yes         | 2.17  | Male   | Yes          | 29.55       | Mixed-breed             | NA                             | 1.0       | 0.0     | No                             | No                                   | NA          | NA                                | NA                                     | NA                                 | NA         | NA                      | NA                                      | NA                                                 | NA                                             | NA                     | Negative             | No                                         |
| 0487    | No       | NA                              | No           | Yes         | 1.25  | Male   | Yes          | 31.82       | Mixed-breed             | NA                             | 2.0       | 1.0     | No                             | No                                   | NA          | NA                                | NA                                     | NA                                 | NA         | NA                      | NA                                      | NA                                                 | NA                                             | NA                     | Negative             | No                                         |
| 0488    | No       | NA                              | Yes          | No          | 7.25  | Male   | Yes          | 23.23       | Purebred                | Poodle, Standard               | 4.0       | 2.0     | No                             | No                                   | NA          | NA                                | NA                                     | NA                                 | NA         | NA                      | NA                                      | NA                                                 | NA                                             | NA                     | Negative             | No                                         |
| 0489    | No       | NA                              | No           | Yes         | 5.25  | Male   | Yes          | 45.91       | Purebred                | Labrador Retriever             | 2.0       | 1.0     | No                             | No                                   | NA          | NA                                | NA                                     | NA                                 | NA         | NA                      | NA                                      | NA                                                 | NA                                             | NA                     | Negative             | No                                         |
| 0490    | No       | NA                              | No           | Yes         | 4.00  | Female | Yes          | 21.75       | Purebred                |                                |           |         |                                |                                      |             |                                   |                                        |                                    |            |                         |                                         |                                                    |                                                |                        |                      |                                            |

S1 Table. Full subject level data for subjects enrolled in the CANDiD study (continued)

See legend on last page.

| Subject | Excluded | Reason for Exclusion          | Training Set | Testing Set | Age   | Sex    | Spay/ Neuter | Weight (kg) | Purebred or Mixed Breed | Breed (Purebred)               | Hemolysis | Lipemia | Cancer Diagnosis at Enrollment | Cancer Diagnosed after Liquid Biopsy | Cancer Type | Immunophenotype (Lymphoid Cancer) | Extent of Disease: Non-Lymphoid Cancer | Extent of Disease: Lymphoid Cancer | Tumor Size | Cancer Type (Cancer #2) | Immunophenotype (Cancer #2 if Lymphoid) | Extent of Disease: Non-Lymphoid Cancer (Cancer #2) | Extent of Disease: Lymphoid Cancer (Cancer #2) | Tumor Size (Cancer #2) | Liquid Biopsy Result | CSO Prediction of Hematological Malignancy |
|---------|----------|-------------------------------|--------------|-------------|-------|--------|--------------|-------------|-------------------------|--------------------------------|-----------|---------|--------------------------------|--------------------------------------|-------------|-----------------------------------|----------------------------------------|------------------------------------|------------|-------------------------|-----------------------------------------|----------------------------------------------------|------------------------------------------------|------------------------|----------------------|--------------------------------------------|
| 0492    | No       | NA                            | No           | Yes         | 1.33  | Male   | Yes          | 25.14       | Purebred                | Labrador Retriever             | 3.0       | 2.0     | No                             | No                                   | NA          | NA                                | NA                                     | NA                                 | NA         | NA                      | NA                                      | NA                                                 | NA                                             | NA                     | Negative             | No                                         |
| 0493    | No       | NA                            | No           | Yes         | 1.17  | Male   | Yes          | 47.73       | Purebred                | Pyrenean Shepherd              | 1.0       | 1.0     | No                             | No                                   | NA          | NA                                | NA                                     | NA                                 | NA         | NA                      | NA                                      | NA                                                 | NA                                             | NA                     | Negative             | No                                         |
| 0494    | No       | NA                            | No           | Yes         | 9.58  | Female | Yes          | 14.23       | Mixed-breed             | NA                             | 2.5       | 2.0     | No                             | No                                   | NA          | NA                                | NA                                     | NA                                 | NA         | NA                      | NA                                      | NA                                                 | NA                                             | NA                     | Negative             | No                                         |
| 0495    | No       | NA                            | No           | Yes         | 3.25  | Female | Yes          | 18.82       | Mixed-breed             | NA                             | 1.0       | 1.0     | No                             | No                                   | NA          | NA                                | NA                                     | NA                                 | NA         | NA                      | NA                                      | NA                                                 | NA                                             | NA                     | Negative             | No                                         |
| 0496    | No       | NA                            | No           | Yes         | 1.00  | Male   | Yes          | 13.73       | Mixed-breed             | NA                             | 1.0       | 1.0     | No                             | No                                   | NA          | NA                                | NA                                     | NA                                 | NA         | NA                      | NA                                      | NA                                                 | NA                                             | NA                     | Negative             | No                                         |
| 0497    | No       | NA                            | No           | Yes         | 3.08  | Male   | No           | 41.59       | Purebred                | Labrador Retriever             | 2.0       | 1.0     | No                             | No                                   | NA          | NA                                | NA                                     | NA                                 | NA         | NA                      | NA                                      | NA                                                 | NA                                             | NA                     | Negative             | No                                         |
| 0498    | No       | NA                            | No           | Yes         | 3.08  | Female | Yes          | 17.27       | Purebred                | Australian Cattle Dog          | 2.5       | 1.0     | No                             | No                                   | NA          | NA                                | NA                                     | NA                                 | NA         | NA                      | NA                                      | NA                                                 | NA                                             | NA                     | Negative             | No                                         |
| 0499    | No       | NA                            | Yes          | No          | 7.33  | Male   | Yes          | 28.64       | Mixed-breed             | NA                             | 3.5       | 2.0     | No                             | No                                   | NA          | NA                                | NA                                     | NA                                 | NA         | NA                      | NA                                      | NA                                                 | NA                                             | NA                     | Positive             | No                                         |
| 0500    | No       | NA                            | No           | Yes         | 3.58  | Female | Yes          | 29.36       | Purebred                | Golden Retriever               | 3.0       | 2.0     | No                             | No                                   | NA          | NA                                | NA                                     | NA                                 | NA         | NA                      | NA                                      | NA                                                 | NA                                             | NA                     | Negative             | No                                         |
| 0501    | No       | NA                            | Yes          | No          | 2.67  | Female | Yes          | 34.73       | Purebred                | Golden Retriever               | 3.0       | 1.0     | No                             | No                                   | NA          | NA                                | NA                                     | NA                                 | NA         | NA                      | NA                                      | NA                                                 | NA                                             | NA                     | Negative             | No                                         |
| 0502    | No       | NA                            | No           | Yes         | 2.75  | Male   | Yes          | 38.91       | Purebred                | Golden Retriever               | 3.0       | 1.0     | No                             | No                                   | NA          | NA                                | NA                                     | NA                                 | NA         | NA                      | NA                                      | NA                                                 | NA                                             | NA                     | Negative             | No                                         |
| 0503    | No       | NA                            | Yes          | No          | 4.50  | Female | No           | 34.00       | Purebred                | Golden Retriever               | 4.0       | 1.0     | No                             | No                                   | NA          | NA                                | NA                                     | NA                                 | NA         | NA                      | NA                                      | NA                                                 | NA                                             | NA                     | Negative             | No                                         |
| 0504    | No       | NA                            | Yes          | No          | 4.75  | Female | Yes          | 31.59       | Mixed-breed             | NA                             | 3.0       | 1.0     | No                             | No                                   | NA          | NA                                | NA                                     | NA                                 | NA         | NA                      | NA                                      | NA                                                 | NA                                             | NA                     | Negative             | No                                         |
| 0505    | No       | NA                            | No           | Yes         | 10.75 | Male   | Yes          | 39.45       | Purebred                | Golden Retriever               | 3.0       | 2.0     | No                             | No                                   | NA          | NA                                | NA                                     | NA                                 | NA         | NA                      | NA                                      | NA                                                 | NA                                             | NA                     | Negative             | No                                         |
| 0506    | No       | NA                            | Yes          | No          | 3.42  | Female | Yes          | 24.05       | Mixed-breed             | NA                             | 3.5       | 1.5     | No                             | No                                   | NA          | NA                                | NA                                     | NA                                 | NA         | NA                      | NA                                      | NA                                                 | NA                                             | NA                     | Negative             | No                                         |
| 0507    | No       | NA                            | No           | Yes         | 2.83  | Female | No           | 24.55       | Purebred                | Golden Retriever               | 3.0       | 1.0     | No                             | No                                   | NA          | NA                                | NA                                     | NA                                 | NA         | NA                      | NA                                      | NA                                                 | NA                                             | NA                     | Negative             | No                                         |
| 0508    | No       | NA                            | No           | Yes         | 7.25  | Female | Yes          | 31.00       | Purebred                | Golden Retriever               | 4.0       | 1.0     | No                             | No                                   | NA          | NA                                | NA                                     | NA                                 | NA         | NA                      | NA                                      | NA                                                 | NA                                             | NA                     | Negative             | No                                         |
| 0509    | No       | NA                            | Yes          | No          | 6.17  | Female | Yes          | 20.36       | Purebred                | Golden Retriever               | 3.0       | 1.0     | No                             | No                                   | NA          | NA                                | NA                                     | NA                                 | NA         | NA                      | NA                                      | NA                                                 | NA                                             | NA                     | Negative             | No                                         |
| 0510    | No       | NA                            | No           | Yes         | 8.00  | Male   | Yes          | 39.86       | Mixed-breed             | NA                             | 1.5       | 1.0     | No                             | No                                   | NA          | NA                                | NA                                     | NA                                 | NA         | NA                      | NA                                      | NA                                                 | NA                                             | NA                     | Negative             | No                                         |
| 0511    | No       | NA                            | No           | Yes         | 2.92  | Female | No           | 42.00       | Purebred                | Rottweiler                     | 1.5       | NA      | No                             | No                                   | NA          | NA                                | NA                                     | NA                                 | NA         | NA                      | NA                                      | NA                                                 | NA                                             | NA                     | Negative             | No                                         |
| 0512    | No       | NA                            | Yes          | No          | 6.00  | Male   | No           | 31.82       | Purebred                | German Shepherd                | 2.0       | 1.0     | No                             | No                                   | NA          | NA                                | NA                                     | NA                                 | NA         | NA                      | NA                                      | NA                                                 | NA                                             | NA                     | Negative             | No                                         |
| 0513    | No       | NA                            | No           | Yes         | 6.42  | Female | No           | 27.86       | Purebred                | German Shepherd                | 1.5       | 1.0     | No                             | No                                   | NA          | NA                                | NA                                     | NA                                 | NA         | NA                      | NA                                      | NA                                                 | NA                                             | NA                     | Negative             | No                                         |
| 0514    | No       | NA                            | No           | Yes         | 5.00  | Male   | Yes          | 30.32       | Mixed-breed             | NA                             | 3.0       | 2.0     | No                             | No                                   | NA          | NA                                | NA                                     | NA                                 | NA         | NA                      | NA                                      | NA                                                 | NA                                             | NA                     | Negative             | No                                         |
| 0515    | No       | NA                            | Yes          | No          | 8.00  | Male   | Yes          | 61.36       | Mixed-breed             | NA                             | 1.0       | 1.0     | No                             | No                                   | NA          | NA                                | NA                                     | NA                                 | NA         | NA                      | NA                                      | NA                                                 | NA                                             | NA                     | Negative             | No                                         |
| 0516    | No       | NA                            | No           | Yes         | 2.00  | Male   | No           | 24.09       | Mixed-breed             | NA                             | 1.0       | 1.0     | No                             | No                                   | NA          | NA                                | NA                                     | NA                                 | NA         | NA                      | NA                                      | NA                                                 | NA                                             | NA                     | Negative             | No                                         |
| 0517    | No       | NA                            | No           | Yes         | 3.83  | Male   | Yes          | 22.41       | Mixed-breed             | NA                             | 3.0       | 2.0     | No                             | No                                   | NA          | NA                                | NA                                     | NA                                 | NA         | NA                      | NA                                      | NA                                                 | NA                                             | NA                     | Negative             | No                                         |
| 0518    | No       | NA                            | No           | Yes         | 1.00  | Male   | Yes          | 17.73       | Mixed-breed             | NA                             | 1.0       | 1.0     | No                             | No                                   | NA          | NA                                | NA                                     | NA                                 | NA         | NA                      | NA                                      | NA                                                 | NA                                             | NA                     | Negative             | No                                         |
| 0519    | No       | NA                            | Yes          | No          | 2.08  | Female | Yes          | 29.41       | Purebred                | Labrador Retriever             | 3.0       | 1.5     | No                             | No                                   | NA          | NA                                | NA                                     | NA                                 | NA         | NA                      | NA                                      | NA                                                 | NA                                             | NA                     | Negative             | No                                         |
| 0520    | No       | NA                            | No           | Yes         | 2.58  | Male   | No           | 21.82       | Purebred                | Australian Cattle Dog          | 3.5       | 2.0     | No                             | No                                   | NA          | NA                                | NA                                     | NA                                 | NA         | NA                      | NA                                      | NA                                                 | NA                                             | NA                     | Negative             | No                                         |
| 0521    | No       | NA                            | Yes          | No          | 10.00 | Male   | Yes          | 7.45        | Purebred                | Poodle, Miniature              | 4.0       | 2.0     | No                             | No                                   | NA          | NA                                | NA                                     | NA                                 | NA         | NA                      | NA                                      | NA                                                 | NA                                             | NA                     | Negative             | No                                         |
| 0522    | No       | NA                            | No           | Yes         | 4.17  | Male   | Yes          | 25.91       | Mixed-breed             | NA                             | 2.0       | 2.0     | No                             | No                                   | NA          | NA                                | NA                                     | NA                                 | NA         | NA                      | NA                                      | NA                                                 | NA                                             | NA                     | Negative             | No                                         |
| 0523    | No       | NA                            | Yes          | No          | 3.00  | Male   | No           | 40.82       | Purebred                | American Staffordshire Terrier | 3.0       | 2.0     | No                             | No                                   | NA          | NA                                | NA                                     | NA                                 | NA         | NA                      | NA                                      | NA                                                 | NA                                             | NA                     | Negative             | No                                         |
| 0524    | No       | NA                            | Yes          | No          | 2.00  | Male   | Yes          | 35.45       | Mixed-breed             | NA                             | 3.0       | 1.0     | No                             | No                                   | NA          | NA                                | NA                                     | NA                                 | NA         | NA                      | NA                                      | NA                                                 | NA                                             | NA                     | Negative             | No                                         |
| 0525    | No       | NA                            | No           | Yes         | 2.50  | Male   | Yes          | 27.05       | Mixed-breed             | NA                             | 4.0       | 1.0     | No                             | No                                   | NA          | NA                                | NA                                     | NA                                 | NA         | NA                      | NA                                      | NA                                                 | NA                                             | NA                     | Negative             | No                                         |
| 0526    | No       | NA                            | No           | Yes         | 6.08  | Female | Yes          | 49.55       | Purebred                | German Shepherd                | 3.0       | 2.0     | No                             | No                                   | NA          | NA                                | NA                                     | NA                                 | NA         | NA                      | NA                                      | NA                                                 | NA                                             | NA                     | Negative             | No                                         |
| 0527    | No       | NA                            | Yes          | No          | 10.00 | Male   | Yes          | 29.86       | Mixed-breed             | NA                             | 3.0       | 1.0     | No                             | No                                   | NA          | NA                                | NA                                     | NA                                 | NA         | NA                      | NA                                      | NA                                                 | NA                                             | NA                     | Negative             | No                                         |
| 0528    | Yes      | Laboratory Workflow Deviation | No           | No          | 5.42  | Male   | Yes          | 34.55       | Mixed-breed             | NA                             | 4.0       | 1.0     | No                             | No                                   | NA          | NA                                | NA                                     | NA                                 | NA         | NA                      | NA                                      | NA                                                 | NA                                             | NA                     | Negative             | No                                         |
| 0529    | No       | NA                            | No           | Yes         | 6.00  | Female | Yes          | 39.82       | Mixed-breed             | NA                             | 4.0       | 2.0     | No                             | No                                   | NA          | NA                                | NA                                     | NA                                 | NA         | NA                      | NA                                      | NA                                                 | NA                                             | NA                     | Negative             | No                                         |
| 0530    | No       | NA                            | No           | Yes         | 2.33  | Female | Yes          | 64.55       | Mixed-breed             | NA                             | 3.0       | 1.0     | No                             | No                                   | NA          | NA                                | NA                                     | NA                                 | NA         | NA                      | NA                                      | NA                                                 | NA                                             | NA                     | Negative             | No                                         |
| 0531    | No       | NA                            | No           | Yes         | 4.00  | Male   | Yes          | 38.27       | Mixed-breed             | NA                             | 4.0       | 2.0     | No                             | No                                   | NA          | NA                                | NA                                     | NA                                 | NA         | NA                      | NA                                      | NA                                                 | NA                                             | NA                     | Negative             | No                                         |
| 0532    | No       | NA                            | Yes          | No          | 2.25  | Male   | No           | 42.27       | Purebred                | German Shepherd                | 3.0       | 1.0     | No                             | No                                   | NA          | NA                                | NA                                     | NA                                 | NA         | NA                      | NA                                      | NA                                                 | NA                                             | NA                     | Negative             | No                                         |
| 0533    | Yes      | Test failure                  | No           | No          | 6.00  | Female | Yes          | 29.55       | Purebred                | Golden Retriever               | 3.0       | 1.0     | No                             | No                                   | NA          | NA                                | NA                                     | NA                                 | NA         | NA                      | NA                                      | NA                                                 | NA                                             | NA                     | Negative             | No                                         |
| 0534    | No       | NA                            | No           | Yes         | 8.08  | Male   | Yes          | 11.64       | Mixed-breed             | NA                             | 3.0       | 1.0     | No                             | No                                   | NA          | NA                                | NA                                     | NA                                 | NA         | NA                      | NA                                      | NA                                                 | NA                                             | NA                     | Negative             | No                                         |
| 0535    | No       | NA                            | No           | Yes         | 3.25  | Male   | Yes          | 35.45       | Mixed-breed             | NA                             | 4.0       | 2.0     | No                             | No                                   | NA          | NA                                | NA                                     | NA                                 | NA         | NA                      | NA                                      | NA                                                 | NA                                             | NA                     | Negative             | No                                         |
| 0536    | No       | NA                            | No           | Yes         | 2.83  | Female | No           | 13.68       | Mixed-breed             | NA                             | 3.5       | 2.0     | No                             | No                                   | NA          | NA                                | NA                                     | NA                                 | NA         | NA                      | NA                                      | NA                                                 | NA                                             | NA                     | Negative             | No                                         |
| 0537    | No       | NA                            | No           | Yes         | 2.33  | Female | Yes          | 31.59       | Purebred                | Golden Retriever               | 3.5       | 2.0     | No                             | No                                   | NA          | NA                                | NA                                     | NA                                 | NA         | NA                      | NA                                      | NA                                                 | NA                                             | NA                     | Negative             | No                                         |
| 0538    | No       | NA                            | No           | Yes         | 6.50  | Female | Yes          | 34.09       | Purebred                | Boxer                          | 3.0       | 1.0     | No                             | No                                   | NA          | NA                                | NA                                     | NA                                 | NA         | NA                      | NA                                      | NA                                                 | NA                                             | NA                     | Negative             | No                                         |
| 0539    | No       | NA                            | No           | Yes         | 4.50  | Male   | Yes          | 43.89       | Mixed-breed             | NA                             | 2.0       | 1.0     | No                             | No                                   | NA          | NA                                | NA                                     | NA                                 | NA         | NA                      | NA                                      | NA                                                 | NA                                             | NA                     | Negative             | No                                         |
| 0540    | No       | NA                            | No           | Yes         | 5.83  | Male   | Yes          | 37.68       | Purebred                | Golden Retriever               | 3.0       | 1.0     | No                             | No                                   | NA          | NA                                | NA                                     | NA                                 | NA         | NA                      | NA                                      | NA                                                 | NA                                             | NA                     | Negative             | No                                         |
| 0541    | No       | NA                            | No           | Yes         | 5.75  | Female | Yes          | 10.22       | Purebred                | Chihuahua                      | 3.5       | 2.0     | No                             | No                                   | NA          | NA                                | NA                                     | NA                                 | NA         | NA                      | NA                                      | NA                                                 | NA                                             | NA                     | Negative             | No                                         |
| 0542    | No       | NA                            | No           | Yes         | 1.25  | Female | Yes          | 19.32       | Mixed-breed             | NA                             | 4.0       | 2.0     | No                             | No                                   | NA          | NA                                | NA                                     | NA                                 | NA         | NA                      | NA                                      | NA                                                 | NA                                             | NA                     | Negative             | No                                         |
| 0543    | No       | NA                            | Yes          | No          | 7.17  | Female | Yes          | 17.84       | Purebred                | English Bulldog                | 4.0       | 2.0     | No                             | No                                   | NA          | NA                                | NA                                     | NA                                 | NA         | NA                      | NA                                      | NA                                                 | NA                                             | NA                     | Negative             | No                                         |
| 0544    | No       | NA                            | Yes          | No          | 4.25  | Female | Yes          | 33.86       | Mixed-breed             | NA                             | 4.0       | 2.0     | No                             | No                                   | NA          | NA                                | NA                                     | NA                                 | NA         | NA                      | NA                                      | NA                                                 | NA                                             | NA                     | Negative             | No                                         |
| 0545    | No       | NA                            | No           | Yes         | 1.08  | Male   | Yes          | 22.05       | Mixed-breed             | NA                             | 2.0       | 1.0     | No                             | No                                   | NA          | NA                                | NA                                     | NA                                 | NA         | NA                      | NA                                      | NA                                                 | NA                                             | NA                     | Negative             | No                                         |
| 0546    | No       | NA                            | No           | Yes         | 5.00  | Female | Yes          | 21.18       | Mixed-breed             | NA                             | 4.0       | 2.0     | No                             | No                                   | NA          | NA                                | NA                                     | NA                                 | NA         | NA                      | NA                                      | NA                                                 | NA                                             | NA                     | Negative             | No                                         |
| 0547    | No       | NA                            | No           | Yes         | 8.17  | Female | Yes          | 36.45       | Purebred                | Weimaraner                     | 1.0       | 1.0     | No                             | No                                   | NA          | NA                                | NA                                     | NA                                 | NA         | NA                      | NA                                      | NA                                                 | NA                                             | NA                     | Negative             | No                                         |
| 0548    | No       | NA                            | No           | Yes         | 8.92  | Female | Yes          | 31.95       | Purebred                | Labrador Retriever             | 4.0       | 1.0     | No                             | No                                   | NA          | NA                                | NA                                     | NA                                 | NA         | NA                      | NA                                      | NA                                                 | NA                                             | NA                     | Negative             | No                                         |
| 0549    | No       | NA                            | No           | Yes         | 14.75 | Male   | Yes          | 16.05       | Mixed-breed             | NA                             | 0.0       | 0.0     | No                             | No                                   | NA          | NA                                | NA                                     | NA                                 | NA         | NA                      | NA                                      | NA                                                 | NA                                             | NA                     | Negative             | No                                         |
| 0550    | No       | NA                            | No           | Yes         | 4.58  | Male   | No           | 41.18       | Purebred                | Rhodesian Ridgeback            | 3.5       | 2.0     | No                             | No                                   | NA          | NA                                | NA                                     | NA                                 | NA         | NA                      | NA                                      | NA                                                 | NA                                             | NA                     | Negative             | No                                         |
| 0551    | No       | NA                            | No           | Yes         | 5.00  | Female | Yes          | 27.50       | Purebred                | Border Collie                  | 3.0       | 2.0     | No                             | No                                   | NA          | NA                                | NA                                     | NA                                 | NA         | NA                      | NA                                      | NA                                                 | NA                                             | NA                     | Negative             | No                                         |
| 0552    | No       | NA                            | No           | Yes         | 2.92  | Male   | Yes          | 47.18       | Purebred                | Rottweiler                     | 1.5       | 1.0     | No                             | No                                   | NA          | NA                                | NA                                     | NA                                 | NA         | NA                      | NA                                      | NA                                                 | NA                                             | NA                     | Negative             | No                                         |
| 0553    | No       | NA                            | No           | Yes         | 2.50  | Female | No           | 37.64       | Purebred                | Labrador Retriever             | 0.5       | 1.0     | No                             | No                                   | NA          | NA                                | NA                                     | NA                                 | NA         | NA                      | NA                                      | NA                                                 | NA                                             | NA                     | Negative             | No                                         |
| 0554    | Yes      | Laboratory Workflow Deviation | No           | No          | 3.67  | Female | Yes          | 21.05       | Mixed-breed             | NA                             | 4.0       | 1.0     | No                             | No                                   | NA          | NA                                | NA                                     | NA                                 | NA         | NA                      | NA                                      | NA                                                 | NA                                             | NA                     | Negative             | No                                         |
| 0555    | No       | NA                            | No           | Yes         | 2.25  | Female | Yes          | 16.82       | Purebred                | English Springer Spaniel       | 3.0       | 1.0     | No                             | No                                   | NA          | NA                                | NA                                     | NA                                 | NA         | NA                      | NA                                      | NA                                                 | NA                                             | NA                     | Negative             | No                                         |
| 0556    | No       | NA                            | No           | Yes         | 2.33  | Male   | Yes          | 20.45       | Purebred                | Australian Shepherd            | 1.5       | 2.0     | No                             | No                                   | NA          | NA                                | NA                                     | NA                                 | NA         | NA                      | NA                                      | NA                                                 | NA                                             | NA                     | Negative             | No                                         |
| 0557    | No       | NA                            | No           | Yes         | 3.67  | Male   | Yes          | 30.64       | Mixed-breed             | NA                             | 4.0       | 2.0     | No                             | No                                   | NA          | NA                                | NA                                     | NA                                 | NA         | NA                      | NA                                      | NA                                                 | NA                                             | NA                     | Negative             | No                                         |
| 0558    | No       | NA                            | Yes          | No          | 6.83  | Male   | Yes          | 18.41       | Mixed-breed             | NA                             | 1.0       | 1.0     | No                             | No                                   | NA          | NA                                | NA                                     | NA                                 | NA         | NA                      | NA                                      | NA                                                 | NA                                             | NA                     | Negative             | No                                         |
| 0559    | No       | NA                            | No           | Yes         | 4.67  | Female | Yes          | 38.32       | Purebred                | German Wirehaired Pointer      |           |         |                                |                                      |             |                                   |                                        |                                    |            |                         |                                         |                                                    |                                                |                        |                      |                                            |



S1 Table. Full subject level data for subjects enrolled in the CANDiD study (continued)

| Subject | Excluded | Reason for Exclusion             | Training Set | Testing Set | Age   | Sex    | Spay/ Neuter | Weight (kg) | Purebred or Mixed Breed | Breed (Purebred)      | Hemolysis | Lipemia | Cancer Diagnosis at Enrollment | Cancer Diagnosed after Liquid Biopsy | Cancer Type | Immunophenotype (Lymphoid Cancer) | Extent of Disease: Non-Lymphoid Cancer | Extent of Disease: Lymphoid Cancer | Tumor Size | Cancer Type (Cancer #2) | Immunophenotype (Cancer #2 if Lymphoid) | Extent of Disease: Non-Lymphoid Cancer (Cancer #2) | Extent of Disease: Lymphoid Cancer (Cancer #2) | Tumor Size (Cancer #2) | Liquid Biopsy Result | CSO Prediction of Hematological Malignancy |
|---------|----------|----------------------------------|--------------|-------------|-------|--------|--------------|-------------|-------------------------|-----------------------|-----------|---------|--------------------------------|--------------------------------------|-------------|-----------------------------------|----------------------------------------|------------------------------------|------------|-------------------------|-----------------------------------------|----------------------------------------------------|------------------------------------------------|------------------------|----------------------|--------------------------------------------|
| 0629    | No       | NA                               | No           | Yes         | 10.00 | Male   | Yes          | 19.55       | Mixed-breed             | NA                    | 1.0       | 0.0     | No                             | No                                   | NA          | NA                                | NA                                     | NA                                 | NA         | NA                      | NA                                      | NA                                                 | NA                                             | NA                     | Negative             | No                                         |
| 0630    | No       | NA                               | No           | Yes         | 5.25  | Male   | Yes          | 19.50       | Mixed-breed             | NA                    | 3.0       | 0.0     | No                             | No                                   | NA          | NA                                | NA                                     | NA                                 | NA         | NA                      | NA                                      | NA                                                 | NA                                             | NA                     | Negative             | No                                         |
| 0631    | No       | NA                               | Yes          | No          | 6.42  | Male   | No           | 16.00       | Purebred                | Brittany              | 4.0       | 2.0     | No                             | No                                   | NA          | NA                                | NA                                     | NA                                 | NA         | NA                      | NA                                      | NA                                                 | NA                                             | NA                     | Negative             | No                                         |
| 0632    | Yes      | Laboratory Workflow Deviation    | No           | No          | 2.67  | Female | Yes          | 51.55       | Purebred                | Mastiff               | 4.0       | 1.0     | No                             | No                                   | NA          | NA                                | NA                                     | NA                                 | NA         | NA                      | NA                                      | NA                                                 | NA                                             | NA                     | Negative             | No                                         |
| 0633    | No       | NA                               | Yes          | No          | 10.33 | Male   | Yes          | 12.36       | Mixed-breed             | NA                    | 3.0       | 0.0     | No                             | No                                   | NA          | NA                                | NA                                     | NA                                 | NA         | NA                      | NA                                      | NA                                                 | NA                                             | NA                     | Negative             | No                                         |
| 0634    | No       | NA                               | No           | Yes         | 4.58  | Female | Yes          | 49.09       | Purebred                | German Shepherd       | 3.0       | 0.0     | No                             | No                                   | NA          | NA                                | NA                                     | NA                                 | NA         | NA                      | NA                                      | NA                                                 | NA                                             | NA                     | Negative             | No                                         |
| 0635    | No       | NA                               | No           | Yes         | 3.58  | Female | Yes          | 20.68       | Mixed-breed             | NA                    | 3.5       | 1.0     | No                             | No                                   | NA          | NA                                | NA                                     | NA                                 | NA         | NA                      | NA                                      | NA                                                 | NA                                             | NA                     | Negative             | No                                         |
| 0636    | No       | NA                               | Yes          | No          | 9.50  | Male   | Yes          | 35.77       | Purebred                | Labrador Retriever    | 3.0       | 2.0     | No                             | No                                   | NA          | NA                                | NA                                     | NA                                 | NA         | NA                      | NA                                      | NA                                                 | NA                                             | NA                     | Negative             | No                                         |
| 0637    | No       | NA                               | No           | Yes         | 10.00 | Male   | Yes          | 34.09       | Mixed-breed             | NA                    | 4.0       | 1.0     | No                             | No                                   | NA          | NA                                | NA                                     | NA                                 | NA         | NA                      | NA                                      | NA                                                 | NA                                             | NA                     | Negative             | No                                         |
| 0638    | Yes      | Laboratory Workflow Deviation    | No           | No          | 6.67  | Female | Yes          | 20.34       | Mixed-breed             | NA                    | 3.5       | 1.5     | No                             | No                                   | NA          | NA                                | NA                                     | NA                                 | NA         | NA                      | NA                                      | NA                                                 | NA                                             | NA                     | Negative             | No                                         |
| 0639    | No       | NA                               | No           | Yes         | 13.50 | Female | Yes          | 16.73       | Purebred                | Basenjis              | 3.0       | 0.0     | No                             | No                                   | NA          | NA                                | NA                                     | NA                                 | NA         | NA                      | NA                                      | NA                                                 | NA                                             | NA                     | Negative             | No                                         |
| 0640    | No       | NA                               | No           | Yes         | 3.83  | Female | Yes          | 29.26       | Mixed-breed             | NA                    | 2.0       | 0.0     | No                             | No                                   | NA          | NA                                | NA                                     | NA                                 | NA         | NA                      | NA                                      | NA                                                 | NA                                             | NA                     | Negative             | No                                         |
| 0641    | No       | NA                               | No           | Yes         | 1.50  | Male   | Yes          | 22.25       | Mixed-breed             | NA                    | 3.0       | 0.0     | No                             | No                                   | NA          | NA                                | NA                                     | NA                                 | NA         | NA                      | NA                                      | NA                                                 | NA                                             | NA                     | Negative             | No                                         |
| 0642    | No       | NA                               | Yes          | No          | 1.00  | Female | Yes          | 19.14       | Mixed-breed             | NA                    | 2.5       | 2.0     | No                             | No                                   | NA          | NA                                | NA                                     | NA                                 | NA         | NA                      | NA                                      | NA                                                 | NA                                             | NA                     | Negative             | No                                         |
| 0643    | No       | NA                               | Yes          | No          | 10.67 | Female | Yes          | 19.44       | Mixed-breed             | NA                    | 3.0       | 2.0     | No                             | No                                   | NA          | NA                                | NA                                     | NA                                 | NA         | NA                      | NA                                      | NA                                                 | NA                                             | NA                     | Negative             | No                                         |
| 0644    | No       | NA                               | No           | Yes         | 10.25 | Female | Yes          | 38.64       | Mixed-breed             | NA                    | 2.0       | 2.0     | No                             | No                                   | NA          | NA                                | NA                                     | NA                                 | NA         | NA                      | NA                                      | NA                                                 | NA                                             | NA                     | Negative             | No                                         |
| 0645    | No       | NA                               | No           | Yes         | 9.58  | Female | Yes          | 28.46       | Purebred                | Shetland Sheepdog     | 4.0       | 1.0     | No                             | No                                   | NA          | NA                                | NA                                     | NA                                 | NA         | NA                      | NA                                      | NA                                                 | NA                                             | NA                     | Negative             | No                                         |
| 0646    | No       | NA                               | No           | Yes         | 2.17  | Male   | No           | 25.55       | Mixed-breed             | NA                    | 2.0       | 1.0     | No                             | No                                   | NA          | NA                                | NA                                     | NA                                 | NA         | NA                      | NA                                      | NA                                                 | NA                                             | NA                     | Negative             | No                                         |
| 0647    | No       | NA                               | No           | Yes         | 5.83  | Female | Yes          | 39.28       | Mixed-breed             | NA                    | 4.0       | 2.0     | No                             | No                                   | NA          | NA                                | NA                                     | NA                                 | NA         | NA                      | NA                                      | NA                                                 | NA                                             | NA                     | Negative             | No                                         |
| 0648    | No       | NA                               | Yes          | No          | 4.25  | Male   | No           | 27.27       | Mixed-breed             | NA                    | 4.0       | 1.0     | No                             | No                                   | NA          | NA                                | NA                                     | NA                                 | NA         | NA                      | NA                                      | NA                                                 | NA                                             | NA                     | Negative             | No                                         |
| 0649    | No       | NA                               | No           | Yes         | 2.75  | Female | Yes          | 21.65       | Mixed-breed             | NA                    | 1.0       | 1.0     | No                             | No                                   | NA          | NA                                | NA                                     | NA                                 | NA         | NA                      | NA                                      | NA                                                 | NA                                             | NA                     | Negative             | No                                         |
| 0650    | No       | NA                               | No           | Yes         | 5.00  | Male   | Yes          | 26.25       | Mixed-breed             | NA                    | 3.5       | 2.0     | No                             | No                                   | NA          | NA                                | NA                                     | NA                                 | NA         | NA                      | NA                                      | NA                                                 | NA                                             | NA                     | Negative             | No                                         |
| 0651    | No       | NA                               | Yes          | No          | 6.50  | Female | Yes          | 35.57       | Purebred                | Akita                 | 3.0       | 2.0     | No                             | No                                   | NA          | NA                                | NA                                     | NA                                 | NA         | NA                      | NA                                      | NA                                                 | NA                                             | NA                     | Negative             | No                                         |
| 0652    | No       | NA                               | No           | Yes         | 1.42  | Male   | Yes          | 32.07       | Purebred                | Australian Shepherd   | 3.5       | 2.0     | No                             | No                                   | NA          | NA                                | NA                                     | NA                                 | NA         | NA                      | NA                                      | NA                                                 | NA                                             | NA                     | Negative             | No                                         |
| 0653    | No       | NA                               | Yes          | No          | 5.00  | Male   | Yes          | 11.32       | Mixed-breed             | NA                    | 4.0       | 1.0     | No                             | No                                   | NA          | NA                                | NA                                     | NA                                 | NA         | NA                      | NA                                      | NA                                                 | NA                                             | NA                     | Negative             | No                                         |
| 0654    | No       | NA                               | Yes          | No          | 4.50  | Male   | Yes          | 30.45       | Mixed-breed             | NA                    | 1.5       | 0.0     | No                             | No                                   | NA          | NA                                | NA                                     | NA                                 | NA         | NA                      | NA                                      | NA                                                 | NA                                             | NA                     | Negative             | No                                         |
| 0655    | No       | NA                               | Yes          | No          | 3.33  | Female | No           | 28.96       | Mixed-breed             | NA                    | 3.5       | 2.0     | No                             | No                                   | NA          | NA                                | NA                                     | NA                                 | NA         | NA                      | NA                                      | NA                                                 | NA                                             | NA                     | Negative             | No                                         |
| 0656    | Yes      | Test failure                     | No           | No          | 2.75  | Female | Yes          | 22.25       | Mixed-breed             | NA                    | 4.0       | 2.0     | No                             | No                                   | NA          | NA                                | NA                                     | NA                                 | NA         | NA                      | NA                                      | NA                                                 | NA                                             | NA                     | Negative             | No                                         |
| 0657    | No       | NA                               | No           | Yes         | 2.25  | Male   | Yes          | 42.59       | Purebred                | Golden Retriever      | 2.0       | 1.0     | No                             | No                                   | NA          | NA                                | NA                                     | NA                                 | NA         | NA                      | NA                                      | NA                                                 | NA                                             | NA                     | Negative             | No                                         |
| 0658    | No       | NA                               | No           | Yes         | 6.67  | Male   | Yes          | 11.32       | Purebred                | Dachshund             | 4.0       | 2.0     | No                             | No                                   | NA          | NA                                | NA                                     | NA                                 | NA         | NA                      | NA                                      | NA                                                 | NA                                             | NA                     | Negative             | No                                         |
| 0659    | No       | NA                               | No           | Yes         | 1.00  | Male   | No           | 12.83       | Mixed-breed             | NA                    | 3.0       | 0.0     | No                             | No                                   | NA          | NA                                | NA                                     | NA                                 | NA         | NA                      | NA                                      | NA                                                 | NA                                             | NA                     | Negative             | No                                         |
| 0660    | No       | NA                               | No           | Yes         | 4.17  | Male   | No           | 32.47       | Purebred                | Dogues de Bordeaux    | 3.0       | 0.0     | No                             | No                                   | NA          | NA                                | NA                                     | NA                                 | NA         | NA                      | NA                                      | NA                                                 | NA                                             | NA                     | Negative             | No                                         |
| 0661    | No       | NA                               | No           | Yes         | 4.00  | Male   | Yes          | 47.30       | Purebred                | German Shepherd       | 4.0       | 2.0     | No                             | No                                   | NA          | NA                                | NA                                     | NA                                 | NA         | NA                      | NA                                      | NA                                                 | NA                                             | NA                     | Negative             | No                                         |
| 0662    | No       | NA                               | No           | Yes         | 1.58  | Male   | Yes          | 36.28       | Purebred                | Boxer                 | 3.0       | 1.0     | No                             | No                                   | NA          | NA                                | NA                                     | NA                                 | NA         | NA                      | NA                                      | NA                                                 | NA                                             | NA                     | Negative             | No                                         |
| 0663    | No       | NA                               | No           | Yes         | 3.42  | Male   | No           | 29.06       | Mixed-breed             | NA                    | 4.0       | 2.0     | No                             | No                                   | NA          | NA                                | NA                                     | NA                                 | NA         | NA                      | NA                                      | NA                                                 | NA                                             | NA                     | Negative             | No                                         |
| 0664    | No       | NA                               | No           | Yes         | 4.00  | Male   | Yes          | 55.12       | Purebred                | Great Dane            | 4.0       | 2.0     | No                             | No                                   | NA          | NA                                | NA                                     | NA                                 | NA         | NA                      | NA                                      | NA                                                 | NA                                             | NA                     | Negative             | No                                         |
| 0665    | No       | NA                               | No           | Yes         | 8.00  | Male   | Yes          | 11.22       | Mixed-breed             | NA                    | 2.0       | 1.0     | No                             | No                                   | NA          | NA                                | NA                                     | NA                                 | NA         | NA                      | NA                                      | NA                                                 | NA                                             | NA                     | Negative             | No                                         |
| 0666    | No       | NA                               | No           | Yes         | 3.33  | Male   | Yes          | 39.48       | Mixed-breed             | NA                    | 3.0       | 2.0     | No                             | No                                   | NA          | NA                                | NA                                     | NA                                 | NA         | NA                      | NA                                      | NA                                                 | NA                                             | NA                     | Negative             | No                                         |
| 0667    | No       | NA                               | No           | Yes         | 3.17  | Female | Yes          | 30.56       | Mixed-breed             | NA                    | 3.0       | 2.0     | No                             | No                                   | NA          | NA                                | NA                                     | NA                                 | NA         | NA                      | NA                                      | NA                                                 | NA                                             | NA                     | Negative             | No                                         |
| 0668    | No       | NA                               | No           | Yes         | 1.17  | Male   | No           | 25.95       | Mixed-breed             | NA                    | 4.0       | 2.0     | No                             | No                                   | NA          | NA                                | NA                                     | NA                                 | NA         | NA                      | NA                                      | NA                                                 | NA                                             | NA                     | Negative             | No                                         |
| 0669    | No       | NA                               | Yes          | No          | 7.00  | Female | Yes          | 21.45       | Mixed-breed             | NA                    | 4.0       | 1.5     | No                             | No                                   | NA          | NA                                | NA                                     | NA                                 | NA         | NA                      | NA                                      | NA                                                 | NA                                             | NA                     | Negative             | No                                         |
| 0670    | No       | NA                               | No           | Yes         | 1.17  | Female | Yes          | 39.98       | Purebred                | Bernese Mountain Dogs | 3.0       | 1.0     | No                             | No                                   | NA          | NA                                | NA                                     | NA                                 | NA         | NA                      | NA                                      | NA                                                 | NA                                             | NA                     | Negative             | No                                         |
| 0671    | No       | NA                               | No           | Yes         | 4.00  | Female | Yes          | 25.45       | Purebred                | German Shepherd       | 3.0       | 1.5     | No                             | No                                   | NA          | NA                                | NA                                     | NA                                 | NA         | NA                      | NA                                      | NA                                                 | NA                                             | NA                     | Negative             | No                                         |
| 0672    | No       | NA                               | No           | Yes         | 2.00  | Male   | Yes          | 28.64       | Mixed-breed             | NA                    | 2.0       | 0.0     | No                             | No                                   | NA          | NA                                | NA                                     | NA                                 | NA         | NA                      | NA                                      | NA                                                 | NA                                             | NA                     | Negative             | No                                         |
| 0673    | No       | NA                               | No           | Yes         | 3.17  | Female | Yes          | 31.06       | Purebred                | German Shepherd       | 3.0       | 2.0     | No                             | No                                   | NA          | NA                                | NA                                     | NA                                 | NA         | NA                      | NA                                      | NA                                                 | NA                                             | NA                     | Negative             | No                                         |
| 0674    | Yes      | Laboratory Workflow Deviation    | No           | No          | 1.17  | Male   | No           | 29.76       | Purebred                | Doberman Pinscher     | 4.0       | 2.0     | No                             | No                                   | NA          | NA                                | NA                                     | NA                                 | NA         | NA                      | NA                                      | NA                                                 | NA                                             | NA                     | Negative             | No                                         |
| 0675    | No       | NA                               | No           | Yes         | 1.50  | Male   | No           | 25.05       | Mixed-breed             | NA                    | 4.0       | 1.0     | No                             | No                                   | NA          | NA                                | NA                                     | NA                                 | NA         | NA                      | NA                                      | NA                                                 | NA                                             | NA                     | Negative             | No                                         |
| 0676    | Yes      | Laboratory Workflow Deviation    | No           | No          | 6.17  | Female | Yes          | 27.96       | Mixed-breed             | NA                    | 4.0       | 2.0     | No                             | No                                   | NA          | NA                                | NA                                     | NA                                 | NA         | NA                      | NA                                      | NA                                                 | NA                                             | NA                     | Negative             | No                                         |
| 0677    | No       | NA                               | Yes          | No          | 3.58  | Male   | Yes          | 30.06       | Mixed-breed             | NA                    | 4.0       | 2.0     | No                             | No                                   | NA          | NA                                | NA                                     | NA                                 | NA         | NA                      | NA                                      | NA                                                 | NA                                             | NA                     | Negative             | No                                         |
| 0678    | No       | NA                               | Yes          | No          | 2.08  | Female | No           | 32.37       | Purebred                | German Shepherd       | 4.0       | 2.0     | No                             | No                                   | NA          | NA                                | NA                                     | NA                                 | NA         | NA                      | NA                                      | NA                                                 | NA                                             | NA                     | Negative             | No                                         |
| 0679    | Yes      | Enrollment or Clinical Deviation | No           | No          | 4.67  | Female | Yes          | 39.18       | Purebred                | Bernese Mountain Dogs | 4.0       | 2.0     | No                             | No                                   | NA          | NA                                | NA                                     | NA                                 | NA         | NA                      | NA                                      | NA                                                 | NA                                             | NA                     | Negative             | No                                         |
| 0680    | No       | NA                               | Yes          | No          | 10.42 | Male   | Yes          | 66.84       | Purebred                | Akita                 | 4.0       | 2.0     | No                             | No                                   | NA          | NA                                | NA                                     | NA                                 | NA         | NA                      | NA                                      | NA                                                 | NA                                             | NA                     | Negative             | No                                         |
| 0681    | No       | NA                               | No           | Yes         | 3.17  | Female | Yes          | 26.56       | Mixed-breed             | NA                    | 2.0       | 1.0     | No                             | No                                   | NA          | NA                                | NA                                     | NA                                 | NA         | NA                      | NA                                      | NA                                                 | NA                                             | NA                     | Negative             | No                                         |
| 0682    | No       | NA                               | No           | Yes         | 1.00  | Male   | Yes          | 38.28       | Purebred                | Golden Retriever      | 4.0       | 2.0     | No                             | No                                   | NA          | NA                                | NA                                     | NA                                 | NA         | NA                      | NA                                      | NA                                                 | NA                                             | NA                     | Negative             | No                                         |
| 0683    | No       | NA                               | Yes          | No          | 1.25  | Male   | Yes          | 30.96       | Purebred                | Labrador Retriever    | 3.0       | 1.0     | No                             | No                                   | NA          | NA                                | NA                                     | NA                                 | NA         | NA                      | NA                                      | NA                                                 | NA                                             | NA                     | Negative             | No                                         |
| 0684    | No       | NA                               | Yes          | No          | 4.17  | Male   | Yes          | 36.48       | Purebred                | Samoyed               | 4.0       | NA      | No                             | No                                   | NA          | NA                                | NA                                     | NA                                 | NA         | NA                      | NA                                      | NA                                                 | NA                                             | NA                     | Negative             | No                                         |
| 0685    | No       | NA                               | No           | Yes         | 2.00  | Male   | Yes          | 33.57       | Mixed-breed             | NA                    | 3.5       | 1.0     | No                             | No                                   | NA          | NA                                | NA                                     | NA                                 | NA         | NA                      | NA                                      | NA                                                 | NA                                             | NA                     | Negative             | No                                         |
| 0686    | Yes      | Laboratory Workflow Deviation    | No           | No          | 3.00  | Male   | Yes          | 29.16       | Mixed-breed             | NA                    | 4.0       | 2.0     | No                             | No                                   | NA          | NA                                | NA                                     | NA                                 | NA         | NA                      | NA                                      | NA                                                 | NA                                             | NA                     | Negative             | No                                         |
| 0687    | Yes      | Laboratory Workflow Deviation    | No           | No          | 1.33  | Female | No           | 26.05       | Purebred                | Labrador Retriever    | 4.0       | 2.0     | No                             | No                                   | NA          | NA                                | NA                                     | NA                                 | NA         | NA                      | NA                                      | NA                                                 | NA                                             | NA                     | Positive             | No                                         |
| 0688    | No       | NA                               | No           | Yes         | 2.25  | Female | Yes          | 34.67       | Mixed-breed             | NA                    | 3.0       | 1.0     | No                             | No                                   | NA          | NA                                | NA                                     | NA                                 | NA         | NA                      | NA                                      | NA                                                 | NA                                             | NA                     | Negative             | No                                         |
| 0689    | No       | NA                               | No           | Yes         | 2.33  | Female | Yes          | 35.67       | Mixed-breed             | NA                    | 4.0       | 2.0     | No                             | No                                   | NA          | NA                                | NA                                     | NA                                 | NA         | NA                      | NA                                      | NA                                                 | NA                                             | NA                     | Negative             | No                                         |
| 0690    | No       | NA                               | No           | Yes         | 2.00  | Female | Yes          | 16.73       | Mixed-breed             | NA                    | 3.0       | 2.0     | No                             | No                                   | NA          | NA                                | NA                                     | NA                                 | NA         | NA                      | NA                                      | NA                                                 | NA                                             | NA                     | Negative             | No                                         |
| 0691    | No       | NA                               | No           | Yes         | 12.00 | Male   | Yes          | 29.32       | Mixed-breed             | NA                    | 2.0       | 1.0     | No                             | No                                   | NA          | NA                                | NA                                     | NA                                 | NA         | NA                      | NA                                      | NA                                                 | NA                                             | NA                     | Negative             | No                                         |
| 0692    | No       | NA                               | Yes          | No          | 5.33  | Female | Yes          | 28.09       | Purebred                | Golden Retriever      | 4.0       | 2.0     | No                             | No                                   | NA          | NA                                | NA                                     | NA                                 | NA         | NA                      | NA                                      | NA                                                 | NA                                             | NA                     | Negative             | No                                         |
| 0693    | Yes      | Laboratory Workflow Deviation    | No           | No          | NA    | NA     | NA           | NA          | NA                      | NA                    | 4.0       | 2.0     | No                             | No                                   | NA          | NA                                | NA                                     | NA                                 | NA         | NA                      | NA                                      | NA                                                 | NA                                             | NA                     | Negative             | No                                         |
| 0694    | No       | NA                               | No           | Yes         | 6.00  | Male   | Yes          | 22.05       | Purebred                | Siberian Husky        | 3.5       | 2.0     | No                             | No                                   | NA          | NA                                | NA                                     | NA                                 | NA         | NA                      | NA                                      | NA                                                 | NA                                             | NA                     | Negative             | No                                         |
| 0695    | No       | NA                               | No           | Yes         | 7.00  | Female | Yes          | 35.07       | Purebred                | Alaskan Malamute      | 3.0       | 2.0     | No                             | No                                   | NA          | NA                                | NA                                     | NA                                 | NA         | NA                      | NA                                      | NA                                                 | NA                                             | NA                     | Negative             | No                                         |
| 0696    | No       | NA                               | No           | Yes         | 1.00  | Male   | Yes          | 27.06       | Purebred                | Golden Retriever      |           |         |                                |                                      |             |                                   |                                        |                                    |            |                         |                                         |                                                    |                                                |                        |                      |                                            |



S1 Table. Full subject level data for subjects enrolled in the CANDiD study (continued)

See legend on last page.

| Subject | Excluded | Reason for Exclusion             | Training Set | Testing Set | Age   | Sex    | Spay/ Neuter | Weight (kg) | Purebred or Mixed Breed | Breed (Purebred)      | Hemolysis | Lipemia | Cancer Diagnosis at Enrollment | Cancer Diagnosed after Liquid Biopsy | Cancer Type                          | Immunophenotype (Lymphoid Cancer) | Extent of Disease: Non-Lymphoid Cancer | Extent of Disease: Lymphoid Cancer | Tumor Size | Cancer Type (Cancer #2) | Immunophenotype (Cancer #2 if Lymphoid) | Extent of Disease: Non-Lymphoid Cancer (Cancer #2) | Extent of Disease: Lymphoid Cancer (Cancer #2) | Tumor Size (Cancer #2) | Liquid Biopsy Result | CSO Prediction of Hematological Malignancy |
|---------|----------|----------------------------------|--------------|-------------|-------|--------|--------------|-------------|-------------------------|-----------------------|-----------|---------|--------------------------------|--------------------------------------|--------------------------------------|-----------------------------------|----------------------------------------|------------------------------------|------------|-------------------------|-----------------------------------------|----------------------------------------------------|------------------------------------------------|------------------------|----------------------|--------------------------------------------|
| 0761    | Yes      | Laboratory Workflow Deviation    | No           | No          | NA    | NA     | NA           | NA          | NA                      | NA                    | 2.0       | 1.0     | No                             | No                                   | NA                                   | NA                                | NA                                     | NA                                 | NA         | NA                      | NA                                      | NA                                                 | NA                                             | NA                     | Negative             | No                                         |
| 0762    | No       | NA                               | No           | Yes         | 2.83  | Male   | No           | 44.86       | Purebred                | Labrador Retriever    | 3.5       | 1.0     | No                             | No                                   | NA                                   | NA                                | NA                                     | NA                                 | NA         | NA                      | NA                                      | NA                                                 | NA                                             | NA                     | Negative             | No                                         |
| 0763    | No       | NA                               | No           | Yes         | 6.92  | Male   | Yes          | 30.86       | Mixed-breed             | NA                    | 2.5       | 1.0     | No                             | No                                   | NA                                   | NA                                | NA                                     | NA                                 | NA         | NA                      | NA                                      | NA                                                 | NA                                             | NA                     | Negative             | No                                         |
| 0764    | No       | NA                               | No           | Yes         | 1.33  | Male   | No           | 35.67       | Purebred                | Golden Retriever      | 3.0       | 2.0     | No                             | No                                   | NA                                   | NA                                | NA                                     | NA                                 | NA         | NA                      | NA                                      | NA                                                 | NA                                             | NA                     | Negative             | No                                         |
| 0765    | No       | NA                               | No           | Yes         | 1.75  | Female | Yes          | 27.66       | Mixed-breed             | NA                    | 4.0       | 1.0     | No                             | No                                   | NA                                   | NA                                | NA                                     | NA                                 | NA         | NA                      | NA                                      | NA                                                 | NA                                             | NA                     | Negative             | No                                         |
| 0766    | Yes      | Laboratory Workflow Deviation    | No           | No          | NA    | NA     | NA           | NA          | NA                      | NA                    | 3.0       | 2.0     | No                             | No                                   | NA                                   | NA                                | NA                                     | NA                                 | NA         | NA                      | NA                                      | NA                                                 | NA                                             | NA                     | Negative             | No                                         |
| 0767    | No       | NA                               | No           | Yes         | 1.67  | Female | Yes          | 11.36       | Purebred                | French Bulldog        | 4.0       | 1.0     | No                             | No                                   | NA                                   | NA                                | NA                                     | NA                                 | NA         | NA                      | NA                                      | NA                                                 | NA                                             | NA                     | Negative             | No                                         |
| 0768    | No       | NA                               | No           | Yes         | 4.33  | Male   | No           | 13.13       | Mixed-breed             | NA                    | 2.5       | 1.0     | No                             | No                                   | NA                                   | NA                                | NA                                     | NA                                 | NA         | NA                      | NA                                      | NA                                                 | NA                                             | NA                     | Negative             | No                                         |
| 0769    | No       | NA                               | No           | Yes         | 1.25  | Male   | Yes          | 30.46       | Purebred                | German Shepherd       | 2.0       | 0.0     | No                             | No                                   | NA                                   | NA                                | NA                                     | NA                                 | NA         | NA                      | NA                                      | NA                                                 | NA                                             | NA                     | Negative             | No                                         |
| 0770    | No       | NA                               | No           | Yes         | 3.00  | Male   | Yes          | 44.99       | Purebred                | German Shepherd       | 3.5       | 1.0     | No                             | No                                   | NA                                   | NA                                | NA                                     | NA                                 | NA         | NA                      | NA                                      | NA                                                 | NA                                             | NA                     | Negative             | No                                         |
| 0771    | No       | NA                               | No           | Yes         | 2.50  | Female | Yes          | 44.19       | Purebred                | Australian Shepherd   | 4.0       | NA      | No                             | No                                   | NA                                   | NA                                | NA                                     | NA                                 | NA         | NA                      | NA                                      | NA                                                 | NA                                             | NA                     | Negative             | No                                         |
| 0772    | No       | NA                               | No           | Yes         | 2.17  | Female | Yes          | 23.45       | Purebred                | Australian Shepherd   | 2.0       | 1.0     | No                             | No                                   | NA                                   | NA                                | NA                                     | NA                                 | NA         | NA                      | NA                                      | NA                                                 | NA                                             | NA                     | Negative             | No                                         |
| 0773    | No       | NA                               | No           | Yes         | 3.08  | Male   | Yes          | 15.23       | Mixed-breed             | NA                    | 2.0       | 1.0     | No                             | No                                   | NA                                   | NA                                | NA                                     | NA                                 | NA         | NA                      | NA                                      | NA                                                 | NA                                             | NA                     | Negative             | No                                         |
| 0774    | No       | NA                               | No           | Yes         | 2.92  | Female | Yes          | 41.89       | Mixed-breed             | NA                    | 3.0       | 1.0     | No                             | No                                   | NA                                   | NA                                | NA                                     | NA                                 | NA         | NA                      | NA                                      | NA                                                 | NA                                             | NA                     | Negative             | No                                         |
| 0775    | No       | NA                               | No           | Yes         | 2.67  | Male   | Yes          | 24.55       | Mixed-breed             | NA                    | 4.0       | 1.0     | No                             | No                                   | NA                                   | NA                                | NA                                     | NA                                 | NA         | NA                      | NA                                      | NA                                                 | NA                                             | NA                     | Negative             | No                                         |
| 0776    | Yes      | Laboratory Workflow Deviation    | No           | No          | NA    | NA     | NA           | NA          | NA                      | NA                    | 2.5       | 1.0     | No                             | No                                   | NA                                   | NA                                | NA                                     | NA                                 | NA         | NA                      | NA                                      | NA                                                 | NA                                             | NA                     | Negative             | No                                         |
| 0777    | No       | NA                               | No           | Yes         | 2.92  | Male   | No           | 39.14       | Purebred                | Labrador Retriever    | 4.0       | 2.0     | No                             | No                                   | NA                                   | NA                                | NA                                     | NA                                 | NA         | NA                      | NA                                      | NA                                                 | NA                                             | NA                     | Negative             | No                                         |
| 0778    | Yes      | Laboratory Workflow Deviation    | No           | No          | 7.58  | Male   | Yes          | 20.45       | Mixed-breed             | NA                    | 4.0       | 2.0     | No                             | No                                   | NA                                   | NA                                | NA                                     | NA                                 | NA         | NA                      | NA                                      | NA                                                 | NA                                             | NA                     | Negative             | No                                         |
| 0779    | No       | NA                               | No           | Yes         | 5.42  | Female | Yes          | 31.67       | Mixed-breed             | NA                    | 4.0       | 2.0     | No                             | No                                   | NA                                   | NA                                | NA                                     | NA                                 | NA         | NA                      | NA                                      | NA                                                 | NA                                             | NA                     | Indeterminate        | No                                         |
| 0780    | No       | NA                               | No           | Yes         | 2.50  | Female | No           | 25.05       | Purebred                | Labrador Retriever    | 4.0       | 1.0     | No                             | No                                   | NA                                   | NA                                | NA                                     | NA                                 | NA         | NA                      | NA                                      | NA                                                 | NA                                             | NA                     | Negative             | No                                         |
| 0781    | Yes      | Laboratory Workflow Deviation    | No           | No          | NA    | NA     | NA           | NA          | NA                      | NA                    | 2.0       | 1.0     | No                             | No                                   | NA                                   | NA                                | NA                                     | NA                                 | NA         | NA                      | NA                                      | NA                                                 | NA                                             | NA                     | Negative             | No                                         |
| 0782    | No       | NA                               | No           | Yes         | 3.92  | Female | Yes          | 30.26       | Mixed-breed             | NA                    | 3.5       | 2.0     | No                             | No                                   | NA                                   | NA                                | NA                                     | NA                                 | NA         | NA                      | NA                                      | NA                                                 | NA                                             | NA                     | Negative             | No                                         |
| 0783    | No       | NA                               | No           | Yes         | 2.25  | Male   | Yes          | 13.63       | Purebred                | Boston Terrier        | 3.0       | 2.0     | No                             | No                                   | NA                                   | NA                                | NA                                     | NA                                 | NA         | NA                      | NA                                      | NA                                                 | NA                                             | NA                     | Negative             | No                                         |
| 0784    | No       | NA                               | No           | Yes         | 8.75  | Female | Yes          | 40.99       | Purebred                | Doberman Pinscher     | 2.5       | NA      | Yes                            | No                                   | Bone, Osteosarcoma                   | NA                                | Localized/Regional                     | NA                                 | UNK        | NA                      | NA                                      | NA                                                 | NA                                             | NA                     | Negative             | No                                         |
| 0785    | No       | NA                               | No           | Yes         | 11.75 | Female | Yes          | 29.16       | Mixed-breed             | NA                    | 2.0       | NA      | Yes                            | No                                   | Abdominal Cavity                     | NA                                | Localized/Regional                     | NA                                 | <=5cm      | NA                      | NA                                      | NA                                                 | NA                                             | NA                     | Positive             | No                                         |
| 0786    | No       | NA                               | No           | Yes         | 9.25  | Male   | Yes          | 53.81       | Mixed-breed             | NA                    | 3.0       | NA      | Yes                            | No                                   | Oral Cavity                          | NA                                | Localized/Regional                     | NA                                 | <=5cm      | NA                      | NA                                      | NA                                                 | NA                                             | NA                     | Positive             | No                                         |
| 0787    | Yes      | Enrollment or Clinical Deviation | No           | No          | 3.42  | Female | Yes          | 26.66       | Mixed-breed             | NA                    | 2.0       | NA      | Yes                            | No                                   | NA                                   | NA                                | NA                                     | NA                                 | NA         | NA                      | NA                                      | NA                                                 | NA                                             | NA                     | Positive             | No                                         |
| 0788    | Yes      | Enrollment or Clinical Deviation | No           | No          | 7.58  | Female | Yes          | 48.10       | Purebred                | Doberman Pinscher     | 1.0       | NA      | Yes                            | No                                   | NA                                   | NA                                | NA                                     | NA                                 | NA         | NA                      | NA                                      | NA                                                 | NA                                             | NA                     | Negative             | No                                         |
| 0789    | No       | NA                               | No           | Yes         | 9.75  | Male   | Yes          | 27.76       | Purebred                | Golden Retriever      | 2.0       | NA      | Yes                            | No                                   | Hemangiosarcoma                      | NA                                | Disseminated/Metastatic                | NA                                 | <=5cm      | NA                      | NA                                      | NA                                                 | NA                                             | NA                     | Positive             | No                                         |
| 0790    | No       | NA                               | No           | Yes         | 13.33 | Male   | Yes          | 38.68       | Mixed-breed             | NA                    | 1.0       | NA      | Yes                            | No                                   | Soft Tissue Sarcoma                  | NA                                | Localized/Regional                     | NA                                 | <=5cm      | NA                      | NA                                      | NA                                                 | NA                                             | NA                     | Negative             | No                                         |
| 0791    | No       | NA                               | Yes          | No          | 5.83  | Male   | Yes          | 80.37       | Purebred                | St. Bernard           | 0.0       | NA      | Yes                            | No                                   | Bone, Osteosarcoma                   | NA                                | Localized/Regional                     | NA                                 | >5cm       | NA                      | NA                                      | NA                                                 | NA                                             | NA                     | Positive             | No                                         |
| 0792    | No       | NA                               | No           | Yes         | 6.42  | Female | Yes          | 45.09       | Mixed-breed             | NA                    | 1.0       | 2.0     | Yes                            | No                                   | Lymphoma, Intermediate to Large Cell | B-cell                            | NA                                     | Disseminated/ Metastatic           | <=5cm      | NA                      | NA                                      | NA                                                 | NA                                             | NA                     | Positive             | Yes                                        |
| 0793    | No       | NA                               | No           | Yes         | 10.08 | Male   | No           | 33.07       | Purebred                | Golden Retriever      | 1.0       | 2.0     | Yes                            | No                                   | Lymphoma, Intermediate to Large Cell | B-cell                            | NA                                     | Disseminated/ Metastatic           | >5cm       | NA                      | NA                                      | NA                                                 | NA                                             | NA                     | Positive             | No                                         |
| 0794    | No       | NA                               | No           | Yes         | 12.17 | Female | No           | 30.06       | Mixed-breed             | NA                    | 2.0       | 0.0     | Yes                            | No                                   | Urinary Bladder/Urethra              | NA                                | Localized/Regional                     | NA                                 | <=5cm      | NA                      | NA                                      | NA                                                 | NA                                             | NA                     | Negative             | No                                         |
| 0795    | No       | NA                               | No           | Yes         | 8.08  | Female | Yes          | 21.95       | Mixed-breed             | NA                    | 2.0       | NA      | Yes                            | No                                   | Lymphoma, Intermediate to Large Cell | T-Cell                            | NA                                     | Disseminated/ Metastatic           | <=5cm      | NA                      | NA                                      | NA                                                 | NA                                             | NA                     | Positive             | No                                         |
| 0796    | Yes      | Test failure                     | No           | No          | 12.17 | Female | Yes          | 26.05       | Mixed-breed             | NA                    | 0.5       | 1.0     | Yes                            | No                                   | NA                                   | NA                                | NA                                     | NA                                 | NA         | NA                      | NA                                      | NA                                                 | NA                                             | NA                     | Negative             | No                                         |
| 0797    | No       | NA                               | No           | Yes         | 7.00  | Male   | No           | 40.08       | Mixed-breed             | NA                    | 1.0       | NA      | Yes                            | No                                   | Lymphoma, Intermediate to Large Cell | T-Cell                            | NA                                     | Disseminated/ Metastatic           | <=5cm      | NA                      | NA                                      | NA                                                 | NA                                             | NA                     | Positive             | No                                         |
| 0798    | No       | NA                               | No           | Yes         | 7.08  | Female | Yes          | 13.53       | Mixed-breed             | NA                    | 3.0       | 2.0     | Yes                            | No                                   | Nasal Cavity and Paranasal Sinuses   | NA                                | Localized/Regional                     | NA                                 | <=5cm      | NA                      | NA                                      | NA                                                 | NA                                             | NA                     | Negative             | No                                         |
| 0799    | No       | NA                               | No           | Yes         | 6.50  | Male   | Yes          | 31.37       | Purebred                | Greyhound             | 4.0       | 2.0     | Yes                            | No                                   | Lymphoma, Intermediate to Large Cell | UNK                               | NA                                     | Disseminated/ Metastatic           | <=5cm      | NA                      | NA                                      | NA                                                 | NA                                             | NA                     | Negative             | No                                         |
| 0800    | No       | NA                               | Yes          | No          | 10.58 | Male   | Yes          | 13.23       | Purebred                | Shetland Sheepdog     | 3.0       | 2.0     | Yes                            | No                                   | Lymphoma, Intermediate to Large Cell | UNK                               | NA                                     | Disseminated/ Metastatic           | >5cm       | NA                      | NA                                      | NA                                                 | NA                                             | NA                     | Positive             | No                                         |
| 0801    | No       | NA                               | No           | Yes         | 8.00  | Male   | Yes          | 34.07       | Mixed-breed             | NA                    | 2.0       | 2.0     | Yes                            | No                                   | Nasal Cavity and Paranasal Sinuses   | NA                                | Localized/Regional                     | NA                                 | <=5cm      | NA                      | NA                                      | NA                                                 | NA                                             | NA                     | Negative             | No                                         |
| 0802    | No       | NA                               | No           | Yes         | 10.17 | Female | Yes          | 34.47       | Purebred                | Labrador Retriever    | 0.0       | 2.0     | Yes                            | No                                   | Oral Cavity                          | NA                                | Localized/Regional                     | NA                                 | >5cm       | NA                      | NA                                      | NA                                                 | NA                                             | NA                     | Negative             | No                                         |
| 0803    | No       | NA                               | No           | Yes         | 11.50 | Female | Yes          | 31.06       | Mixed-breed             | NA                    | 3.0       | 2.0     | Yes                            | No                                   | Lymphoma, Intermediate to Large Cell | B-cell                            | NA                                     | Disseminated/ Metastatic           | <=5cm      | NA                      | NA                                      | NA                                                 | NA                                             | NA                     | Positive             | Yes                                        |
| 0804    | No       | NA                               | Yes          | No          | 10.83 | Female | Yes          | 18.94       | Mixed-breed             | NA                    | 2.0       | 2.0     | Yes                            | No                                   | Lymphoma, Intermediate to Large Cell | UNK                               | NA                                     | Disseminated/ Metastatic           | >5cm       | NA                      | NA                                      | NA                                                 | NA                                             | NA                     | Positive             | No                                         |
| 0805    | Yes      | Laboratory Workflow Deviation    | No           | No          | 14.00 | Female | Yes          | 7.22        | Mixed-breed             | NA                    | 4.0       | 2.0     | Yes                            | No                                   | NA                                   | NA                                | NA                                     | NA                                 | NA         | NA                      | NA                                      | NA                                                 | NA                                             | NA                     | Positive             | No                                         |
| 0806    | No       | NA                               | No           | Yes         | 10.25 | Female | Yes          | 17.34       | Purebred                | Dalmation             | 2.0       | 2.0     | Yes                            | No                                   | Nasal Cavity and Paranasal Sinuses   | NA                                | Localized/Regional                     | NA                                 | <=5cm      | NA                      | NA                                      | NA                                                 | NA                                             | NA                     | Negative             | No                                         |
| 0807    | No       | NA                               | No           | Yes         | 5.50  | Male   | No           | 46.00       | Purebred                | German Shepherd       | 2.0       | 2.0     | Yes                            | No                                   | Lymphoma, Intermediate to Large Cell | B-cell                            | NA                                     | Disseminated/ Metastatic           | <=5cm      | NA                      | NA                                      | NA                                                 | NA                                             | NA                     | Positive             | No                                         |
| 0808    | No       | NA                               | No           | Yes         | 12.00 | Female | Yes          | 35.77       | Mixed-breed             | NA                    | 3.5       | 2.0     | Yes                            | No                                   | Mammary Gland Carcinoma              | NA                                | Localized/Regional                     | NA                                 | >5cm       | NA                      | NA                                      | NA                                                 | NA                                             | NA                     | Positive             | No                                         |
| 0809    | No       | NA                               | Yes          | No          | 2.00  | Female | No           | 20.04       | Mixed-breed             | NA                    | 0.0       | 1.0     | Yes                            | No                                   | Transmissible Venereal Tumor         | NA                                | Localized/Regional                     | NA                                 | <=5cm      | NA                      | NA                                      | NA                                                 | NA                                             | NA                     | Positive             | No                                         |
| 0810    | No       | NA                               | No           | Yes         | 12.00 | Male   | Yes          | 20.24       | Mixed-breed             | NA                    | 1.0       | 2.0     | Yes                            | No                                   | Skin                                 | NA                                | Localized/Regional                     | NA                                 | >5cm       | NA                      | NA                                      | NA                                                 | NA                                             | NA                     | Positive             | No                                         |
| 0811    | No       | NA                               | No           | Yes         | 3.08  | Female | Yes          | 20.04       | Mixed-breed             | NA                    | 1.0       | 2.0     | Yes                            | No                                   | Transmissible Venereal Tumor         | NA                                | Localized/Regional                     | NA                                 | <=5cm      | NA                      | NA                                      | NA                                                 | NA                                             | NA                     | Negative             | No                                         |
| 0812    | No       | NA                               | No           | Yes         | 14.08 | Male   | Yes          | 10.52       | Purebred                | Cocker Spaniel        | 3.0       | 2.0     | Yes                            | No                                   | Nasal Cavity and Paranasal Sinuses   | NA                                | Undetermined                           | NA                                 | >5cm       | NA                      | NA                                      | NA                                                 | NA                                             | NA                     | Negative             | No                                         |
| 0813    | No       | NA                               | No           | Yes         | 9.00  | Female | Yes          | 30.56       | Mixed-breed             | NA                    | 3.0       | 2.0     | Yes                            | No                                   | Leukemia, Chronic Lymphoid (CLL)     | B-cell                            | NA                                     | Disseminated/ Metastatic           | NA         | NA                      | NA                                      | NA                                                 | NA                                             | NA                     | Positive             | No                                         |
| 0814    | No       | NA                               | Yes          | No          | 9.00  | Male   | Yes          | 52.41       | Purebred                | Bernese Mountain Dogs | 1.0       | 2.0     | Yes                            | No                                   | Mast Cell Tumor                      | NA                                | Localized/Regional                     | NA                                 | <=5cm      | NA                      | NA                                      | NA                                                 | NA                                             | NA                     | Negative             | No                                         |
| 0815    | No       | NA                               | No           | Yes         | 6.67  | Male   | Yes          | 43.89       | Mixed-breed             | NA                    | 2.5       | NA      | Yes                            | No                                   | Lymphoma, Intermediate to Large Cell | B-cell                            | NA                                     | Disseminated/ Metastatic           | >5cm       | NA                      | NA                                      | NA                                                 | NA                                             | NA                     | Positive             | No                                         |
| 0816    | No       | NA                               | No           | Yes         | 8.00  | Female | Yes          | 31.87       | Mixed-breed             | NA                    | 3.0       | 2.0     | Yes                            | No                                   | Lymphoma, Intermediate to Large Cell | UNK                               | NA                                     | Disseminated/ Metastatic           | <=5cm      | NA                      | NA                                      | NA                                                 | NA                                             | NA                     | Positive             | No                                         |

S1 Table. Full subject level data for subjects enrolled in the CANDiD study (continued)

See legend on last page.

| Subject | Excluded | Reason for Exclusion             | Training Set | Testing Set | Age   | Sex    | Spay/ Neuter | Weight (kg) | Purebred or Mixed Breed | Breed (Purebred)           | Hemolysis | Lipemia | Cancer Diagnosis at Enrollment | Cancer Diagnosed after Liquid Biopsy | Cancer Type                          | Immunophenotype (Lymphoid Cancer) | Extent of Disease: Non-Lymphoid Cancer | Extent of Disease: Lymphoid Cancer | Tumor Size | Cancer Type (Cancer #2) | Immunophenotype (Cancer #2 if Lymphoid) | Extent of Disease: Non-Lymphoid Cancer (Cancer #2) | Extent of Disease: Lymphoid Cancer (Cancer #2) | Tumor Size (Cancer #2) | Liquid Biopsy Result | CSO Prediction of Hematological Malignancy |
|---------|----------|----------------------------------|--------------|-------------|-------|--------|--------------|-------------|-------------------------|----------------------------|-----------|---------|--------------------------------|--------------------------------------|--------------------------------------|-----------------------------------|----------------------------------------|------------------------------------|------------|-------------------------|-----------------------------------------|----------------------------------------------------|------------------------------------------------|------------------------|----------------------|--------------------------------------------|
| 0817    | No       | NA                               | No           | Yes         | 8.83  | Male   | Yes          | 17.24       | Purebred                | Beagle                     | 2.0       | NA      | Yes                            | No                                   | Lymphoma, Intermediate to Large Cell | UNK                               | NA                                     | Disseminated/ Metastatic           | <=5cm      | NA                      | NA                                      | NA                                                 | NA                                             | NA                     | Positive             | Yes                                        |
| 0818    | No       | NA                               | No           | Yes         | 14.00 | Male   | Yes          | 15.23       | Mixed-breed             | NA                         | 4.0       | 2.0     | Yes                            | No                                   | Urinary Bladder/Urethra              | NA                                | Localized/Regional                     | NA                                 | <=5cm      | NA                      | NA                                      | NA                                                 | NA                                             | NA                     | Negative             | No                                         |
| 0819    | Yes      | Test failure                     | No           | No          | 9.00  | Male   | No           | 33.37       | Purebred                | Bernese Mountain Dogs      | NA        | NA      | Yes                            | No                                   | Urinary Bladder/Urethra              | NA                                | Localized/Regional                     | NA                                 | <=5cm      | NA                      | NA                                      | NA                                                 | NA                                             | NA                     | Negative             | No                                         |
| 0820    | No       | NA                               | No           | Yes         | 14.00 | Female | Yes          | 23.25       | Mixed-breed             | NA                         | 3.5       | 2.0     | Yes                            | No                                   | Lymphoma, Intermediate to Large Cell | UNK                               | NA                                     | Disseminated/ Metastatic           | <=5cm      | NA                      | NA                                      | NA                                                 | NA                                             | NA                     | Positive             | No                                         |
| 0821    | No       | NA                               | Yes          | No          | 7.58  | Male   | Yes          | 35.07       | Mixed-breed             | NA                         | 4.0       | 2.0     | Yes                            | No                                   | Lymphoma, Intermediate to Large Cell | UNK                               | NA                                     | Disseminated/ Metastatic           | >5cm       | NA                      | NA                                      | NA                                                 | NA                                             | NA                     | Positive             | No                                         |
| 0822    | No       | NA                               | No           | Yes         | 6.42  | Male   | Yes          | 29.76       | Mixed-breed             | NA                         | 3.0       | 2.0     | Yes                            | No                                   | Lymphoma, Intermediate to Large Cell | B-cell                            | NA                                     | Disseminated/ Metastatic           | >5cm       | NA                      | NA                                      | NA                                                 | NA                                             | NA                     | Positive             | No                                         |
| 0823    | No       | NA                               | No           | Yes         | 12.92 | Female | Yes          | 22.65       | Mixed-breed             | NA                         | 4.0       | 2.0     | Yes                            | No                                   | Lymphoma, Intermediate to Large Cell | B-cell                            | NA                                     | Disseminated/ Metastatic           | >5cm       | NA                      | NA                                      | NA                                                 | NA                                             | NA                     | Positive             | Yes                                        |
| 0824    | No       | NA                               | No           | Yes         | 6.42  | Male   | Yes          | 40.08       | Purebred                | Doberman Pinscher          | 4.0       | 2.0     | Yes                            | No                                   | Mast Cell Tumor                      | NA                                | Localized/Regional                     | NA                                 | >5cm       | NA                      | NA                                      | NA                                                 | NA                                             | NA                     | Positive             | No                                         |
| 0825    | No       | NA                               | No           | Yes         | 10.50 | Male   | Yes          | 67.34       | Mixed-breed             | NA                         | 2.0       | 2.0     | Yes                            | No                                   | Lymphoma, Intermediate to Large Cell | T-Cell                            | NA                                     | Disseminated/ Metastatic           | >5cm       | NA                      | NA                                      | NA                                                 | NA                                             | NA                     | Positive             | No                                         |
| 0826    | No       | NA                               | No           | Yes         | 10.00 | Male   | Yes          | 30.26       | Mixed-breed             | NA                         | 1.5       | 1.0     | Yes                            | No                                   | Lymphoma, Intermediate to Large Cell | B-cell                            | NA                                     | Disseminated/ Metastatic           | >5cm       | NA                      | NA                                      | NA                                                 | NA                                             | NA                     | Positive             | Yes                                        |
| 0827    | No       | NA                               | Yes          | No          | 13.00 | Female | Yes          | 35.47       | Mixed-breed             | NA                         | 4.0       | 2.0     | Yes                            | No                                   | Mast Cell Tumor                      | NA                                | Disseminated/Metastatic                | NA                                 | >5cm       | NA                      | NA                                      | NA                                                 | NA                                             | NA                     | Negative             | No                                         |
| 0828    | No       | NA                               | Yes          | No          | 10.58 | Female | Yes          | 22.25       | Purebred                | English Bulldog            | 1.0       | 2.0     | Yes                            | No                                   | Soft Tissue Sarcoma                  | NA                                | Undetermined                           | NA                                 | <=5cm      | NA                      | NA                                      | NA                                                 | NA                                             | NA                     | Positive             | No                                         |
| 0829    | No       | NA                               | No           | Yes         | 8.75  | Male   | Yes          | 22.15       | Mixed-breed             | NA                         | 2.0       | 1.0     | Yes                            | No                                   | Hemangiosarcoma                      | NA                                | Disseminated/Metastatic                | NA                                 | >5cm       | NA                      | NA                                      | NA                                                 | NA                                             | NA                     | Positive             | No                                         |
| 0830    | No       | NA                               | No           | Yes         | 11.25 | Female | Yes          | 28.36       | Mixed-breed             | NA                         | 2.5       | 2.0     | Yes                            | No                                   | Urinary Bladder/Urethra              | NA                                | Undetermined                           | NA                                 | <=5cm      | NA                      | NA                                      | NA                                                 | NA                                             | NA                     | Negative             | No                                         |
| 0831    | No       | NA                               | No           | Yes         | 9.33  | Female | Yes          | 19.34       | Mixed-breed             | NA                         | 3.5       | 2.0     | Yes                            | No                                   | Urinary Bladder/Urethra              | NA                                | Localized/Regional                     | NA                                 | <=5cm      | NA                      | NA                                      | NA                                                 | NA                                             | NA                     | Negative             | No                                         |
| 0832    | No       | NA                               | No           | Yes         | 7.75  | Male   | Yes          | 39.78       | Mixed-breed             | NA                         | 3.0       | 2.0     | Yes                            | No                                   | Lymphoma, Intermediate to Large Cell | B-cell                            | NA                                     | Disseminated/ Metastatic           | <=5cm      | NA                      | NA                                      | NA                                                 | NA                                             | NA                     | Positive             | No                                         |
| 0833    | No       | NA                               | No           | Yes         | 9.42  | Male   | Yes          | 30.56       | Mixed-breed             | NA                         | 2.0       | 1.0     | Yes                            | No                                   | Mast Cell Tumor                      | NA                                | Disseminated/Metastatic                | NA                                 | <=5cm      | NA                      | NA                                      | NA                                                 | NA                                             | NA                     | Positive             | No                                         |
| 0834    | No       | NA                               | No           | Yes         | 10.50 | Male   | Yes          | 19.54       | Purebred                | Basset Hound               | 4.0       | 2.0     | Yes                            | No                                   | Anal Sac                             | NA                                | Localized/Regional                     | NA                                 | >5cm       | NA                      | NA                                      | NA                                                 | NA                                             | NA                     | Positive             | No                                         |
| 0835    | No       | NA                               | No           | Yes         | 9.67  | Male   | Yes          | 25.85       | Purebred                | English Springer Spaniel   | 2.5       | 2.0     | Yes                            | No                                   | Anal Sac                             | NA                                | Disseminated/Metastatic                | NA                                 | >5cm       | NA                      | NA                                      | NA                                                 | NA                                             | NA                     | Positive             | No                                         |
| 0836    | No       | NA                               | No           | Yes         | 13.83 | Male   | Yes          | 34.97       | Purebred                | Poodle, Standard           | 4.0       | 2.0     | Yes                            | No                                   | Nasal Cavity and Paranasal Sinuses   | NA                                | Disseminated/Metastatic                | NA                                 | <=5cm      | NA                      | NA                                      | NA                                                 | NA                                             | NA                     | Positive             | No                                         |
| 0837    | No       | NA                               | No           | Yes         | 4.08  | Female | Yes          | 16.53       | Mixed-breed             | NA                         | 4.0       | 2.0     | Yes                            | No                                   | Lymphoma, Intermediate to Large Cell | UNK                               | NA                                     | Disseminated/ Metastatic           | UNK        | NA                      | NA                                      | NA                                                 | NA                                             | NA                     | Positive             | Yes                                        |
| 0838    | No       | NA                               | No           | Yes         | 6.42  | Male   | Yes          | 30.06       | Mixed-breed             | NA                         | 0.5       | 1.0     | Yes                            | No                                   | Mast Cell Tumor                      | NA                                | Localized/Regional                     | NA                                 | >5cm       | NA                      | NA                                      | NA                                                 | NA                                             | NA                     | Negative             | No                                         |
| 0839    | No       | NA                               | No           | Yes         | 11.42 | Female | Yes          | 23.35       | Mixed-breed             | NA                         | 2.0       | 2.0     | Yes                            | No                                   | Lymphoma, Intermediate to Large Cell | B-cell                            | NA                                     | Disseminated/ Metastatic           | <=5cm      | NA                      | NA                                      | NA                                                 | NA                                             | NA                     | Positive             | Yes                                        |
| 0840    | No       | NA                               | No           | Yes         | 9.67  | Female | Yes          | 41.79       | Purebred                | Rottweiler                 | 2.0       | 2.0     | Yes                            | No                                   | Anal Sac                             | NA                                | Localized/Regional                     | NA                                 | <=5cm      | NA                      | NA                                      | NA                                                 | NA                                             | NA                     | Negative             | No                                         |
| 0841    | No       | NA                               | No           | Yes         | 10.50 | Male   | Yes          | 36.88       | Purebred                | Golden Retriever           | 4.0       | 2.0     | Yes                            | No                                   | Soft Tissue Sarcoma                  | NA                                | Disseminated/Metastatic                | NA                                 | >5cm       | NA                      | NA                                      | NA                                                 | NA                                             | NA                     | Positive             | No                                         |
| 0842    | No       | NA                               | No           | Yes         | 7.17  | Male   | Yes          | 51.01       | Mixed-breed             | NA                         | 2.0       | 1.0     | Yes                            | No                                   | Lymphoma, Intermediate to Large Cell | UNK                               | NA                                     | Disseminated/ Metastatic           | <=5cm      | NA                      | NA                                      | NA                                                 | NA                                             | NA                     | Positive             | Yes                                        |
| 0843    | Yes      | Laboratory Workflow Deviation    | No           | No          | NA    | NA     | NA           | NA          | NA                      | NA                         | 3.0       | 1.0     | Yes                            | No                                   | NA                                   | NA                                | NA                                     | NA                                 | NA         | NA                      | NA                                      | NA                                                 | NA                                             | NA                     | Negative             | No                                         |
| 0844    | No       | NA                               | Yes          | No          | 10.42 | Female | Yes          | 17.54       | Mixed-breed             | NA                         | 2.5       | 2.0     | Yes                            | No                                   | Mast Cell Tumor                      | NA                                | Localized/Regional                     | NA                                 | >5cm       | NA                      | NA                                      | NA                                                 | NA                                             | NA                     | Positive             | No                                         |
| 0845    | No       | NA                               | Yes          | No          | 5.25  | Male   | Yes          | 13.63       | Purebred                | French Bulldog             | 2.5       | 2.0     | Yes                            | No                                   | Mast Cell Tumor                      | NA                                | Localized/Regional                     | NA                                 | <=5cm      | NA                      | NA                                      | NA                                                 | NA                                             | NA                     | Positive             | No                                         |
| 0846    | No       | NA                               | No           | Yes         | 11.08 | Male   | Yes          | 30.66       | Mixed-breed             | NA                         | 2.0       | NA      | Yes                            | No                                   | Lymphoma, Intermediate to Large Cell | B-cell                            | NA                                     | Disseminated/ Metastatic           | <=5cm      | NA                      | NA                                      | NA                                                 | NA                                             | NA                     | Positive             | Yes                                        |
| 0847    | No       | NA                               | No           | Yes         | 8.00  | Female | Yes          | 37.98       | Purebred                | German Shepherd            | 3.0       | NA      | Yes                            | No                                   | Mast Cell Tumor                      | NA                                | Localized/Regional                     | NA                                 | <=5cm      | NA                      | NA                                      | NA                                                 | NA                                             | NA                     | Negative             | No                                         |
| 0848    | No       | NA                               | Yes          | No          | 4.00  | Male   | Yes          | 25.65       | Mixed-breed             | NA                         | 1.0       | 2.0     | Yes                            | No                                   | Lymphoma, Intermediate to Large Cell | T-Cell                            | NA                                     | Disseminated/ Metastatic           | <=5cm      | NA                      | NA                                      | NA                                                 | NA                                             | NA                     | Positive             | No                                         |
| 0849    | No       | NA                               | Yes          | No          | 4.92  | Female | Yes          | 23.75       | Mixed-breed             | NA                         | 2.0       | 2.0     | Yes                            | No                                   | Lymphoma, Intermediate to Large Cell | B-cell                            | NA                                     | Disseminated/ Metastatic           | <=5cm      | NA                      | NA                                      | NA                                                 | NA                                             | NA                     | Positive             | No                                         |
| 0850    | No       | NA                               | No           | Yes         | 9.50  | Female | Yes          | 27.36       | Purebred                | Golden Retriever           | 1.0       | 2.0     | Yes                            | No                                   | Lymphoma, Intermediate to Large Cell | B-cell                            | NA                                     | Disseminated/ Metastatic           | >5cm       | NA                      | NA                                      | NA                                                 | NA                                             | NA                     | Positive             | No                                         |
| 0851    | No       | NA                               | No           | Yes         | 10.00 | Female | Yes          | 13.73       | Mixed-breed             | NA                         | 3.5       | 2.0     | Yes                            | No                                   | Soft Tissue Sarcoma                  | NA                                | Localized/Regional                     | NA                                 | <=5cm      | NA                      | NA                                      | NA                                                 | NA                                             | NA                     | Negative             | No                                         |
| 0852    | No       | NA                               | No           | Yes         | 6.00  | Male   | Yes          | 31.87       | Purebred                | Golden Retriever           | 4.0       | 2.0     | Yes                            | No                                   | Anal Sac                             | NA                                | Localized/Regional                     | NA                                 | >5cm       | NA                      | NA                                      | NA                                                 | NA                                             | NA                     | Negative             | No                                         |
| 0853    | No       | NA                               | Yes          | No          | 8.92  | Female | Yes          | 22.35       | Purebred                | Labrador Retriever         | 4.0       | 2.0     | Yes                            | No                                   | Thymoma                              | NA                                | Undetermined                           | NA                                 | <=5cm      | NA                      | NA                                      | NA                                                 | NA                                             | NA                     | Negative             | No                                         |
| 0854    | No       | NA                               | No           | Yes         | 8.83  | Male   | No           | 38.88       | Purebred                | Golden Retriever           | 1.0       | 1.0     | Yes                            | No                                   | Nasal Cavity and Paranasal Sinuses   | NA                                | Localized/Regional                     | NA                                 | <=5cm      | NA                      | NA                                      | NA                                                 | NA                                             | NA                     | Negative             | No                                         |
| 0855    | No       | NA                               | No           | Yes         | 7.00  | Female | Yes          | 22.05       | Purebred                | Barbet                     | 1.0       | 1.0     | Yes                            | No                                   | Brain                                | NA                                | Localized/Regional                     | NA                                 | <=5cm      | NA                      | NA                                      | NA                                                 | NA                                             | NA                     | Negative             | No                                         |
| 0856    | No       | NA                               | Yes          | No          | 6.92  | Male   | Yes          | 16.84       | Mixed-breed             | NA                         | 2.0       | 2.0     | Yes                            | No                                   | Prostate                             | NA                                | Localized/Regional                     | NA                                 | <=5cm      | NA                      | NA                                      | NA                                                 | NA                                             | NA                     | Negative             | No                                         |
| 0857    | No       | NA                               | Yes          | No          | 5.67  | Male   | Yes          | 13.13       | Purebred                | Boston Terrier             | 4.0       | 2.0     | Yes                            | No                                   | Mast Cell Tumor                      | NA                                | Localized/Regional                     | NA                                 | <=5cm      | NA                      | NA                                      | NA                                                 | NA                                             | NA                     | Negative             | No                                         |
| 0858    | No       | NA                               | No           | Yes         | 8.25  | Male   | Yes          | 17.94       | Purebred                | Shetland Sheepdog          | 2.5       | 1.0     | Yes                            | No                                   | Brain                                | NA                                | Localized/Regional                     | NA                                 | <=5cm      | NA                      | NA                                      | NA                                                 | NA                                             | NA                     | Negative             | No                                         |
| 0859    | No       | NA                               | No           | Yes         | 9.00  | Male   | Yes          | 35.07       | Mixed-breed             | NA                         | 3.0       | 2.0     | Yes                            | No                                   | Prostate                             | NA                                | Localized/Regional                     | NA                                 | <=5cm      | NA                      | NA                                      | NA                                                 | NA                                             | NA                     | Negative             | No                                         |
| 0860    | No       | NA                               | No           | Yes         | 4.50  | Female | Yes          | 29.36       | Purebred                | German Shorthaired Pointer | 2.0       | 1.0     | Yes                            | No                                   | Lymphoma, Intermediate to Large Cell | B-cell                            | NA                                     | Disseminated/ Metastatic           | >5cm       | NA                      | NA                                      | NA                                                 | NA                                             | NA                     | Positive             | Yes                                        |
| 0861    | No       | NA                               | No           | Yes         | 11.17 | Female | Yes          | 12.93       | Purebred                | Pembroke Welsh Corgi       | 2.5       | 1.0     | Yes                            | No                                   | Heart Base                           | NA                                | Localized/Regional                     | NA                                 | >5cm       | NA                      | NA                                      | NA                                                 | NA                                             | NA                     | Positive             | No                                         |
| 0862    | No       | NA                               | Yes          | No          | 2.42  | Male   | Yes          | 18.34       | Purebred                | English Bulldog            | 3.0       | 1.0     | Yes                            | No                                   | Leukemia, Chronic Lymphoid (CLL)     | T-Cell                            | NA                                     | Disseminated/ Metastatic           | NA         | NA                      | NA                                      | NA                                                 | NA                                             | NA                     | Positive             | Yes                                        |
| 0863    | No       | NA                               | No           | Yes         | 6.33  | Male   | Yes          | 41.59       | Purebred                | Bernese Mountain Dogs      | 1.0       | 2.0     | Yes                            | No                                   | Histiocytic Sarcoma                  | NA                                | Undetermined                           | NA                                 | >5cm       | NA                      | NA                                      | NA                                                 | NA                                             | NA                     | Positive             | No                                         |
| 0864    | No       | NA                               | No           | Yes         | 7.83  | Male   | Yes          | 46.20       | Purebred                | German Shepherd            | 2.0       | 2.0     | Yes                            | No                                   | Lymphoma, Intermediate to Large Cell | UNK                               | NA                                     | Disseminated/ Metastatic           | <=5cm      | NA                      | NA                                      | NA                                                 | NA                                             | NA                     | Positive             | No                                         |
| 0865    | No       | NA                               | No           | Yes         | 8.00  | Male   | Yes          | 36.48       | Mixed-breed             | NA                         | 2.0       | 1.0     | Yes                            | No                                   | Urinary Bladder/Urethra              | NA                                | Localized/Regional                     | NA                                 | <=5cm      | NA                      | NA                                      | NA                                                 | NA                                             | NA                     | Negative             | No                                         |
| 0866    | No       | NA                               | No           | Yes         | 8.17  | Female | Yes          | 26.25       | Purebred                | Boxer                      | 3.0       | 2.0     | Yes                            | No                                   | Lymphoma, Intermediate to Large Cell | B-cell                            | NA                                     | Disseminated/ Metastatic           | UNK        | NA                      | NA                                      | NA                                                 | NA                                             | NA                     | Positive             | Yes                                        |
| 0867    | No       | NA                               | No           | Yes         | 9.58  | Female | Yes          | 23.85       | Mixed-breed             | NA                         | 1.0       | 0.0     | Yes                            | No                                   | Anal Sac                             | NA                                | Localized/Regional                     | NA                                 | <=5cm      | NA                      | NA                                      | NA                                                 | NA                                             | NA                     | Negative             | No                                         |
| 0868    | No       | NA                               | Yes          | No          | 6.67  | Female | Yes          | 17.84       | Purebred                | Vizslas                    | 1.5       | 2.0     | Yes                            | No                                   | Spinal Cord                          | NA                                | Localized/Regional                     | NA                                 | <=5cm      | NA                      | NA                                      | NA                                                 | NA                                             | NA                     | Negative             | No                                         |
| 0869    | Yes      | Enrollment or Clinical Deviation | No           | No          | 6.83  | Female | Yes          | 33.07       | Mixed-breed             | NA                         | 1.0       | 2.0     | Yes                            | No                                   | NA                                   | NA                                | NA                                     | NA                                 | NA         | NA                      | NA                                      | NA                                                 | NA                                             | NA                     | Negative             | No                                         |
| 0870    | No       | NA                               | No           | Yes         | 11.00 | Male   | Yes          | 34.77       | Mixed-breed             | NA                         | 1.0       | 2.0     | Yes                            | No                                   | Hemangiosarcoma                      | NA                                | Disseminated/Metastatic                | NA                                 | >5cm       | NA                      | NA                                      | NA                                                 | NA                                             | NA                     | Positive             | No                                         |
| 0871    | Yes      | Enrollment or Clinical Deviation | No           | No          | 7.00  | Male   | Yes          | 33.97       | Mixed-breed             | NA                         | 0.5       | 2.0     | Yes                            | No                                   | Malignant Melanoma                   | NA                                | Localized/Regional                     | NA                                 | <=5cm      | NA                      | NA                                      | NA                                                 | NA                                             | NA                     | Negative             | No                                         |
| 0872    | No       | NA                               | No           | Yes         | 6.92  | Male   | Yes          | 30.66       | Purebred                | Boxer                      | 1.5       | 2.0     | Yes                            | No                                   | Lymphoma, Intermediate to Large Cell | T-Cell                            | NA                                     | Disseminated/ Metastatic           | >5cm       | NA                      | NA                                      | NA                                                 | NA                                             | NA                     | Positive             | No                                         |
| 0873    | No       | NA                               | No           | Yes         | 9.50  | Male   | Yes          | 33.47       | Purebred                | Poodle, Standard           | 3.5       | NA      | Yes                            | No                                   | Soft Tissue Sarcoma                  | NA                                | Disseminated/Metastatic                | NA                                 | >5cm       | NA                      | NA                                      | NA                                                 | NA                                             | NA                     | Negative             | No                                         |
| 0874    | No       | NA                               | No           | Yes         | 8.08  | Female | Yes          | 20.24       | Mixed-breed             | NA                         | 2.0       | 1.0     | Yes                            | No                                   | Mast Cell Tumor                      | NA                                | Disseminated/Metastatic                | NA                                 | <=5cm      | NA                      | NA                                      | NA                                                 | NA                                             | NA                     | Positive             | No                                         |
| 0875    | No       | NA                               | Yes          | No          | 10.00 | Male   | Yes          | 48.90       | Purebred                | Labrador Retriever         | 3.0       | 2.0     | Yes                            | No                                   | Bone, Osteosarcoma                   | NA                                | Localized/Regional                     | NA                                 | >5cm       | NA                      | NA                                      | NA                                                 | NA                                             | NA                     | Positive             | No                                         |

S1 Table. Full subject level data for subjects enrolled in the CANDiD study (continued)

See legend on last page.

| Subject | Excluded | Reason for Exclusion | Training Set | Testing Set | Age   | Sex    | Spay/ Neuter | Weight (kg) | Purebred or Mixed Breed | Breed (Purebred)      | Hemolysis | Lipemia | Cancer Diagnosis at Enrollment | Cancer Diagnosed after Liquid Biopsy | Cancer Type                          | Immunophenotype (Lymphoid Cancer) | Extent of Disease: Non-Lymphoid Cancer | Extent of Disease: Lymphoid Cancer | Tumor Size | Cancer Type (Cancer #2) | Immunophenotype (Cancer #2 if Lymphoid) | Extent of Disease: Non-Lymphoid Cancer (Cancer #2) | Extent of Disease: Lymphoid Cancer (Cancer #2) | Tumor Size (Cancer #2) | Liquid Biopsy Result | CSO Prediction of Hematological Malignancy |
|---------|----------|----------------------|--------------|-------------|-------|--------|--------------|-------------|-------------------------|-----------------------|-----------|---------|--------------------------------|--------------------------------------|--------------------------------------|-----------------------------------|----------------------------------------|------------------------------------|------------|-------------------------|-----------------------------------------|----------------------------------------------------|------------------------------------------------|------------------------|----------------------|--------------------------------------------|
| 0876    | No       | NA                   | No           | Yes         | 7.08  | Male   | Yes          | 57.52       | Purebred                | German Shepherd       | 2.5       | 1.0     | Yes                            | No                                   | Lymphoma, Intermediate to Large Cell | B-cell                            | NA                                     | Disseminated/ Metastatic           | <=5cm      | NA                      | NA                                      | NA                                                 | NA                                             | NA                     | Positive             | No                                         |
| 0877    | No       | NA                   | Yes          | No          | 15.58 | Female | Yes          | 15.23       | Purebred                | Cocker Spaniel        | 2.0       | 2.0     | Yes                            | No                                   | Lung                                 | NA                                | Localized/Regional                     | NA                                 | <=5cm      | NA                      | NA                                      | NA                                                 | NA                                             | NA                     | Negative             | No                                         |
| 0878    | No       | NA                   | No           | Yes         | 14.00 | Male   | Yes          | 13.63       | Purebred                | Beagle                | 0.0       | 1.0     | Yes                            | No                                   | Lymphoma, Intermediate to Large Cell | UNK                               | NA                                     | Disseminated/ Metastatic           | UNK        | NA                      | NA                                      | NA                                                 | NA                                             | NA                     | Positive             | No                                         |
| 0879    | No       | NA                   | No           | Yes         | 7.08  | Female | Yes          | 33.17       | Mixed-breed             | NA                    | 2.0       | 2.0     | Yes                            | No                                   | Mast Cell Tumor                      | NA                                | Localized/Regional                     | NA                                 | <=5cm      | NA                      | NA                                      | NA                                                 | NA                                             | NA                     | Negative             | No                                         |
| 0880    | No       | NA                   | No           | Yes         | 5.00  | Male   | Yes          | 42.59       | Purebred                | English Mastiff       | 1.0       | 2.0     | Yes                            | No                                   | Lymphoma, Intermediate to Large Cell | T-Cell                            | NA                                     | Disseminated/ Metastatic           | <=5cm      | NA                      | NA                                      | NA                                                 | NA                                             | NA                     | Positive             | No                                         |
| 0881    | No       | NA                   | No           | Yes         | 11.67 | Female | Yes          | 22.15       | Mixed-breed             | NA                    | 2.0       | 1.0     | Yes                            | No                                   | Lymphoma, Intermediate to Large Cell | B-cell                            | NA                                     | Disseminated/ Metastatic           | <=5cm      | NA                      | NA                                      | NA                                                 | NA                                             | NA                     | Positive             | Yes                                        |
| 0882    | No       | NA                   | No           | Yes         | 11.50 | Male   | Yes          | 44.09       | Purebred                | Golden Retriever      | 3.5       | 2.0     | Yes                            | No                                   | Nasal Cavity and Paranasal Sinuses   | NA                                | Localized/Regional                     | NA                                 | >5cm       | NA                      | NA                                      | NA                                                 | NA                                             | NA                     | Negative             | No                                         |
| 0883    | No       | NA                   | No           | Yes         | 11.92 | Female | Yes          | 22.15       | Mixed-breed             | NA                    | 2.0       | 2.0     | Yes                            | No                                   | Mast Cell Tumor                      | NA                                | Localized/Regional                     | NA                                 | >5cm       | NA                      | NA                                      | NA                                                 | NA                                             | NA                     | Positive             | No                                         |
| 0884    | No       | NA                   | No           | Yes         | 7.33  | Female | Yes          | 24.25       | Mixed-breed             | NA                    | 3.0       | 2.0     | Yes                            | No                                   | Lymphoma, Intermediate to Large Cell | B-cell                            | NA                                     | Disseminated/ Metastatic           | <=5cm      | NA                      | NA                                      | NA                                                 | NA                                             | NA                     | Positive             | Yes                                        |
| 0885    | No       | NA                   | Yes          | No          | 4.00  | Female | Yes          | 35.17       | Purebred                | Golden Retriever      | 3.0       | 2.0     | Yes                            | No                                   | Lymphoma, Intermediate to Large Cell | B-cell                            | NA                                     | Disseminated/ Metastatic           | <=5cm      | NA                      | NA                                      | NA                                                 | NA                                             | NA                     | Positive             | Yes                                        |
| 0886    | No       | NA                   | No           | Yes         | 10.92 | Male   | Yes          | 28.26       | Purebred                | German Shepherd       | 1.0       | 2.0     | Yes                            | No                                   | Anal Sac                             | NA                                | Localized/Regional                     | NA                                 | >5cm       | Histiocytic Sarcoma     | NA                                      | Localized/Regional                                 | NA                                             | >5cm                   | Positive             | Yes                                        |
| 0887    | No       | NA                   | No           | Yes         | 10.08 | Male   | Yes          | 31.06       | Mixed-breed             | NA                    | 2.0       | 2.0     | Yes                            | No                                   | Hemangiosarcoma                      | NA                                | Disseminated/Metastatic                | NA                                 | <=5cm      | NA                      | NA                                      | NA                                                 | NA                                             | NA                     | Negative             | No                                         |
| 0888    | No       | NA                   | No           | Yes         | 4.00  | Female | Yes          | 10.32       | Mixed-breed             | NA                    | 2.0       | 2.0     | Yes                            | No                                   | Mast Cell Tumor                      | NA                                | Disseminated/Metastatic                | NA                                 | >5cm       | NA                      | NA                                      | NA                                                 | NA                                             | NA                     | Positive             | No                                         |
| 0889    | No       | NA                   | No           | Yes         | 9.00  | Male   | Yes          | 14.13       | Mixed-breed             | NA                    | 3.5       | 2.0     | Yes                            | No                                   | Lymphoma, Intermediate to Large Cell | T-Cell                            | NA                                     | Disseminated/ Metastatic           | NA         | NA                      | NA                                      | NA                                                 | NA                                             | NA                     | Positive             | No                                         |
| 0890    | No       | NA                   | No           | Yes         | 12.00 | Female | Yes          | 31.47       | Purebred                | Vizslas               | 3.0       | 2.0     | Yes                            | No                                   | Lymphoma, Intermediate to Large Cell | B-cell                            | NA                                     | Disseminated/ Metastatic           | <=5cm      | NA                      | NA                                      | NA                                                 | NA                                             | NA                     | Positive             | Yes                                        |
| 0891    | No       | NA                   | No           | Yes         | 14.25 | Female | Yes          | 26.96       | Mixed-breed             | NA                    | 1.0       | 0.0     | Yes                            | No                                   | Lymphoma, Intermediate to Large Cell | UNK                               | NA                                     | Disseminated/ Metastatic           | NA         | NA                      | NA                                      | NA                                                 | NA                                             | NA                     | Positive             | No                                         |
| 0892    | No       | NA                   | No           | Yes         | 7.00  | Female | Yes          | 52.91       | Purebred                | Dogues de Bordeaux    | 1.0       | 1.0     | Yes                            | No                                   | Lymphoma, Intermediate to Large Cell | T-Cell                            | NA                                     | Disseminated/ Metastatic           | <=5cm      | NA                      | NA                                      | NA                                                 | NA                                             | NA                     | Positive             | No                                         |
| 0893    | No       | NA                   | No           | Yes         | 6.00  | Male   | Yes          | 26.76       | Mixed-breed             | NA                    | 2.5       | 2.0     | Yes                            | No                                   | Lymphoma, Intermediate to Large Cell | UNK                               | NA                                     | Disseminated/ Metastatic           | >5cm       | NA                      | NA                                      | NA                                                 | NA                                             | NA                     | Positive             | No                                         |
| 0894    | No       | NA                   | No           | Yes         | 8.58  | Female | Yes          | 31.77       | Mixed-breed             | NA                    | 3.5       | 2.0     | Yes                            | No                                   | Lymphoma, Intermediate to Large Cell | B-cell                            | NA                                     | Disseminated/ Metastatic           | <=5cm      | NA                      | NA                                      | NA                                                 | NA                                             | NA                     | Positive             | No                                         |
| 0895    | No       | NA                   | No           | Yes         | 11.33 | Male   | Yes          | 44.89       | Purebred                | Golden Retriever      | NA        | 0.5     | Yes                            | No                                   | Lymphoma, Intermediate to Large Cell | B-cell                            | NA                                     | Disseminated/ Metastatic           | >5cm       | NA                      | NA                                      | NA                                                 | NA                                             | NA                     | Positive             | No                                         |
| 0896    | No       | NA                   | No           | Yes         | 7.50  | Male   | Yes          | 30.26       | Mixed-breed             | NA                    | 2.0       | 0.0     | Yes                            | No                                   | Bone, Osteosarcoma                   | NA                                | Localized/Regional                     | NA                                 | >5cm       | NA                      | NA                                      | NA                                                 | NA                                             | NA                     | Positive             | No                                         |
| 0897    | No       | NA                   | No           | Yes         | 12.33 | Female | Yes          | 47.80       | Purebred                | Rhodesian Ridgeback   | 3.0       | 1.5     | Yes                            | No                                   | Skin                                 | NA                                | Localized/Regional                     | NA                                 | <=5cm      | NA                      | NA                                      | NA                                                 | NA                                             | NA                     | Negative             | No                                         |
| 0898    | No       | NA                   | Yes          | No          | 11.00 | Male   | Yes          | 28.96       | Purebred                | Border Collie         | 3.5       | 1.0     | Yes                            | No                                   | Lymphoma, Intermediate to Large Cell | B-cell                            | NA                                     | Disseminated/ Metastatic           | >5cm       | NA                      | NA                                      | NA                                                 | NA                                             | NA                     | Positive             | Yes                                        |
| 0899    | No       | NA                   | No           | Yes         | 10.42 | Female | Yes          | 37.28       | Purebred                | German Shepherd       | NA        | 2.0     | Yes                            | No                                   | Lymphoma, Intermediate to Large Cell | B-cell                            | NA                                     | Disseminated/ Metastatic           | UNK        | NA                      | NA                                      | NA                                                 | NA                                             | NA                     | Positive             | No                                         |
| 0900    | No       | NA                   | No           | Yes         | 12.00 | Male   | Yes          | 14.83       | Mixed-breed             | NA                    | 3.0       | 2.0     | Yes                            | No                                   | Lymphoma, Intermediate to Large Cell | UNK                               | NA                                     | Disseminated/ Metastatic           | >5cm       | NA                      | NA                                      | NA                                                 | NA                                             | NA                     | Positive             | No                                         |
| 0901    | No       | NA                   | No           | Yes         | 10.83 | Male   | Yes          | 9.22        | Purebred                | Scottish Terrier      | 3.0       | 2.0     | Yes                            | No                                   | Mast Cell Tumor                      | NA                                | Localized/Regional                     | NA                                 | <=5cm      | NA                      | NA                                      | NA                                                 | NA                                             | NA                     | Negative             | No                                         |
| 0902    | No       | NA                   | No           | Yes         | 11.08 | Male   | Yes          | 20.74       | Mixed-breed             | NA                    | 2.5       | 2.0     | Yes                            | No                                   | Lymphoma, Intermediate to Large Cell | B-cell                            | NA                                     | Disseminated/ Metastatic           | >5cm       | NA                      | NA                                      | NA                                                 | NA                                             | NA                     | Positive             | Yes                                        |
| 0903    | No       | NA                   | No           | Yes         | 8.75  | Female | Yes          | 27.26       | Purebred                | Doberman Pinscher     | 2.0       | 2.0     | Yes                            | No                                   | Lymphoma, Intermediate to Large Cell | B-cell                            | NA                                     | Disseminated/ Metastatic           | <=5cm      | NA                      | NA                                      | NA                                                 | NA                                             | NA                     | Positive             | No                                         |
| 0904    | No       | NA                   | Yes          | No          | 7.75  | Female | Yes          | 21.04       | Purebred                | English Bulldog       | 3.0       | 2.0     | Yes                            | No                                   | Lymphoma, Intermediate to Large Cell | PARR NEGATIVE                     | NA                                     | Disseminated/ Metastatic           | <=5cm      | NA                      | NA                                      | NA                                                 | NA                                             | NA                     | Positive             | Yes                                        |
| 0905    | No       | NA                   | No           | Yes         | 7.42  | Male   | Yes          | 46.50       | Purebred                | Rottweiler            | 1.0       | 1.0     | Yes                            | No                                   | Lymphoma, Intermediate to Large Cell | B-cell                            | NA                                     | Disseminated/ Metastatic           | >5cm       | NA                      | NA                                      | NA                                                 | NA                                             | NA                     | Positive             | Yes                                        |
| 0906    | No       | NA                   | No           | Yes         | 8.58  | Female | Yes          | 30.76       | Mixed-breed             | NA                    | NA        | 0.0     | Yes                            | No                                   | Chondrosarcoma                       | NA                                | Localized/Regional                     | NA                                 | >5cm       | NA                      | NA                                      | NA                                                 | NA                                             | NA                     | Positive             | No                                         |
| 0907    | No       | NA                   | No           | Yes         | 12.42 | Female | Yes          | 30.46       | Mixed-breed             | NA                    | 3.0       | 2.0     | Yes                            | No                                   | Oral Cavity                          | NA                                | Localized/Regional                     | NA                                 | <=5cm      | NA                      | NA                                      | NA                                                 | NA                                             | NA                     | Negative             | No                                         |
| 0908    | No       | NA                   | Yes          | No          | 10.25 | Female | Yes          | 21.75       | Mixed-breed             | NA                    | 3.0       | 1.0     | Yes                            | No                                   | Thyroid                              | NA                                | Disseminated/Metastatic                | NA                                 | >5cm       | NA                      | NA                                      | NA                                                 | NA                                             | NA                     | Positive             | No                                         |
| 0909    | No       | NA                   | No           | Yes         | 10.25 | Female | Yes          | 25.85       | Purebred                | Poodle, Standard      | 2.5       | 2.0     | Yes                            | No                                   | Lymphoma, Intermediate to Large Cell | UNK                               | NA                                     | Disseminated/ Metastatic           | >5cm       | NA                      | NA                                      | NA                                                 | NA                                             | NA                     | Positive             | No                                         |
| 0910    | No       | NA                   | No           | Yes         | 10.00 | Female | Yes          | 33.67       | Mixed-breed             | NA                    | 3.0       | 2.0     | Yes                            | No                                   | Mast Cell Tumor                      | NA                                | Localized/Regional                     | NA                                 | <=5cm      | NA                      | NA                                      | NA                                                 | NA                                             | NA                     | Negative             | No                                         |
| 0911    | No       | NA                   | No           | Yes         | 6.17  | Female | Yes          | 24.75       | Mixed-breed             | NA                    | 1.0       | 2.0     | Yes                            | No                                   | Lymphoma, Intermediate to Large Cell | B-cell                            | NA                                     | Disseminated/ Metastatic           | >5cm       | NA                      | NA                                      | NA                                                 | NA                                             | NA                     | Positive             | No                                         |
| 0912    | No       | NA                   | No           | Yes         | 10.00 | Female | Yes          | 31.67       | Mixed-breed             | NA                    | 2.0       | 1.0     | Yes                            | No                                   | Bone, Osteosarcoma                   | NA                                | Localized/Regional                     | NA                                 | >5cm       | NA                      | NA                                      | NA                                                 | NA                                             | NA                     | Positive             | No                                         |
| 0913    | No       | NA                   | No           | Yes         | 6.00  | Female | Yes          | 29.26       | Purebred                | Small Munsterlander   | 2.0       | 2.0     | Yes                            | No                                   | Lymphoma, Intermediate to Large Cell | B-cell                            | NA                                     | Disseminated/ Metastatic           | >5cm       | NA                      | NA                                      | NA                                                 | NA                                             | NA                     | Positive             | No                                         |
| 0914    | No       | NA                   | Yes          | No          | 5.50  | Male   | Yes          | 21.44       | Mixed-breed             | NA                    | 0.0       | 2.0     | Yes                            | No                                   | Leukemia, Acute Lymphoid (ALL)       | T-Cell                            | NA                                     | Disseminated/ Metastatic           | NA         | NA                      | NA                                      | NA                                                 | NA                                             | NA                     | Positive             | Yes                                        |
| 0915    | No       | NA                   | No           | Yes         | 8.67  | Male   | Yes          | 27.96       | Mixed-breed             | NA                    | 3.0       | 2.0     | Yes                            | No                                   | Malignant Melanoma                   | NA                                | Localized/Regional                     | NA                                 | <=5cm      | NA                      | NA                                      | NA                                                 | NA                                             | NA                     | Negative             | No                                         |
| 0916    | No       | NA                   | No           | Yes         | 5.00  | Female | No           | 28.86       | Purebred                | Boxer                 | 3.0       | 2.0     | Yes                            | No                                   | Lymphoma, Intermediate to Large Cell | B-cell                            | NA                                     | Disseminated/ Metastatic           | >5cm       | NA                      | NA                                      | NA                                                 | NA                                             | NA                     | Positive             | Yes                                        |
| 0917    | No       | NA                   | Yes          | No          | 9.17  | Female | Yes          | 31.06       | Purebred                | Boxer                 | 2.0       | 2.0     | Yes                            | No                                   | Lymphoma, Intermediate to Large Cell | B-cell                            | NA                                     | Disseminated/ Metastatic           | <=5cm      | NA                      | NA                                      | NA                                                 | NA                                             | NA                     | Positive             | Yes                                        |
| 0918    | No       | NA                   | No           | Yes         | 8.42  | Female | Yes          | 33.67       | Purebred                | Bernese Mountain Dogs | 3.5       | 2.0     | Yes                            | No                                   | Histiocytic Sarcoma                  | NA                                | Undetermined                           | NA                                 | >5cm       | NA                      | NA                                      | NA                                                 | NA                                             | NA                     | Positive             | No                                         |
| 0919    | No       | NA                   | Yes          | No          | 6.58  | Male   | Yes          | 46.30       | Purebred                | Rhodesian Ridgeback   | 1.0       | 2.0     | Yes                            | No                                   | Lymphoma, Intermediate to Large Cell | T-Cell                            | NA                                     | Disseminated/ Metastatic           | <=5cm      | NA                      | NA                                      | NA                                                 | NA                                             | NA                     | Positive             | No                                         |
| 0920    | No       | NA                   | No           | Yes         | 13.58 | Male   | Yes          | 30.16       | Purebred                | Golden Retriever      | 1.0       | 2.0     | Yes                            | No                                   | Lymphoma, Intermediate to Large Cell | B-cell                            | NA                                     | Disseminated/ Metastatic           | <=5cm      | NA                      | NA                                      | NA                                                 | NA                                             | NA                     | Positive             | Yes                                        |
| 0921    | No       | NA                   | No           | Yes         | 14.92 | Female | Yes          | 29.96       | Mixed-breed             | NA                    | 1.0       | 2.0     | Yes                            | No                                   | Lymphoma, Intermediate to Large Cell | UNK                               | NA                                     | Disseminated/ Metastatic           | <=5cm      | NA                      | NA                                      | NA                                                 | NA                                             | NA                     | Positive             | Yes                                        |
| 0922    | No       | NA                   | No           | Yes         | 8.42  | Male   | Yes          | 37.48       | Purebred                | Doberman Pinscher     | 2.5       | 2.0     | Yes                            | No                                   | Lymphoma, Intermediate to Large Cell | B-cell                            | NA                                     | Disseminated/ Metastatic           | >5cm       | NA                      | NA                                      | NA                                                 | NA                                             | NA                     | Positive             | No                                         |
| 0923    | No       | NA                   | No           | Yes         | 11.08 | Female | Yes          | 27.86       | Mixed-breed             | NA                    | 3.5       | 2.0     | Yes                            | No                                   | Lymphoma, Intermediate to Large Cell | T-Cell                            | NA                                     | Disseminated/ Metastatic           | >5cm       | NA                      | NA                                      | NA                                                 | NA                                             | NA                     | Positive             | No                                         |
| 0924    | No       | NA                   | No           | Yes         | 11.92 | Male   | Yes          | 29.36       | Mixed-breed             | NA                    | 3.0       | 2.0     | Yes                            | No                                   | Leukemia, Acute Lymphoid (ALL)       | T-Cell                            | NA                                     | Disseminated/ Metastatic           | NA         | NA                      | NA                                      | NA                                                 | NA                                             | NA                     | Positive             | No                                         |
| 0925    | No       | NA                   | No           | Yes         | 10.33 | Male   | Yes          | 40.08       | Purebred                | Poodle, Standard      | 3.0       | 2.0     | Yes                            | No                                   | Lymphoma, Intermediate to Large Cell | B-cell                            | NA                                     | Disseminated/ Metastatic           | <=5cm      | NA                      | NA                                      | NA                                                 | NA                                             | NA                     | Negative             | No                                         |
| 0926    | No       | NA                   | No           | Yes         | 10.25 | Female | Yes          | 31.06       | Purebred                | German Shepherd       | 2.0       | 1.0     | Yes                            | No                                   | Brain                                | NA                                | Localized/Regional                     | NA                                 | <=5cm      | NA                      | NA                                      | NA                                                 | NA                                             | NA                     | Positive             | No                                         |
| 0927    | No       | NA                   | No           | Yes         | 11.08 | Male   | UNK          | 30.56       | Mixed-breed             | NA                    | 4.0       | NA      | Yes                            | No                                   | Chondrosarcoma                       | NA                                | Localized/Regional                     | NA                                 | >5cm       | NA                      | NA                                      | NA                                                 | NA                                             | NA                     | Negative             | No                                         |
| 0928    | No       | NA                   | No           | Yes         | 11.33 | Male   | Yes          | 23.05       | Mixed-breed             | NA                    | 1.0       | 1.0     | Yes                            | No                                   | Nasal Cavity and Paranasal Sinuses   | NA                                | Localized/Regional                     | NA                                 | <=5cm      | NA                      | NA                                      | NA                                                 | NA                                             | NA                     | Positive             | No                                         |

S1 Table. Full subject level data for subjects enrolled in the CANDiD study (continued)

See legend on last page.

| Subject | Excluded | Reason for Exclusion             | Training Set | Testing Set | Age   | Sex    | Spay/ Neuter | Weight (kg) | Purebred or Mixed Breed | Breed (Purebred)               | Hemolysis | Lipemia | Cancer Diagnosis at Enrollment | Cancer Diagnosed after Liquid Biopsy | Cancer Type                            | Immunophenotype (Lymphoid Cancer) | Extent of Disease: Non-Lymphoid Cancer | Extent of Disease: Lymphoid Cancer | Tumor Size | Cancer Type (Cancer #2) | Immunophenotype (Cancer #2 if Lymphoid) | Extent of Disease: Non-Lymphoid Cancer (Cancer #2) | Extent of Disease: Lymphoid Cancer (Cancer #2) | Tumor Size (Cancer #2) | Liquid Biopsy Result | CSO Prediction of Hematological Malignancy |
|---------|----------|----------------------------------|--------------|-------------|-------|--------|--------------|-------------|-------------------------|--------------------------------|-----------|---------|--------------------------------|--------------------------------------|----------------------------------------|-----------------------------------|----------------------------------------|------------------------------------|------------|-------------------------|-----------------------------------------|----------------------------------------------------|------------------------------------------------|------------------------|----------------------|--------------------------------------------|
| 0929    | No       | NA                               | No           | Yes         | 8.08  | Male   | Yes          | 19.84       | Mixed-breed             | NA                             | 2.0       | 2.0     | Yes                            | No                                   | Prostate                               | NA                                | Localized/Regional                     | NA                                 | <=5cm      | NA                      | NA                                      | NA                                                 | NA                                             | NA                     | Negative             | No                                         |
| 0930    | No       | NA                               | No           | Yes         | 10.00 | Female | Yes          | 22.35       | Mixed-breed             | NA                             | 3.0       | NA      | Yes                            | No                                   | Lymphoma, Indolent                     | T ZONE                            | NA                                     | Disseminated/ Metastatic           | <=5cm      | NA                      | NA                                      | NA                                                 | NA                                             | NA                     | Positive             | Yes                                        |
| 0931    | Yes      | Laboratory Workflow Deviation    | No           | No          | 6.50  | Male   | Yes          | 29.86       | Purebred                | American Staffordshire Terrier | 4.0       | 2.0     | Yes                            | No                                   | Pituitary                              | NA                                | Localized/Regional                     | NA                                 | <=5cm      | NA                      | NA                                      | NA                                                 | NA                                             | NA                     | Negative             | No                                         |
| 0932    | No       | NA                               | Yes          | No          | 9.83  | Male   | Yes          | 47.30       | Mixed-breed             | NA                             | 4.0       | 2.0     | Yes                            | No                                   | Urinary Bladder/Urethra                | NA                                | Localized/Regional                     | NA                                 | <=5cm      | NA                      | NA                                      | NA                                                 | NA                                             | NA                     | Negative             | No                                         |
| 0933    | No       | NA                               | Yes          | No          | 14.25 | Female | Yes          | 22.05       | Mixed-breed             | NA                             | 2.5       | 2.0     | Yes                            | No                                   | Soft Tissue Sarcoma                    | NA                                | Localized/Regional                     | NA                                 | >5cm       | NA                      | NA                                      | NA                                                 | NA                                             | NA                     | Negative             | No                                         |
| 0934    | No       | NA                               | No           | Yes         | 10.08 | Female | Yes          | 21.95       | Mixed-breed             | NA                             | 2.0       | NA      | Yes                            | No                                   | Mast Cell Tumor                        | NA                                | Disseminated/Metastatic                | NA                                 | <=5cm      | NA                      | NA                                      | NA                                                 | NA                                             | NA                     | Indetermin-ate       | No                                         |
| 0935    | No       | NA                               | No           | Yes         | 9.00  | Male   | Yes          | 32.47       | Purebred                | Boxer                          | 4.0       | 1.0     | Yes                            | No                                   | Lymphoma, Intermediate to Large Cell   | B-cell                            | NA                                     | Disseminated/ Metastatic           | <=5cm      | NA                      | NA                                      | NA                                                 | NA                                             | NA                     | Positive             | Yes                                        |
| 0936    | Yes      | Enrollment or Clinical Deviation | No           | No          | 12.92 | Male   | Yes          | 22.85       | Mixed-breed             | NA                             | 2.5       | 1.0     | Yes                            | No                                   | NA                                     | NA                                | NA                                     | NA                                 | NA         | NA                      | NA                                      | NA                                                 | NA                                             | NA                     | Negative             | No                                         |
| 0937    | No       | NA                               | No           | Yes         | 11.33 | Female | Yes          | 25.65       | Purebred                | American Staffordshire Terrier | 3.5       | 1.0     | Yes                            | No                                   | Urinary Bladder/Urethra                | NA                                | Localized/Regional                     | NA                                 | NA         | NA                      | NA                                      | NA                                                 | NA                                             | NA                     | Negative             | No                                         |
| 0938    | No       | NA                               | No           | Yes         | 10.42 | Male   | Yes          | 36.98       | Purebred                | Labrador Retriever             | 2.5       | 1.5     | Yes                            | No                                   | Bone, Osteosarcoma                     | NA                                | Localized/Regional                     | NA                                 | >5cm       | NA                      | NA                                      | NA                                                 | NA                                             | NA                     | Positive             | No                                         |
| 0939    | No       | NA                               | Yes          | No          | 13.42 | Female | Yes          | 33.07       | Purebred                | American Staffordshire Terrier | 3.0       | 2.0     | Yes                            | No                                   | Lymphoma, Indolent                     | T ZONE                            | NA                                     | Localized/ Regional                | <=5cm      | NA                      | NA                                      | NA                                                 | NA                                             | NA                     | Negative             | No                                         |
| 0940    | No       | NA                               | No           | Yes         | 4.50  | Male   | Yes          | 29.06       | Purebred                | Bulldog, American              | 2.0       | 2.0     | Yes                            | No                                   | Lymphoma, Intermediate to Large Cell   | T-Cell                            | NA                                     | Disseminated/ Metastatic           | >5cm       | NA                      | NA                                      | NA                                                 | NA                                             | NA                     | Positive             | No                                         |
| 0941    | No       | NA                               | No           | Yes         | 5.33  | Female | Yes          | 35.57       | Mixed-breed             | NA                             | 2.0       | 2.0     | Yes                            | No                                   | Bone, Osteosarcoma                     | NA                                | Localized/Regional                     | NA                                 | <=5cm      | NA                      | NA                                      | NA                                                 | NA                                             | NA                     | Negative             | No                                         |
| 0942    | No       | NA                               | No           | Yes         | 2.08  | Male   | Yes          | 31.77       | Purebred                | Golden Retriever               | 0.5       | 1.0     | Yes                            | No                                   | Lymphoma, Intermediate to Large Cell   | INCONCLUSIVE                      | NA                                     | Disseminated/ Metastatic           | >5cm       | NA                      | NA                                      | NA                                                 | NA                                             | NA                     | Positive             | No                                         |
| 0943    | No       | NA                               | No           | Yes         | 6.92  | Female | Yes          | 35.47       | Purebred                | Labrador Retriever             | 2.5       | 2.5     | Yes                            | No                                   | Mast Cell Tumor                        | NA                                | Localized/Regional                     | NA                                 | >5cm       | NA                      | NA                                      | NA                                                 | NA                                             | NA                     | Positive             | No                                         |
| 0944    | No       | NA                               | No           | Yes         | 6.75  | Male   | Yes          | 26.05       | Purebred                | English Bulldog                | 2.5       | 1.5     | Yes                            | No                                   | Soft Tissue Sarcoma                    | NA                                | Disseminated/Metastatic                | NA                                 | >5cm       | NA                      | NA                                      | NA                                                 | NA                                             | NA                     | Negative             | No                                         |
| 0945    | No       | NA                               | Yes          | No          | 9.25  | Male   | Yes          | 24.35       | Mixed-breed             | NA                             | 3.0       | 2.0     | Yes                            | No                                   | Heart Base                             | NA                                | Localized/Regional                     | NA                                 | UNK        | NA                      | NA                                      | NA                                                 | NA                                             | NA                     | Positive             | No                                         |
| 0946    | Yes      | Test failure                     | No           | No          | 8.92  | Female | Yes          | 19.34       | Mixed-breed             | NA                             | 4.0       | 2.0     | Yes                            | No                                   | Lymphoma, Intermediate to Large Cell   | T-Cell                            | NA                                     | Disseminated/ Metastatic           | NA         | NA                      | NA                                      | NA                                                 | NA                                             | NA                     | Indetermin-ate       | No                                         |
| 0947    | No       | NA                               | No           | Yes         | 13.00 | Male   | Yes          | 6.91        | Mixed-breed             | NA                             | 2.0       | 1.5     | Yes                            | No                                   | Lymphoma, Indolent                     | T ZONE                            | NA                                     | Disseminated/ Metastatic           | NA         | NA                      | NA                                      | NA                                                 | NA                                             | NA                     | Negative             | No                                         |
| 0948    | No       | NA                               | No           | Yes         | 11.75 | Female | Yes          | 13.03       | Mixed-breed             | NA                             | 3.5       | 2.0     | Yes                            | No                                   | Mast Cell Tumor                        | NA                                | Localized/Regional                     | NA                                 | >5cm       | NA                      | NA                                      | NA                                                 | NA                                             | NA                     | Negative             | No                                         |
| 0949    | No       | NA                               | No           | Yes         | 9.92  | Male   | Yes          | 41.29       | Mixed-breed             | NA                             | 3.0       | 2.0     | Yes                            | No                                   | Lymphoma, Intermediate to Large Cell   | UNK                               | NA                                     | Disseminated/ Metastatic           | NA         | NA                      | NA                                      | NA                                                 | NA                                             | NA                     | Positive             | No                                         |
| 0950    | No       | NA                               | No           | Yes         | 8.00  | Female | Yes          | 24.85       | Mixed-breed             | NA                             | 3.5       | 2.0     | Yes                            | No                                   | Mast Cell Tumor                        | NA                                | Localized/Regional                     | NA                                 | >5cm       | NA                      | NA                                      | NA                                                 | NA                                             | NA                     | Negative             | No                                         |
| 0951    | No       | NA                               | Yes          | No          | 10.33 | Male   | Yes          | 14.93       | Purebred                | Beagle                         | 2.5       | 2.0     | Yes                            | No                                   | Urinary Bladder/Urethra                | NA                                | Undetermined                           | NA                                 | <=5cm      | NA                      | NA                                      | NA                                                 | NA                                             | NA                     | Positive             | No                                         |
| 0952    | No       | NA                               | Yes          | No          | 9.75  | Male   | Yes          | 81.67       | Mixed-breed             | NA                             | 3.0       | 2.0     | Yes                            | No                                   | Lymphoma, Intermediate to Large Cell   | B-cell                            | NA                                     | Disseminated/ Metastatic           | >5cm       | NA                      | NA                                      | NA                                                 | NA                                             | NA                     | Positive             | Yes                                        |
| 0953    | No       | NA                               | No           | Yes         | 8.00  | Female | Yes          | 56.32       | Purebred                | Great Dane                     | 3.0       | 2.0     | Yes                            | No                                   | Bone, Osteosarcoma                     | NA                                | Localized/Regional                     | NA                                 | <=5cm      | NA                      | NA                                      | NA                                                 | NA                                             | NA                     | Negative             | No                                         |
| 0954    | No       | NA                               | No           | Yes         | 11.00 | Female | Yes          | 36.68       | Mixed-breed             | NA                             | 3.0       | 1.0     | Yes                            | No                                   | Multiple Myeloma                       | NA                                | Disseminated/Metastatic                | NA                                 | <=5cm      | NA                      | NA                                      | NA                                                 | NA                                             | NA                     | Negative             | No                                         |
| 0955    | No       | NA                               | No           | Yes         | 11.17 | Male   | Yes          | 9.42        | Purebred                | West Highland White Terrier    | 4.0       | 2.0     | Yes                            | No                                   | Skin                                   | NA                                | Disseminated/Metastatic                | NA                                 | <=5cm      | NA                      | NA                                      | NA                                                 | NA                                             | NA                     | Negative             | No                                         |
| 0956    | No       | NA                               | No           | Yes         | 14.83 | Female | Yes          | 15.83       | Purebred                | Border Collie                  | 3.0       | 2.0     | Yes                            | No                                   | Urinary Bladder/Urethra                | NA                                | Localized/Regional                     | NA                                 | <=5cm      | NA                      | NA                                      | NA                                                 | NA                                             | NA                     | Negative             | No                                         |
| 0957    | No       | NA                               | No           | Yes         | 11.00 | Male   | Yes          | 33.17       | Purebred                | Labrador Retriever             | 3.5       | 2.0     | Yes                            | No                                   | Multiple Myeloma                       | NA                                | Undetermined                           | NA                                 | NA         | NA                      | NA                                      | NA                                                 | NA                                             | NA                     | Negative             | No                                         |
| 0958    | No       | NA                               | No           | Yes         | 5.00  | Male   | Yes          | 57.62       | Purebred                | German Shepherd                | NA        | 1.0     | Yes                            | No                                   | Bone, Osteosarcoma                     | NA                                | Localized/Regional                     | NA                                 | >5cm       | NA                      | NA                                      | NA                                                 | NA                                             | NA                     | Positive             | No                                         |
| 0959    | No       | NA                               | Yes          | No          | 6.00  | Male   | Yes          | 48.30       | Mixed-breed             | NA                             | 3.0       | 1.0     | Yes                            | No                                   | Lymphoma, Intermediate to Large Cell   | B-cell                            | NA                                     | Disseminated/ Metastatic           | <=5cm      | NA                      | NA                                      | NA                                                 | NA                                             | NA                     | Positive             | Yes                                        |
| 0960    | No       | NA                               | Yes          | No          | 7.67  | Male   | Yes          | 30.36       | Purebred                | Golden Retriever               | 2.0       | 1.0     | Yes                            | No                                   | Prostate                               | NA                                | Localized/Regional                     | NA                                 | <=5cm      | NA                      | NA                                      | NA                                                 | NA                                             | NA                     | Negative             | No                                         |
| 0961    | No       | NA                               | No           | Yes         | 12.92 | Female | Yes          | 16.43       | Purebred                | Pembroke Welsh Corgi           | 3.0       | 2.0     | Yes                            | No                                   | Lymphoma, Intermediate to Large Cell   | B-cell                            | NA                                     | Disseminated/ Metastatic           | <=5cm      | NA                      | NA                                      | NA                                                 | NA                                             | NA                     | Negative             | No                                         |
| 0962    | No       | NA                               | No           | Yes         | 7.25  | Female | Yes          | 30.16       | Mixed-breed             | NA                             | 3.5       | 2.0     | Yes                            | No                                   | Lymphoma, Intermediate to Large Cell   | B-cell                            | NA                                     | Disseminated/ Metastatic           | <=5cm      | NA                      | NA                                      | NA                                                 | NA                                             | NA                     | Positive             | Yes                                        |
| 0963    | No       | NA                               | No           | Yes         | 11.00 | Male   | Yes          | 32.27       | Mixed-breed             | NA                             | 3.5       | 1.0     | Yes                            | No                                   | Lymphoma, Intermediate to Large Cell   | B-cell                            | NA                                     | Disseminated/ Metastatic           | <=5cm      | NA                      | NA                                      | NA                                                 | NA                                             | NA                     | Positive             | No                                         |
| 0964    | No       | NA                               | No           | Yes         | 5.75  | Male   | Yes          | 43.09       | Purebred                | Golden Retriever               | 3.5       | 2.0     | Yes                            | No                                   | Lymphoma, Indolent                     | T ZONE                            | NA                                     | Disseminated/ Metastatic           | <=5cm      | NA                      | NA                                      | NA                                                 | NA                                             | NA                     | Positive             | No                                         |
| 0965    | No       | NA                               | No           | Yes         | 7.67  | Female | Yes          | 29.06       | Purebred                | Golden Retriever               | 2.0       | 0.0     | Yes                            | No                                   | Histiocytic Sarcoma                    | NA                                | Localized/Regional                     | NA                                 | <=5cm      | NA                      | NA                                      | NA                                                 | NA                                             | NA                     | Positive             | Yes                                        |
| 0966    | No       | NA                               | No           | Yes         | 5.33  | Female | Yes          | 37.48       | Mixed-breed             | NA                             | 3.5       | 2.0     | Yes                            | No                                   | Soft Tissue Sarcoma                    | NA                                | Localized/Regional                     | NA                                 | <=5cm      | NA                      | NA                                      | NA                                                 | NA                                             | NA                     | Negative             | No                                         |
| 0967    | Yes      | Enrollment or Clinical Deviation | No           | No          | 11.33 | Male   | Yes          | 24.55       | Purebred                | Vizslas                        | 2.0       | 2.0     | Yes                            | No                                   | NA                                     | NA                                | NA                                     | NA                                 | NA         | NA                      | NA                                      | NA                                                 | NA                                             | NA                     | Negative             | No                                         |
| 0968    | No       | NA                               | No           | Yes         | 12.00 | Male   | Yes          | 11.82       | Purebred                | Boston Terrier                 | 3.0       | 2.0     | Yes                            | No                                   | Hemangiosarcoma                        | NA                                | Disseminated/Metastatic                | NA                                 | <=5cm      | NA                      | NA                                      | NA                                                 | NA                                             | NA                     | Negative             | No                                         |
| 0969    | No       | NA                               | No           | Yes         | 7.58  | Female | No           | 32.07       | Purebred                | Siberian Husky                 | 4.0       | 2.0     | Yes                            | No                                   | Lymphoma, Intermediate to Large Cell   | B-cell                            | NA                                     | Disseminated/ Metastatic           | >5cm       | NA                      | NA                                      | NA                                                 | NA                                             | NA                     | Positive             | Yes                                        |
| 0970    | No       | NA                               | No           | Yes         | 10.00 | Male   | Yes          | 19.94       | Purebred                | Siberian Husky                 | 4.0       | 2.0     | Yes                            | No                                   | Lymphoma, Intermediate to Large Cell   | UNK                               | NA                                     | Disseminated/ Metastatic           | >5cm       | NA                      | NA                                      | NA                                                 | NA                                             | NA                     | Positive             | No                                         |
| 0971    | No       | NA                               | Yes          | No          | 9.08  | Female | Yes          | 26.35       | Purebred                | Collie                         | 4.0       | NA      | Yes                            | No                                   | Urinary Bladder/Urethra                | NA                                | Undetermined                           | NA                                 | >5cm       | NA                      | NA                                      | NA                                                 | NA                                             | NA                     | Negative             | No                                         |
| 0972    | No       | NA                               | Yes          | No          | 9.33  | Male   | Yes          | 36.58       | Purebred                | Labrador Retriever             | 1.0       | 0.0     | Yes                            | No                                   | Bone, Fibrosarcoma                     | NA                                | Localized/Regional                     | NA                                 | <=5cm      | NA                      | NA                                      | NA                                                 | NA                                             | NA                     | Negative             | No                                         |
| 0973    | No       | NA                               | Yes          | No          | 6.50  | Female | Yes          | 32.87       | Purebred                | Labrador Retriever             | 3.5       | 2.0     | Yes                            | No                                   | Bone, Multilobular Osteochondrosarcoma | NA                                | Localized/Regional                     | NA                                 | >5cm       | NA                      | NA                                      | NA                                                 | NA                                             | NA                     | Negative             | No                                         |
| 0974    | No       | NA                               | No           | Yes         | 12.00 | Female | No           | 22.15       | Purebred                | Siberian Husky                 | 2.0       | 0.0     | Yes                            | No                                   | Lung                                   | NA                                | Localized/Regional                     | NA                                 | UNK        | NA                      | NA                                      | NA                                                 | NA                                             | NA                     | Negative             | No                                         |
| 0975    | No       | NA                               | No           | Yes         | 11.25 | Female | Yes          | 27.06       | Purebred                | Labrador Retriever             | 2.5       | 1.5     | Yes                            | No                                   | Nasal Cavity and Paranasal Sinuses     | NA                                | Localized/Regional                     | NA                                 | >5cm       | NA                      | NA                                      | NA                                                 | NA                                             | NA                     | Positive             | No                                         |
| 0976    | No       | NA                               | No           | Yes         | 9.00  | Female | Yes          | 50.10       | Purebred                | Golden Retriever               | 4.0       | 2.0     | Yes                            | No                                   | Soft Tissue Sarcoma                    | NA                                | Undetermined                           | NA                                 | >5cm       | NA                      | NA                                      | NA                                                 | NA                                             | NA                     | Positive             | No                                         |
| 0977    | No       | NA                               | No           | Yes         | 9.58  | Female | Yes          | 33.57       | Purebred                | Labrador Retriever             | 2.0       | 0.0     | Yes                            | No                                   | Leukemia, Chronic Lymphoid (CLL)       | T-Cell                            | NA                                     | Disseminated/ Metastatic           | NA         | NA                      | NA                                      | NA                                                 | NA                                             | NA                     | Positive             | No                                         |
| 0978    | No       | NA                               | No           | Yes         | 6.92  | Male   | No           | 37.78       | Purebred                | Rottweiler                     | 3.0       | 1.0     | Yes                            | No                                   | Lymphoma, Intermediate to Large Cell   | UNK                               | NA                                     | Disseminated/ Metastatic           | <=5cm      | NA                      | NA                                      | NA                                                 | NA                                             | NA                     | Positive             | Yes                                        |
| 0979    | No       | NA                               | No           | Yes         | 12.58 | Male   | Yes          | 33.57       | Purebred                | Golden Retriever               | 1.0       | 0.0     | Yes                            | No                                   | Lymphoma, Intermediate to Large Cell   | B-cell                            | NA                                     | Disseminated/ Metastatic           | >5cm       | Lymphoma, Indolent      | T ZONE                                  | NA                                                 | Disseminated/ Metastatic                       | >5cm                   | Positive             | Yes                                        |
| 0980    | No       | NA                               | Yes          | No          | 11.83 | Female | Yes          | 14.83       | Purebred                | Beagle                         | 4.0       | 2.0     | Yes                            | No                                   | Thyroid                                | NA                                | Disseminated/Metastatic                | NA                                 | <=5cm      | NA                      | NA                                      | NA                                                 | NA                                             | NA                     | Positive             | No                                         |
| 0981    | Yes      | Test failure                     | No           | No          | 7.08  | Male   | Yes          | 32.07       | Mixed-breed             | NA                             | 2.0       | NA      | Yes                            | No                                   | NA                                     | NA                                | NA                                     | NA                                 | NA         | NA                      | NA                                      | NA                                                 | NA                                             | NA                     | Negative             | No                                         |
| 0982    | No       | NA                               | No           | Yes         | 15.00 | Male   | Yes          | 25.35       | Mixed-breed             | NA                             | NA        | 1.5     | Yes                            | No                                   | Lymphoma, Intermediate to Large Cell   | B-cell                            | NA                                     | Disseminated/ Metastatic           | <=5cm      | NA                      | NA                                      | NA                                                 | NA                                             | NA                     | Positive             | Yes                                        |
| 0983    | No       | NA                               | Yes          | No          | 3.50  | Female | Yes          | 30.96       | Purebred                | German Shepherd                | 3.0       | 2.0     | Yes                            | No                                   | Lymphoma, Intermediate to Large Cell   | B-cell                            | NA                                     | Disseminated/ Metastatic           | <=5cm      | NA                      | NA                                      | NA                                                 | NA                                             | NA                     | Positive             | No                                         |
| 0984    | No       | NA                               | No           | Yes         | 10.67 | Female | Yes          | 35.07       | Mixed-breed             | NA                             | 2.5       | NA      | Yes                            | No                                   | Peripheral Nerve Sheath Tumor          | NA                                | Localized/Regional                     | NA                                 | <=5cm      | NA                      | NA                                      | NA                                                 | NA                                             | NA                     | Negative             | No                                         |

S1 Table. Full subject level data for subjects enrolled in the CANDiD study (continued)

See legend on last page.

| Subject | Excluded | Reason for Exclusion             | Training Set | Testing Set | Age   | Sex    | Spay/ Neuter | Weight (kg) | Purebred or Mixed Breed | Breed (Purebred)              | Hemolysis | Lipemia | Cancer Diagnosis at Enrollment | Cancer Diagnosed after Liquid Biopsy | Cancer Type                          | Immunophenotype (Lymphoid Cancer) | Extent of Disease: Non-Lymphoid Cancer | Extent of Disease: Lymphoid Cancer | Tumor Size | Cancer Type (Cancer #2)              | Immunophenotype (Cancer #2 if Lymphoid) | Extent of Disease: Non-Lymphoid Cancer (Cancer #2) | Extent of Disease: Lymphoid Cancer (Cancer #2) | Tumor Size (Cancer #2) | Liquid Biopsy Result | CSO Prediction of Hematological Malignancy |
|---------|----------|----------------------------------|--------------|-------------|-------|--------|--------------|-------------|-------------------------|-------------------------------|-----------|---------|--------------------------------|--------------------------------------|--------------------------------------|-----------------------------------|----------------------------------------|------------------------------------|------------|--------------------------------------|-----------------------------------------|----------------------------------------------------|------------------------------------------------|------------------------|----------------------|--------------------------------------------|
| 0985    | No       | NA                               | Yes          | No          | 12.42 | Female | Yes          | 36.78       | Purebred                | Labrador Retriever            | 3.0       | 2.0     | Yes                            | No                                   | Anal Sac                             | NA                                | Localized/Regional                     | NA                                 | <=5cm      | NA                                   | NA                                      | NA                                                 | NA                                             | NA                     | Negative             | No                                         |
| 0986    | No       | NA                               | No           | Yes         | 12.50 | Male   | Yes          | 15.73       | Mixed-breed             | NA                            | 3.0       | 2.0     | Yes                            | No                                   | Lung                                 | NA                                | Localized/Regional                     | NA                                 | >5cm       | NA                                   | NA                                      | NA                                                 | NA                                             | NA                     | Positive             | No                                         |
| 0987    | No       | NA                               | No           | Yes         | 11.92 | Male   | Yes          | 26.25       | Purebred                | Australian Shepherd           | 3.0       | 2.0     | Yes                            | No                                   | Lymphoma, Intermediate to Large Cell | B-cell                            | NA                                     | Disseminated/ Metastatic           | UNK        | NA                                   | NA                                      | NA                                                 | NA                                             | NA                     | Positive             | Yes                                        |
| 0988    | No       | NA                               | No           | Yes         | 9.00  | Male   | No           | 37.08       | Purebred                | Golden Retriever              | NA        | 0.0     | Yes                            | No                                   | Lymphoma, Indolent                   | T ZONE                            | NA                                     | Localized/ Regional                | >5cm       | NA                                   | NA                                      | NA                                                 | NA                                             | NA                     | Positive             | No                                         |
| 0989    | No       | NA                               | No           | Yes         | 11.58 | Male   | Yes          | 21.95       | Purebred                | Australian Shepherd           | 2.0       | 2.0     | Yes                            | No                                   | Lymphoma, Intermediate to Large Cell | T-Cell                            | NA                                     | Disseminated/ Metastatic           | <=5cm      | NA                                   | NA                                      | NA                                                 | NA                                             | NA                     | Positive             | No                                         |
| 0990    | No       | NA                               | No           | Yes         | 8.42  | Male   | Yes          | 40.08       | Mixed-breed             | NA                            | 2.0       | 2.0     | Yes                            | No                                   | Thyroid                              | NA                                | Disseminated/Metastatic                | NA                                 | >5cm       | NA                                   | NA                                      | NA                                                 | NA                                             | NA                     | Positive             | No                                         |
| 0991    | No       | NA                               | No           | Yes         | 7.75  | Male   | Yes          | 39.48       | Mixed-breed             | NA                            | 2.5       | 2.0     | Yes                            | No                                   | Lymphoma, Intermediate to Large Cell | B-cell                            | NA                                     | Disseminated/ Metastatic           | >5cm       | NA                                   | NA                                      | NA                                                 | NA                                             | NA                     | Positive             | Yes                                        |
| 0992    | No       | NA                               | No           | Yes         | 10.42 | Female | Yes          | 25.85       | Mixed-breed             | NA                            | 3.0       | 2.0     | Yes                            | No                                   | Lymphoma, Intermediate to Large Cell | B-cell                            | NA                                     | Disseminated/ Metastatic           | <=5cm      | NA                                   | NA                                      | NA                                                 | NA                                             | NA                     | Positive             | No                                         |
| 0993    | No       | NA                               | Yes          | No          | 7.25  | Male   | Yes          | 13.53       | Purebred                | Cavalier King Charles Spaniel | 3.0       | 2.0     | Yes                            | No                                   | Lymphoma, Indolent                   | T ZONE                            | NA                                     | Localized/ Regional                | <=5cm      | NA                                   | NA                                      | NA                                                 | NA                                             | NA                     | Negative             | No                                         |
| 0994    | No       | NA                               | No           | Yes         | 5.00  | Male   | No           | 62.43       | Purebred                | Cane Corso                    | 2.5       | 2.0     | Yes                            | No                                   | Lymphoma, Intermediate to Large Cell | UNK                               | NA                                     | Disseminated/ Metastatic           | >5cm       | NA                                   | NA                                      | NA                                                 | NA                                             | NA                     | Positive             | No                                         |
| 0995    | Yes      | Laboratory Workflow Deviation    | No           | No          | 9.67  | Male   | Yes          | 7.42        | Mixed-breed             | NA                            | 2.0       | 1.0     | Yes                            | No                                   | NA                                   | NA                                | NA                                     | NA                                 | NA         | NA                                   | NA                                      | NA                                                 | NA                                             | NA                     | Positive             | No                                         |
| 0996    | No       | NA                               | No           | Yes         | 4.67  | Male   | Yes          | 15.93       | Mixed-breed             | NA                            | 2.0       | 1.0     | Yes                            | No                                   | Lymphoma, Intermediate to Large Cell | B-cell                            | NA                                     | Disseminated/ Metastatic           | >5cm       | NA                                   | NA                                      | NA                                                 | NA                                             | NA                     | Positive             | No                                         |
| 0997    | Yes      | Laboratory Workflow Deviation    | No           | No          | 11.00 | Female | Yes          | 9.42        | Mixed-breed             | NA                            | 2.0       | 2.0     | Yes                            | No                                   | NA                                   | NA                                | NA                                     | NA                                 | NA         | NA                                   | NA                                      | NA                                                 | NA                                             | NA                     | Positive             | No                                         |
| 0998    | No       | NA                               | Yes          | No          | 5.00  | Female | Yes          | 27.76       | Mixed-breed             | NA                            | 4.0       | 2.0     | Yes                            | No                                   | Lymphoma, Intermediate to Large Cell | B-cell                            | NA                                     | Disseminated/ Metastatic           | >5cm       | NA                                   | NA                                      | NA                                                 | NA                                             | NA                     | Positive             | Yes                                        |
| 0999    | No       | NA                               | No           | Yes         | 11.50 | Female | Yes          | 38.58       | Purebred                | German Shepherd               | 4.0       | 2.0     | Yes                            | No                                   | Soft Tissue Sarcoma                  | NA                                | Disseminated/Metastatic                | NA                                 | <=5cm      | NA                                   | NA                                      | NA                                                 | NA                                             | NA                     | Positive             | No                                         |
| 1000    | Yes      | Laboratory Workflow Deviation    | No           | No          | 9.75  | Female | UNK          | 32.07       | Purebred                | Golden Retriever              | 4.0       | 2.0     | Yes                            | No                                   | Lymphoma, Indolent                   | T ZONE                            | NA                                     | Disseminated/ Metastatic           | <=5cm      | NA                                   | NA                                      | NA                                                 | NA                                             | NA                     | Negative             | No                                         |
| 1001    | No       | NA                               | No           | Yes         | 3.67  | Male   | Yes          | 37.08       | Purebred                | Golden Retriever              | 1.0       | 0.0     | Yes                            | No                                   | Lymphoma, Intermediate to Large Cell | B-cell                            | NA                                     | Localized/ Regional                | >5cm       | NA                                   | NA                                      | NA                                                 | NA                                             | NA                     | Positive             | Yes                                        |
| 1002    | Yes      | Laboratory Workflow Deviation    | No           | No          | 10.17 | Female | Yes          | 7.42        | Mixed-breed             | NA                            | 2.0       | 2.0     | Yes                            | No                                   | NA                                   | NA                                | NA                                     | NA                                 | NA         | NA                                   | NA                                      | NA                                                 | NA                                             | NA                     | Negative             | No                                         |
| 1003    | No       | NA                               | No           | Yes         | 12.42 | Female | Yes          | 23.05       | Mixed-breed             | NA                            | 3.5       | 2.0     | Yes                            | No                                   | Lymphoma, Intermediate to Large Cell | NA                                | NA                                     | Disseminated/ Metastatic           | <=5cm      | NA                                   | NA                                      | NA                                                 | NA                                             | NA                     | Positive             | No                                         |
| 1004    | No       | NA                               | No           | Yes         | 12.00 | Female | Yes          | 20.04       | Mixed-breed             | NA                            | 3.0       | 0.0     | Yes                            | No                                   | Histiocytic Sarcoma                  | NA                                | Localized/Regional                     | NA                                 | <=5cm      | NA                                   | NA                                      | NA                                                 | NA                                             | NA                     | Negative             | No                                         |
| 1005    | No       | NA                               | No           | Yes         | 9.00  | Male   | Yes          | 27.86       | Purebred                | Basset Hound                  | 4.0       | 2.0     | Yes                            | No                                   | Lymphoma, Intermediate to Large Cell | T-Cell                            | NA                                     | Disseminated/ Metastatic           | <=5cm      | NA                                   | NA                                      | NA                                                 | NA                                             | NA                     | Positive             | No                                         |
| 1006    | No       | NA                               | No           | Yes         | 3.00  | Male   | Yes          | 23.75       | Mixed-breed             | NA                            | 2.0       | 2.0     | Yes                            | No                                   | Lymphoma, Intermediate to Large Cell | B-cell                            | NA                                     | Disseminated/ Metastatic           | <=5cm      | NA                                   | NA                                      | NA                                                 | NA                                             | NA                     | Positive             | No                                         |
| 1007    | No       | NA                               | No           | Yes         | 4.83  | Male   | Yes          | 18.74       | Purebred                | Staffordshire Bull Terrier    | 2.0       | 2.0     | Yes                            | No                                   | Lymphoma, Intermediate to Large Cell | B-cell                            | NA                                     | Disseminated/ Metastatic           | >5cm       | NA                                   | NA                                      | NA                                                 | NA                                             | NA                     | Positive             | No                                         |
| 1008    | No       | NA                               | No           | Yes         | 2.92  | Male   | No           | 13.53       | Purebred                | French Bulldog                | 3.5       | 2.0     | Yes                            | No                                   | Lymphoma, Intermediate to Large Cell | B-cell                            | NA                                     | Disseminated/ Metastatic           | <=5cm      | NA                                   | NA                                      | NA                                                 | NA                                             | NA                     | Positive             | Yes                                        |
| 1009    | No       | NA                               | No           | Yes         | 10.50 | Female | Yes          | 52.61       | Mixed-breed             | NA                            | 3.0       | 1.0     | Yes                            | No                                   | Mast Cell Tumor                      | NA                                | Localized/Regional                     | NA                                 | <=5cm      | NA                                   | NA                                      | NA                                                 | NA                                             | NA                     | Negative             | No                                         |
| 1010    | No       | NA                               | No           | Yes         | 14.50 | Female | Yes          | 21.44       | Purebred                | Australian Cattle Dog         | 2.0       | 0.0     | Yes                            | No                                   | Lymphoma, Intermediate to Large Cell | B-cell                            | NA                                     | Disseminated/ Metastatic           | >5cm       | NA                                   | NA                                      | NA                                                 | NA                                             | NA                     | Positive             | Yes                                        |
| 1011    | Yes      | Laboratory Workflow Deviation    | No           | No          | 9.17  | Male   | Yes          | 8.42        | Mixed-breed             | NA                            | 3.0       | 1.0     | Yes                            | No                                   | NA                                   | NA                                | NA                                     | NA                                 | NA         | NA                                   | NA                                      | NA                                                 | NA                                             | NA                     | Positive             | Yes                                        |
| 1012    | No       | NA                               | No           | Yes         | 5.00  | Male   | Yes          | 16.94       | Purebred                | French Bulldog                | 2.0       | 0.0     | Yes                            | No                                   | Lymphoma, Intermediate to Large Cell | B-cell                            | NA                                     | Disseminated/ Metastatic           | <=5cm      | NA                                   | NA                                      | NA                                                 | NA                                             | NA                     | Positive             | No                                         |
| 1013    | Yes      | Laboratory Workflow Deviation    | No           | No          | 12.92 | Male   | Yes          | 5.51        | Purebred                | Maltese                       | 0.0       | 1.0     | Yes                            | No                                   | NA                                   | NA                                | NA                                     | NA                                 | NA         | NA                                   | NA                                      | NA                                                 | NA                                             | NA                     | Fail                 | No                                         |
| 1014    | No       | NA                               | No           | Yes         | 14.17 | Female | Yes          | 25.85       | Mixed-breed             | NA                            | 1.0       | 1.0     | Yes                            | No                                   | Urinary Bladder/Urethra              | NA                                | Localized/Regional                     | NA                                 | <=5cm      | Lymphoma, Intermediate to Large Cell | B-cell                                  | NA                                                 | Disseminated/ Metastatic                       | <=5cm                  | Positive             | Yes                                        |
| 1015    | No       | NA                               | No           | Yes         | 7.08  | Male   | Yes          | 30.06       | Mixed-breed             | NA                            | 2.5       | 0.5     | Yes                            | No                                   | Transmissible Venereal Tumor         | NA                                | Localized/Regional                     | NA                                 | >5cm       | NA                                   | NA                                      | NA                                                 | NA                                             | NA                     | Positive             | No                                         |
| 1016    | Yes      | Enrollment or Clinical Deviation | No           | No          | 7.25  | Male   | Yes          | 10.22       | Purebred                | Cavalier King Charles Spaniel | 1.0       | 0.0     | Yes                            | No                                   | NA                                   | NA                                | NA                                     | NA                                 | NA         | NA                                   | NA                                      | NA                                                 | NA                                             | NA                     | Positive             | No                                         |
| 1017    | No       | NA                               | No           | Yes         | 5.50  | Female | Yes          | 16.43       | Mixed-breed             | NA                            | 4.0       | 1.0     | Yes                            | No                                   | Lymphoma, Intermediate to Large Cell | T-Cell                            | NA                                     | Disseminated/ Metastatic           | <=5cm      | NA                                   | NA                                      | NA                                                 | NA                                             | NA                     | Negative             | No                                         |
| 1018    | No       | NA                               | Yes          | No          | 7.42  | Male   | Yes          | 33.27       | Mixed-breed             | NA                            | 3.5       | 2.0     | Yes                            | No                                   | Mast Cell Tumor                      | NA                                | Localized/Regional                     | NA                                 | <=5cm      | NA                                   | NA                                      | NA                                                 | NA                                             | NA                     | Negative             | No                                         |
| 1019    | No       | NA                               | Yes          | No          | 4.42  | Male   | Yes          | 24.35       | Purebred                | English Bulldog               | 3.0       | 2.0     | Yes                            | No                                   | Lymphoma, Intermediate to Large Cell | B-cell                            | NA                                     | Disseminated/ Metastatic           | >5cm       | NA                                   | NA                                      | NA                                                 | NA                                             | NA                     | Positive             | Yes                                        |
| 1020    | No       | NA                               | No           | Yes         | 8.33  | Female | Yes          | 16.03       | Mixed-breed             | NA                            | 4.0       | 2.0     | Yes                            | No                                   | Oral Cavity                          | NA                                | Localized/Regional                     | NA                                 | >5cm       | NA                                   | NA                                      | NA                                                 | NA                                             | NA                     | Negative             | No                                         |
| 1021    | No       | NA                               | No           | Yes         | 9.17  | Female | Yes          | 58.12       | Purebred                | Great Dane                    | 2.0       | 1.0     | Yes                            | No                                   | Bone, Osteosarcoma                   | NA                                | Disseminated/Metastatic                | NA                                 | <=5cm      | NA                                   | NA                                      | NA                                                 | NA                                             | NA                     | Negative             | No                                         |
| 1022    | No       | NA                               | No           | Yes         | 7.92  | Female | Yes          | 30.96       | Mixed-breed             | NA                            | 2.0       | 1.0     | Yes                            | No                                   | Bone, Osteosarcoma                   | NA                                | Localized/Regional                     | NA                                 | <=5cm      | NA                                   | NA                                      | NA                                                 | NA                                             | NA                     | Negative             | No                                         |
| 1023    | Yes      | Enrollment or Clinical Deviation | No           | No          | 9.50  | Male   | Yes          | 49.40       | Purebred                | Golden Retriever              | 2.0       | 1.0     | Yes                            | No                                   | NA                                   | NA                                | NA                                     | NA                                 | NA         | NA                                   | NA                                      | NA                                                 | NA                                             | NA                     | Positive             | No                                         |
| 1024    | No       | NA                               | No           | Yes         | 11.00 | Male   | Yes          | 23.55       | Mixed-breed             | NA                            | 3.5       | 2.0     | Yes                            | No                                   | Malignant Melanoma                   | NA                                | Localized/Regional                     | NA                                 | <=5cm      | NA                                   | NA                                      | NA                                                 | NA                                             | NA                     | Positive             | No                                         |
| 1025    | No       | NA                               | No           | Yes         | 7.25  | Male   | Yes          | 32.07       | Purebred                | Boxer                         | 4.0       | 2.0     | Yes                            | No                                   | Lymphoma, Intermediate to Large Cell | T-Cell                            | NA                                     | Disseminated/ Metastatic           | <=5cm      | NA                                   | NA                                      | NA                                                 | NA                                             | NA                     | Positive             | No                                         |
| 1026    | No       | NA                               | No           | Yes         | 11.83 | Male   | No           | 34.07       | Purebred                | Golden Retriever              | 3.5       | 2.0     | Yes                            | No                                   | Lymphoma, Intermediate to Large Cell | UNK                               | NA                                     | Disseminated/ Metastatic           | >5cm       | NA                                   | NA                                      | NA                                                 | NA                                             | NA                     | Positive             | Yes                                        |
| 1027    | No       | NA                               | Yes          | No          | 10.17 | Male   | Yes          | 10.02       | Purebred                | French Bulldog                | 1.0       | 2.0     | Yes                            | No                                   | Bone, Osteosarcoma                   | NA                                | Disseminated/Metastatic                | NA                                 | <=5cm      | NA                                   | NA                                      | NA                                                 | NA                                             | NA                     | Positive             | No                                         |
| 1028    | No       | NA                               | No           | Yes         | 10.17 | Female | Yes          | 23.65       | Purebred                | English Bulldog               | 1.0       | 1.0     | Yes                            | No                                   | Lymphoma, Intermediate to Large Cell | UNK                               | NA                                     | Disseminated/ Metastatic           | >5cm       | NA                                   | NA                                      | NA                                                 | NA                                             | NA                     | Positive             | Yes                                        |
| 1029    | No       | NA                               | Yes          | No          | 5.00  | Female | Yes          | 20.04       | Mixed-breed             | NA                            | 4.0       | 2.0     | Yes                            | No                                   | Lymphoma, Intermediate to Large Cell | B-cell                            | NA                                     | Disseminated/ Metastatic           | >5cm       | NA                                   | NA                                      | NA                                                 | NA                                             | NA                     | Positive             | No                                         |
| 1030    | No       | NA                               | No           | Yes         | 7.00  | Male   | Yes          | 52.11       | Purebred                | Rottweiler                    | 1.0       | 2.0     | Yes                            | No                                   | Malignant Melanoma                   | NA                                | Disseminated/Metastatic                | NA                                 | >5cm       | NA                                   | NA                                      | NA                                                 | NA                                             | NA                     | Positive             | No                                         |
| 1031    | No       | NA                               | No           | Yes         | 7.00  | Male   | No           | 35.27       | Purebred                | Labrador Retriever            | 4.0       | 2.0     | Yes                            | No                                   | Lymphoma, Intermediate to Large Cell | B-cell                            | NA                                     | Disseminated/ Metastatic           | <=5cm      | NA                                   | NA                                      | NA                                                 | NA                                             | NA                     | Positive             | No                                         |
| 1032    | No       | NA                               | No           | Yes         | 8.67  | Male   | Yes          | 38.18       | Mixed-breed             | NA                            | 3.0       | 2.0     | Yes                            | No                                   | Lymphoma, Intermediate to Large Cell | T-Cell                            | NA                                     | Disseminated/ Metastatic           | >5cm       | NA                                   | NA                                      | NA                                                 | NA                                             | NA                     | Positive             | No                                         |
| 1033    | No       | NA                               | No           | Yes         | 13.42 | Female | Yes          | 43.09       | Purebred                | German Shepherd               | 1.0       | 0.0     | Yes                            | No                                   | Hemangiosarcoma                      | NA                                | Localized/Regional                     | NA                                 | >5cm       | Thyroid                              | NA                                      | Disseminated/ Metastatic                           | NA                                             | >5cm                   | Positive             | No                                         |
| 1034    | Yes      | Laboratory Workflow Deviation    | No           | No          | 12.58 | Female | Yes          | 8.42        | Purebred                | Boston Terrier                | 2.0       | 0.5     | Yes                            | No                                   | NA                                   | NA                                | NA                                     | NA                                 | NA         | NA                                   | NA                                      | NA                                                 | NA                                             | NA                     | Negative             | No                                         |
| 1035    | No       | NA                               | Yes          | No          | 10.00 | Female | No           | 14.53       | Purebred                | English Setter                | 1.0       | 2.0     | Yes                            | No                                   | Lymphoma, Intermediate to Large Cell | UNK                               | NA                                     | Disseminated/ Metastatic           | >5cm       | NA                                   | NA                                      | NA                                                 | NA                                             | NA                     | Positive             | No                                         |

S1 Table. Full subject level data for subjects enrolled in the CANDiD study (continued)

See legend on last page.

| Subject | Excluded | Reason for Exclusion             | Training Set | Testing Set | Age   | Sex    | Spay/ Neuter | Weight (kg) | Purebred or Mixed Breed | Breed (Purebred)               | Hemolysis | Lipemia | Cancer Diagnosis at Enrollment | Cancer Diagnosed after Liquid Biopsy | Cancer Type                            | Immunophenotype (Lymphoid Cancer) | Extent of Disease: Non-Lymphoid Cancer | Extent of Disease: Lymphoid Cancer | Tumor Size | Cancer Type (Cancer #2)          | Immunophenotype (Cancer #2 if Lymphoid) | Extent of Disease: Non-Lymphoid Cancer (Cancer #2) | Extent of Disease: Lymphoid Cancer (Cancer #2) | Tumor Size (Cancer #2) | Liquid Biopsy Result | CSO Prediction of Hematological Malignancy |
|---------|----------|----------------------------------|--------------|-------------|-------|--------|--------------|-------------|-------------------------|--------------------------------|-----------|---------|--------------------------------|--------------------------------------|----------------------------------------|-----------------------------------|----------------------------------------|------------------------------------|------------|----------------------------------|-----------------------------------------|----------------------------------------------------|------------------------------------------------|------------------------|----------------------|--------------------------------------------|
| 1036    | No       | NA                               | Yes          | No          | 4.58  | Female | No           | 11.82       | Purebred                | French Bulldog                 | 4.0       | NA      | Yes                            | No                                   | Lymphoma, Intermediate to Large Cell   | UNK                               | NA                                     | Disseminated/ Metastatic           | <=5cm      | NA                               | NA                                      | NA                                                 | NA                                             | NA                     | Positive             | No                                         |
| 1037    | No       | NA                               | No           | Yes         | 8.08  | Male   | Yes          | 26.56       | Mixed-breed             | NA                             | 2.0       | 2.0     | Yes                            | No                                   | Lymphoma, Intermediate to Large Cell   | B-cell                            | NA                                     | Disseminated/ Metastatic           | <=5cm      | NA                               | NA                                      | NA                                                 | NA                                             | NA                     | Positive             | No                                         |
| 1038    | No       | NA                               | No           | Yes         | 9.58  | Male   | Yes          | 39.58       | Purebred                | Golden Retriever               | 2.0       | 1.0     | Yes                            | No                                   | Nasal Cavity and Paranasal Sinuses     | NA                                | Localized/Regional                     | NA                                 | >5cm       | NA                               | NA                                      | NA                                                 | NA                                             | NA                     | Negative             | No                                         |
| 1039    | No       | NA                               | No           | Yes         | 5.50  | Male   | Yes          | 23.25       | Purebred                | Australian Shepherd            | 3.0       | 2.0     | Yes                            | No                                   | Lymphoma, Intermediate to Large Cell   | UNK                               | NA                                     | Disseminated/ Metastatic           | >5cm       | NA                               | NA                                      | NA                                                 | NA                                             | NA                     | Positive             | No                                         |
| 1040    | No       | NA                               | No           | Yes         | 9.83  | Female | Yes          | 23.05       | Purebred                | Basset Hound                   | 4.0       | 2.0     | Yes                            | No                                   | Nasal Cavity and Paranasal Sinuses     | NA                                | Localized/Regional                     | NA                                 | UNK        | NA                               | NA                                      | NA                                                 | NA                                             | NA                     | Negative             | No                                         |
| 1041    | No       | NA                               | No           | Yes         | 5.92  | Female | Yes          | 27.26       | Mixed-breed             | NA                             | 3.5       | 1.0     | Yes                            | No                                   | Lymphoma, Intermediate to Large Cell   | T-Cell                            | NA                                     | Disseminated/ Metastatic           | <=5cm      | NA                               | NA                                      | NA                                                 | NA                                             | NA                     | Positive             | No                                         |
| 1042    | Yes      | Enrollment or Clinical Deviation | No           | No          | 10.50 | Male   | No           | 32.07       | Purebred                | Labrador Retriever             | 1.0       | 2.0     | Yes                            | No                                   | NA                                     | NA                                | NA                                     | NA                                 | NA         | NA                               | NA                                      | NA                                                 | NA                                             | NA                     | Negative             | No                                         |
| 1043    | No       | NA                               | No           | Yes         | 15.08 | Female | Yes          | 19.84       | Mixed-breed             | NA                             | 2.0       | 2.0     | Yes                            | No                                   | Lymphoma, Intermediate to Large Cell   | B-cell                            | NA                                     | Disseminated/ Metastatic           | <=5cm      | NA                               | NA                                      | NA                                                 | NA                                             | NA                     | Positive             | Yes                                        |
| 1044    | No       | NA                               | No           | Yes         | 11.75 | Male   | Yes          | 43.39       | Mixed-breed             | NA                             | 2.0       | 2.0     | Yes                            | No                                   | Urinary Bladder/Urethra                | NA                                | Localized/Regional                     | NA                                 | <=5cm      | Hemangio-sarcoma                 | NA                                      | Localized/Regional                                 | NA                                             | >5cm                   | Positive             | No                                         |
| 1045    | No       | NA                               | No           | Yes         | 7.00  | Male   | Yes          | 37.08       | Purebred                | Golden Retriever               | 3.5       | 2.0     | Yes                            | No                                   | Lymphoma, Intermediate to Large Cell   | T-Cell                            | NA                                     | Localized/Re-gional                | <=5cm      | NA                               | NA                                      | NA                                                 | NA                                             | NA                     | Negative             | No                                         |
| 1046    | No       | NA                               | No           | Yes         | 4.00  | Male   | Yes          | 12.83       | Purebred                | Pembroke Welsh Corgi           | 3.0       | 1.0     | Yes                            | No                                   | Lymphoma, Intermediate to Large Cell   | B-cell                            | NA                                     | Disseminated/ Metastatic           | <=5cm      | NA                               | NA                                      | NA                                                 | NA                                             | NA                     | Positive             | Yes                                        |
| 1047    | No       | NA                               | No           | Yes         | 11.92 | Female | Yes          | 27.06       | Mixed-breed             | NA                             | 3.0       | NA      | Yes                            | No                                   | Lymphoma, Intermediate to Large Cell   | B-cell                            | NA                                     | Disseminated/ Metastatic           | <=5cm      | NA                               | NA                                      | NA                                                 | NA                                             | NA                     | Positive             | No                                         |
| 1048    | Yes      | Laboratory Workflow Deviation    | No           | No          | 12.83 | Male   | Yes          | 33.67       | Purebred                | American Staffordshire Terrier | 3.5       | 2.0     | Yes                            | No                                   | Lymphoma, Indolent                     | T ZONE                            | NA                                     | Disseminated/ Metastatic           | <=5cm      | NA                               | NA                                      | NA                                                 | NA                                             | NA                     | Negative             | No                                         |
| 1049    | No       | NA                               | No           | Yes         | 13.00 | Male   | No           | 23.15       | Mixed-breed             | NA                             | 2.0       | 1.0     | Yes                            | No                                   | Pituitary                              | NA                                | Localized/Regional                     | NA                                 | <=5cm      | NA                               | NA                                      | NA                                                 | NA                                             | NA                     | Negative             | No                                         |
| 1050    | No       | NA                               | No           | Yes         | 10.00 | Male   | Yes          | 34.09       | Mixed-breed             | NA                             | 4.0       | 2.0     | Yes                            | No                                   | Bone, Osteosarcoma                     | NA                                | Disseminated/Metastatic                | NA                                 | >5cm       | NA                               | NA                                      | NA                                                 | NA                                             | NA                     | Positive             | No                                         |
| 1051    | No       | NA                               | No           | Yes         | 12.00 | Female | Yes          | 25.55       | Mixed-breed             | NA                             | 2.0       | 0.0     | Yes                            | No                                   | Skin                                   | NA                                | Disseminated/Metastatic                | NA                                 | <=5cm      | NA                               | NA                                      | NA                                                 | NA                                             | NA                     | Positive             | No                                         |
| 1052    | No       | NA                               | No           | Yes         | 7.50  | Female | Yes          | 19.34       | Purebred                | Airedale Terrier               | 3.0       | 1.0     | Yes                            | No                                   | Lymphoma, Intermediate to Large Cell   | B-cell                            | NA                                     | Disseminated/ Metastatic           | <=5cm      | NA                               | NA                                      | NA                                                 | NA                                             | NA                     | Positive             | Yes                                        |
| 1053    | No       | NA                               | No           | Yes         | 12.17 | Female | Yes          | 10.02       | Purebred                | Pembroke Welsh Corgi           | 1.5       | 2.0     | Yes                            | No                                   | Lymphoma, Intermediate to Large Cell   | UNK                               | NA                                     | Disseminated/ Metastatic           | >5cm       | NA                               | NA                                      | NA                                                 | NA                                             | NA                     | Negative             | No                                         |
| 1054    | No       | NA                               | No           | Yes         | 5.92  | Female | Yes          | 27.06       | Purebred                | English Bulldog                | 2.0       | 1.0     | Yes                            | No                                   | Lymphoma, Intermediate to Large Cell   | T-Cell                            | NA                                     | Disseminated/ Metastatic           | >5cm       | NA                               | NA                                      | NA                                                 | NA                                             | NA                     | Positive             | No                                         |
| 1055    | No       | NA                               | No           | Yes         | 11.00 | Male   | Yes          | 30.76       | Mixed-breed             | NA                             | 2.5       | 2.0     | Yes                            | No                                   | Soft Tissue Sarcoma                    | NA                                | Localized/Regional                     | NA                                 | >5cm       | NA                               | NA                                      | NA                                                 | NA                                             | NA                     | Negative             | No                                         |
| 1056    | Yes      | Laboratory Workflow Deviation    | No           | No          | 6.33  | Female | Yes          | 24.15       | Mixed-breed             | NA                             | 4.0       | 2.0     | Yes                            | No                                   | Mast Cell Tumor                        | NA                                | Localized/Regional                     | NA                                 | <=5cm      | NA                               | NA                                      | NA                                                 | NA                                             | NA                     | Negative             | No                                         |
| 1057    | No       | NA                               | No           | Yes         | 8.00  | Female | Yes          | 36.58       | Mixed-breed             | NA                             | 2.0       | 2.0     | Yes                            | No                                   | Malignant Melanoma                     | NA                                | Localized/Regional                     | NA                                 | <=5cm      | NA                               | NA                                      | NA                                                 | NA                                             | NA                     | Negative             | No                                         |
| 1058    | No       | NA                               | Yes          | No          | 6.17  | Female | Yes          | 13.13       | Purebred                | Cardigan Welsh Corgi           | 2.0       | 2.0     | Yes                            | No                                   | Lymphoma, Intermediate to Large Cell   | T-Cell                            | NA                                     | Localized/ Regional                | >5cm       | NA                               | NA                                      | NA                                                 | NA                                             | NA                     | Positive             | No                                         |
| 1059    | Yes      | Laboratory Workflow Deviation    | No           | No          | 2.75  | Female | Yes          | 35.57       | Purebred                | Golden Retriever               | 3.0       | 2.0     | Yes                            | No                                   | NA                                     | NA                                | NA                                     | NA                                 | NA         | NA                               | NA                                      | NA                                                 | NA                                             | NA                     | Negative             | No                                         |
| 1060    | Yes      | Laboratory Workflow Deviation    | No           | No          | 4.33  | Female | Yes          | 32.07       | Purebred                | Labrador Retriever             | 4.0       | 2.0     | Yes                            | No                                   | Soft Tissue Sarcoma                    | NA                                | Localized/Regional                     | NA                                 | <=5cm      | NA                               | NA                                      | NA                                                 | NA                                             | NA                     | Positive             | No                                         |
| 1061    | No       | NA                               | Yes          | No          | 12.00 | Female | Yes          | 9.92        | Mixed-breed             | NA                             | 3.0       | 2.0     | Yes                            | No                                   | Anal Sac                               | NA                                | Disseminated/Metastatic                | NA                                 | <=5cm      | NA                               | NA                                      | NA                                                 | NA                                             | NA                     | Negative             | No                                         |
| 1062    | No       | NA                               | No           | Yes         | 2.58  | Male   | Yes          | 16.23       | Purebred                | Shetland Sheepdog              | 4.0       | 2.0     | Yes                            | No                                   | Lymphoma, Intermediate to Large Cell   | T-Cell                            | NA                                     | Localized/ Regional                | >5cm       | NA                               | NA                                      | NA                                                 | NA                                             | NA                     | Positive             | No                                         |
| 1063    | Yes      | Laboratory Workflow Deviation    | No           | No          | 6.58  | Male   | Yes          | 51.01       | Purebred                | Great Pyrenees                 | 3.0       | 2.0     | Yes                            | No                                   | NA                                     | NA                                | NA                                     | NA                                 | NA         | NA                               | NA                                      | NA                                                 | NA                                             | NA                     | Positive             | No                                         |
| 1064    | No       | NA                               | No           | Yes         | 8.42  | Female | Yes          | 9.62        | Mixed-breed             | NA                             | 3.0       | 2.0     | Yes                            | No                                   | Mast Cell Tumor                        | NA                                | Localized/Regional                     | NA                                 | <=5cm      | NA                               | NA                                      | NA                                                 | NA                                             | NA                     | Negative             | No                                         |
| 1065    | Yes      | Test failure                     | No           | No          | 7.00  | Male   | Yes          | 35.91       | Mixed-breed             | NA                             | NA        | 2.0     | Yes                            | No                                   | Mast Cell Tumor                        | NA                                | Localized/Regional                     | NA                                 | <=5cm      | NA                               | NA                                      | NA                                                 | NA                                             | NA                     | Negative             | No                                         |
| 1066    | Yes      | Enrollment or Clinical Deviation | No           | No          | 6.00  | Male   | Yes          | 30.86       | Purebred                | Labrador Retriever             | 0.0       | 1.0     | Yes                            | No                                   | NA                                     | NA                                | NA                                     | NA                                 | NA         | NA                               | NA                                      | NA                                                 | NA                                             | NA                     | Negative             | No                                         |
| 1067    | Yes      | Laboratory Workflow Deviation    | No           | No          | 12.58 | Female | Yes          | 16.94       | Purebred                | Australian Shepherd            | 2.0       | 2.0     | Yes                            | No                                   | NA                                     | NA                                | NA                                     | NA                                 | NA         | NA                               | NA                                      | NA                                                 | NA                                             | NA                     | Positive             | No                                         |
| 1068    | Yes      | Enrollment or Clinical Deviation | No           | No          | 9.00  | Male   | Yes          | 34.87       | Purebred                | Golden Retriever               | 0.0       | 2.0     | Yes                            | No                                   | NA                                     | NA                                | NA                                     | NA                                 | NA         | NA                               | NA                                      | NA                                                 | NA                                             | NA                     | Negative             | No                                         |
| 1069    | No       | NA                               | No           | Yes         | 9.92  | Male   | Yes          | 11.82       | Purebred                | Shih Tzu                       | 3.0       | 1.0     | Yes                            | No                                   | Mast Cell Tumor                        | NA                                | Localized/Regional                     | NA                                 | <=5cm      | Leukemia, Chronic Lymphoid (CLL) | B-cell                                  | NA                                                 | Undetermined                                   | NA                     | Positive             | Yes                                        |
| 1070    | No       | NA                               | No           | Yes         | 8.58  | Male   | Yes          | 30.56       | Mixed-breed             | NA                             | 4.0       | 2.0     | Yes                            | No                                   | Anal Sac                               | NA                                | Localized/Regional                     | NA                                 | <=5cm      | NA                               | NA                                      | NA                                                 | NA                                             | NA                     | Negative             | No                                         |
| 1071    | No       | NA                               | No           | Yes         | 8.92  | Male   | Yes          | 32.07       | Mixed-breed             | NA                             | NA        | 1.0     | Yes                            | No                                   | Oral Cavity                            | NA                                | Localized/Regional                     | NA                                 | >5cm       | NA                               | NA                                      | NA                                                 | NA                                             | NA                     | Positive             | No                                         |
| 1072    | No       | NA                               | No           | Yes         | 8.83  | Male   | Yes          | 44.39       | Purebred                | Dogo Argentino                 | 3.0       | 2.0     | Yes                            | No                                   | Bone, Osteosarcoma                     | NA                                | Localized/Regional                     | NA                                 | UNK        | NA                               | NA                                      | NA                                                 | NA                                             | NA                     | Negative             | No                                         |
| 1073    | No       | NA                               | No           | Yes         | 12.83 | Male   | Yes          | 25.35       | Mixed-breed             | NA                             | 3.0       | NA      | Yes                            | No                                   | Oral Cavity                            | NA                                | Localized/Regional                     | NA                                 | <=5cm      | NA                               | NA                                      | NA                                                 | NA                                             | NA                     | Negative             | No                                         |
| 1074    | Yes      | Enrollment or Clinical Deviation | No           | No          | 10.50 | Female | Yes          | 20.54       | Mixed-breed             | NA                             | 0.0       | 2.0     | Yes                            | No                                   | NA                                     | NA                                | NA                                     | NA                                 | NA         | NA                               | NA                                      | NA                                                 | NA                                             | NA                     | Negative             | No                                         |
| 1075    | No       | NA                               | Yes          | No          | 11.08 | Male   | Yes          | 29.96       | Mixed-breed             | NA                             | 3.0       | 1.0     | Yes                            | No                                   | Bone, Multilobular Osteochondrosarcoma | NA                                | Localized/Regional                     | NA                                 | <=5cm      | NA                               | NA                                      | NA                                                 | NA                                             | NA                     | Negative             | No                                         |
| 1076    | No       | NA                               | No           | Yes         | 15.75 | Female | Yes          | 24.95       | Purebred                | Siberian Husky                 | 3.0       | 2.0     | Yes                            | No                                   | Mammary Gland Carcinoma                | NA                                | Disseminated/Metastatic                | NA                                 | >5cm       | NA                               | NA                                      | NA                                                 | NA                                             | NA                     | Positive             | No                                         |
| 1077    | No       | NA                               | Yes          | No          | 8.75  | Female | Yes          | 37.38       | Purebred                | Labrador Retriever             | 4.0       | 2.0     | Yes                            | No                                   | Oral Cavity                            | NA                                | Localized/Regional                     | NA                                 | <=5cm      | NA                               | NA                                      | NA                                                 | NA                                             | NA                     | Negative             | No                                         |
| 1078    | Yes      | Laboratory Workflow Deviation    | No           | No          | 12.50 | Male   | Yes          | 38.08       | Mixed-breed             | NA                             | 1.0       | 2.0     | Yes                            | No                                   | NA                                     | NA                                | NA                                     | NA                                 | NA         | NA                               | NA                                      | NA                                                 | NA                                             | NA                     | Positive             | No                                         |
| 1079    | Yes      | Laboratory Workflow Deviation    | No           | No          | 3.75  | Male   | Yes          | 7.52        | Purebred                | Dachshund                      | 4.0       | 1.0     | Yes                            | No                                   | NA                                     | NA                                |                                        |                                    |            |                                  |                                         |                                                    |                                                |                        |                      |                                            |

S1 Table. Full subject level data for subjects enrolled in the CANDiD study (continued)

See legend on last page.

| Subject | Excluded | Reason for Exclusion             | Training Set | Testing Set | Age   | Sex    | Spay/ Neuter | Weight (kg) | Purebred or Mixed Breed | Breed (Purebred)              | Hemolysis | Lipemia | Cancer Diagnosis at Enrollment | Cancer Diagnosed after Liquid Biopsy | Cancer Type             | Immunophenotype (Lymphoid Cancer) | Extent of Disease: Non-Lymphoid Cancer | Extent of Disease: Lymphoid Cancer | Tumor Size | Cancer Type (Cancer #2) | Immunophenotype (Cancer #2 if Lymphoid) | Extent of Disease: Non-Lymphoid Cancer (Cancer #2) | Extent of Disease: Lymphoid Cancer (Cancer #2) | Tumor Size (Cancer #2) | Liquid Biopsy Result | CSO Prediction of Hematological Malignancy |
|---------|----------|----------------------------------|--------------|-------------|-------|--------|--------------|-------------|-------------------------|-------------------------------|-----------|---------|--------------------------------|--------------------------------------|-------------------------|-----------------------------------|----------------------------------------|------------------------------------|------------|-------------------------|-----------------------------------------|----------------------------------------------------|------------------------------------------------|------------------------|----------------------|--------------------------------------------|
| 1088    | Yes      | Laboratory Workflow Deviation    | No           | No          | 12.67 | Female | Yes          | 11.62       | Purebred                | Cocker Spaniel                | 2.0       | 1.0     | Yes                            | No                                   | NA                      | NA                                | NA                                     | NA                                 | NA         | NA                      | NA                                      | NA                                                 | NA                                             | NA                     | Positive             | No                                         |
| 1089    | No       | NA                               | No           | Yes         | 11.33 | Female | Yes          | 16.43       | Mixed-breed             | NA                            | 4.0       | 2.0     | Yes                            | No                                   | Large intestine         | NA                                | Localized/Regional                     | NA                                 | <=5cm      | NA                      | NA                                      | NA                                                 | NA                                             | NA                     | Negative             | No                                         |
| 1090    | No       | NA                               | No           | Yes         | 15.50 | Male   | Yes          | 20.04       | Mixed-breed             | NA                            | 2.0       | 1.0     | Yes                            | No                                   | Malignant Melanoma      | NA                                | Localized/Regional                     | NA                                 | <=5cm      | Soft Tissue Sarcoma     | NA                                      | Localized/Regional                                 | NA                                             | <=5cm                  | Negative             | No                                         |
| 1091    | Yes      | Laboratory Workflow Deviation    | No           | No          | 13.58 | Male   | Yes          | 9.02        | Purebred                | Havanese                      | 1.0       | 1.0     | Yes                            | No                                   | NA                      | NA                                | NA                                     | NA                                 | NA         |                         | NA                                      | NA                                                 | NA                                             | NA                     | Negative             | No                                         |
| 1092    | Yes      | Laboratory Workflow Deviation    | No           | No          | 10.75 | Male   | UNK          | 6.31        | Mixed-breed             | NA                            | 4.0       | 2.0     | Yes                            | No                                   | NA                      | NA                                | NA                                     | NA                                 | NA         | NA                      | NA                                      | NA                                                 | NA                                             | NA                     | Negative             | No                                         |
| 1093    | Yes      | Enrollment or Clinical Deviation | No           | No          | 2.33  | Male   | Yes          | 32.27       | Purebred                | Labrador Retriever            | 3.0       | 2.0     | Yes                            | No                                   | NA                      | NA                                | NA                                     | NA                                 | NA         | NA                      | NA                                      | NA                                                 | NA                                             | NA                     | Negative             | No                                         |
| 1094    | Yes      | Laboratory Workflow Deviation    | No           | No          | 11.67 | Female | Yes          | 34.07       | Purebred                | Labrador Retriever            | NA        | 1.0     | Yes                            | No                                   | NA                      | NA                                | NA                                     | NA                                 | NA         | NA                      | NA                                      | NA                                                 | NA                                             | NA                     | Negative             | No                                         |
| 1095    | Yes      | Laboratory Workflow Deviation    | No           | No          | 13.50 | Female | Yes          | 34.07       | Mixed-breed             | NA                            | 2.0       | 2.0     | Yes                            | No                                   | NA                      | NA                                | NA                                     | NA                                 | NA         | NA                      | NA                                      | NA                                                 | NA                                             | NA                     | Positive             | No                                         |
| 1096    | No       | NA                               | Yes          | No          | 9.33  | Male   | Yes          | 46.10       | Purebred                | Boxer                         | 3.5       | 2.0     | Yes                            | No                                   | Soft Tissue Sarcoma     | NA                                | Localized/Regional                     | NA                                 | >5cm       | NA                      | NA                                      | NA                                                 | NA                                             | NA                     | Negative             | No                                         |
| 1097    | Yes      | Enrollment or Clinical Deviation | No           | No          | 13.08 | Male   | Yes          | 35.47       | Purebred                | Labrador Retriever            | 3.0       | 2.0     | Yes                            | No                                   | NA                      | NA                                | NA                                     | NA                                 | NA         | NA                      | NA                                      | NA                                                 | NA                                             | NA                     | Negative             | No                                         |
| 1098    | Yes      | Laboratory Workflow Deviation    | No           | No          | 13.58 | Male   | Yes          | 8.32        | Purebred                | Cavalier King Charles Spaniel | 4.0       | 2.0     | Yes                            | No                                   | NA                      | NA                                | NA                                     | NA                                 | NA         | NA                      | NA                                      | NA                                                 | NA                                             | NA                     | Negative             | No                                         |
| 1099    | Yes      | Laboratory Workflow Deviation    | No           | No          | 7.33  | Female | Yes          | 8.72        | Purebred                | Shih Tzu                      | 3.0       | 2.0     | Yes                            | No                                   | NA                      | NA                                | NA                                     | NA                                 | NA         | NA                      | NA                                      | NA                                                 | NA                                             | NA                     | Negative             | No                                         |
| 1100    | Yes      | Laboratory Workflow Deviation    | No           | No          | 13.42 | Male   | Yes          | 9.32        | Purebred                | Russell Terrier               | 4.0       | 2.0     | Yes                            | No                                   | NA                      | NA                                | NA                                     | NA                                 | NA         | NA                      | NA                                      | NA                                                 | NA                                             | NA                     | Negative             | No                                         |
| 1101    | Yes      | Laboratory Workflow Deviation    | No           | No          | 8.58  | Female | Yes          | 48.40       | Purebred                | Bernese Mountain Dogs         | 3.0       | 2.0     | Yes                            | No                                   | NA                      | NA                                | NA                                     | NA                                 | NA         | NA                      | NA                                      | NA                                                 | NA                                             | NA                     | Negative             | No                                         |
| 1102    | No       | NA                               | No           | Yes         | 7.25  | Male   | Yes          | 32.47       | Purebred                | Chesapeake Bay Retriever      | 2.0       | 1.0     | Yes                            | No                                   | Oral Cavity             | NA                                | Disseminated/Metastatic                | NA                                 | >5cm       | NA                      | NA                                      | NA                                                 | NA                                             | NA                     | Negative             | No                                         |
| 1103    | Yes      | Laboratory Workflow Deviation    | No           | No          | 13.75 | Female | Yes          | 4.51        | Purebred                | Maltese                       | 4.0       | 2.0     | Yes                            | No                                   | Spinal Cord             | NA                                | Localized/Regional                     | NA                                 | <=5cm      | NA                      | NA                                      | NA                                                 | NA                                             | NA                     | Negative             | No                                         |
| 1104    | Yes      | Laboratory Workflow Deviation    | No           | No          | 5.25  | Male   | Yes          | 23.55       | Mixed-breed             | NA                            | 3.0       | 1.0     | Yes                            | No                                   | NA                      | NA                                | NA                                     | NA                                 | NA         | NA                      | NA                                      | NA                                                 | NA                                             | NA                     | Positive             | No                                         |
| 1105    | Yes      | Laboratory Workflow Deviation    | No           | No          | 8.92  | Male   | Yes          | 41.79       | Purebred                | Labrador Retriever            | 2.0       | 1.0     | Yes                            | No                                   | NA                      | NA                                | NA                                     | NA                                 | NA         | NA                      | NA                                      | NA                                                 | NA                                             | NA                     | Negative             | No                                         |
| 1106    | No       | NA                               | No           | Yes         | 9.58  | Female | Yes          | 14.23       | Purebred                | Kerry Blue Terrier            | 3.0       | 2.0     | Yes                            | No                                   | Urinary Bladder/Urethra | NA                                | Localized/Regional                     | NA                                 | <=5cm      | Oral Cavity             | NA                                      | Localized/Regional                                 | NA                                             | <=5cm                  | Negative             | No                                         |
| 1107    | No       | NA                               | No           | Yes         | 8.67  | Female | No           | 28.36       | Purebred                | Labrador Retriever            | 2.0       | 2.0     | Yes                            | No                                   | Lung                    | NA                                | Localized/Regional                     | NA                                 | >5cm       |                         | NA                                      | NA                                                 | NA                                             | NA                     | Negative             | No                                         |
| 1108    | No       | NA                               | No           | Yes         | 12.42 | Female | Yes          | 27.36       | Mixed-breed             | NA                            | 4.0       | 2.0     | Yes                            | No                                   | Bone, Osteosarcoma      | NA                                | Localized/Regional                     | NA                                 | <=5cm      | NA                      | NA                                      | NA                                                 | NA                                             | NA                     | Positive             | No                                         |
| 1109    | Yes      | Test failure                     | No           | No          | 7.00  | Male   | No           | 11.02       | Purebred                | Boston Terrier                | 4.0       | 2.0     | Yes                            | No                                   | Hemangiosarcoma         | NA                                | Localized/Regional                     | NA                                 | <=5cm      | Mast Cell Tumor         | NA                                      | Localized/Regional                                 | NA                                             | <=5cm                  | Negative             | No                                         |
| 1110    | Yes      | Laboratory Workflow Deviation    | No           | No          | 5.00  | Female | Yes          | 36.08       | Purebred                | Rhodesian Ridgeback           | 3.0       | NA      | Yes                            | No                                   | NA                      | NA                                | NA                                     | NA                                 | NA         |                         | NA                                      | NA                                                 | NA                                             | NA                     | Negative             | No                                         |
| 1111    | Yes      | Laboratory Workflow Deviation    | No           | No          | 12.00 | Female | Yes          | 24.95       | Mixed-breed             | NA                            | 3.0       | 2.0     | Yes                            | No                                   | NA                      | NA                                | NA                                     | NA                                 | NA         | NA                      | NA                                      | NA                                                 | NA                                             | NA                     | Positive             | No                                         |
| 1112    | Yes      | Laboratory Workflow Deviation    | No           | No          | 10.67 | Male   | Yes          | 16.63       | Mixed-breed             | NA                            | 3.0       | 2.0     | Yes                            | No                                   | NA                      | NA                                | NA                                     | NA                                 | NA         | NA                      | NA                                      | NA                                                 | NA                                             | NA                     | Negative             | No                                         |
| 1113    | No       | NA                               | No           | Yes         | 10.00 | Female | Yes          | 38.38       | Mixed-breed             | NA                            | 2.0       | 1.0     | Yes                            | No                                   | Bone, Osteosarcoma      | NA                                | Localized/Regional                     | NA                                 | UNK        | NA                      | NA                                      | NA                                                 | NA                                             | NA                     | Positive             | No                                         |
| 1114    | Yes      | Laboratory Workflow Deviation    | No           | No          | 10.08 | Female | No           | 33.27       | Mixed-breed             | NA                            | 3.0       | NA      | Yes                            | No                                   | NA                      | NA                                | NA                                     | NA                                 | NA         | NA                      | NA                                      | NA                                                 | NA                                             | NA                     | Negative             | No                                         |
| 1115    | Yes      | Enrollment or Clinical Deviation | No           | No          | 9.58  | Male   | Yes          | 30.26       | Mixed-breed             | NA                            | 2.0       | 2.0     | Yes                            | No                                   | NA                      | NA                                | NA                                     | NA                                 | NA         | NA                      | NA                                      | NA                                                 | NA                                             | NA                     | Negative             | No                                         |
| 1116    | No       | NA                               | No           | Yes         | 10.17 | Male   | Yes          | 35.27       | Purebred                | German Shepherd               | 2.0       | 0.0     | Yes                            | No                                   | Pancreas, Endocrine     | NA                                | Disseminated/Metastatic                | NA                                 | >5cm       | NA                      | NA                                      | NA                                                 | NA                                             | NA                     | Negative             | No                                         |
| 1117    | Yes      | Laboratory Workflow Deviation    | No           | No          | 10.00 | Male   | Yes          | 9.12        | Purebred                | American Eskimo Dog           | 4.0       | NA      | Yes                            | No                                   | NA                      | NA                                | NA                                     | NA                                 | NA         | NA                      | NA                                      | NA                                                 | NA                                             | NA                     | Negative             | No                                         |
| 1118    | Yes      | Laboratory Workflow Deviation    | No           | No          | 14.17 | Male   | Yes          | 6.31        | Purebred                | Poodle, Toy                   | 3.0       | 2.0     | Yes                            | No                                   | NA                      | NA                                | NA                                     | NA                                 | NA         | NA                      | NA                                      | NA                                                 | NA                                             | NA                     | Negative             | No                                         |
| 1119    | No       | NA                               | No           | Yes         | 7.83  | Male   | No           | 29.56       | Purebred                | Flat-Coated Retriever         | 2.0       | 1.0     | Yes                            | No                                   | Oral Cavity             | NA                                | Undetermined                           | NA                                 | <=5cm      | NA                      | NA                                      | NA                                                 | NA                                             | NA                     | Negative             | No                                         |
| 1120    | Yes      | Laboratory Workflow Deviation    | No           | No          | 14.67 | Female | Yes          | 11.72       | Mixed-breed             | NA                            | 3.0       | 2.0     | Yes                            | No                                   | NA                      | NA                                | NA                                     | NA                                 | NA         | NA                      | NA                                      | NA                                                 | NA                                             | NA                     | Negative             | No                                         |
| 1121    | No       | NA                               | No           | Yes         | 4.17  | Male   | Yes          | 14.03       | Purebred                | Cocker Spaniel                | 2.0       | 1.5     | Yes                            | No                                   | Mast Cell Tumor         | NA                                | Localized/Regional                     | NA                                 | <=5cm      | NA                      | NA                                      | NA                                                 | NA                                             | NA                     | Negative             | No                                         |
| 1122    | No       | NA                               | Yes          | No          | 8.08  | Male   | Yes          | 29.76       | Purebred                | Boxer                         | 3.0       | 2.0     | Yes                            | No                                   | Mast Cell Tumor         | NA                                | Localized/Regional                     | NA                                 | <=5cm      | NA                      | NA                                      | NA                                                 | NA                                             | NA                     | Negative             | No                                         |
| 1123    | No       | NA                               | No           | Yes         | 8.83  | Female | Yes          | 26.76       | Purebred                | Labrador Retriever            | 2.5       | 2.0     | Yes                            | No                                   | Mast Cell Tumor         | NA                                | Localized/Regional                     | NA                                 | >5cm       | NA                      | NA                                      | NA                                                 | NA                                             | NA                     | Negative             | No                                         |
| 1124    | Yes      | Enrollment or Clinical Deviation | No           | No          | 5.00  | Male   | Yes          | 19.04       | Mixed-breed             | NA                            | 2.5       | 1.0     | Yes                            | No                                   | NA                      | NA                                | NA                                     | NA                                 | NA         | NA                      | NA                                      | NA                                                 | NA                                             | NA                     | Negative             | No                                         |
| 1125    | No       | NA                               | No           | Yes         | 9.67  | Male   | Yes          | 27.46       | Purebred                | Labrador Retriever            | 2.0       | 1.0     | Yes                            | No                                   | Soft Tissue Sarcoma     | NA                                | Localized/Regional                     | NA                                 | <=5cm      | NA                      | NA                                      | NA                                                 | NA                                             | NA                     | Negative             | No                                         |
| 1126    | No       | NA                               | No           | Yes         | 7.00  | Female | Yes          | 27.36       | Purebred                | Labrador Retriever            | 3.5       | 1.5     | Yes                            | No                                   | Mast Cell Tumor         | NA                                | Disseminated/Metastatic                | NA                                 | >5cm       | NA                      | NA                                      | NA                                                 | NA                                             | NA                     | Negative             | No                                         |
| 1127    | Yes      | Laboratory Workflow Deviation    | No           | No          | 7.83  | Female | Yes          | 24.75       | Purebred                | Siberian Husky                | 3.0       | 2.0     | Yes                            | No                                   | NA                      | NA                                | NA                                     | NA                                 | NA         | NA                      | NA                                      | NA                                                 | NA                                             | NA                     | Fail                 | No                                         |
| 1128    | No       | NA                               | No           | Yes         | 10.17 | Female | Yes          | 36.88       | Mixed-breed             | NA                            | 2.0       | 2.0     | Yes                            | No                                   | Oral Cavity             | NA                                | Localized/Regional                     | NA                                 | >5cm       | NA                      | NA                                      | NA                                                 | NA                                             | NA                     | Positive             | No                                         |
| 1129    | No       | NA                               | No           | Yes         | 10.42 | Male   | Yes          | 38.38       | Mixed-breed             | NA                            | 1.5       | 2.0     | Yes                            | No                                   | Bone, Osteosarcoma      | NA                                | Localized/Regional                     | NA                                 | <=5cm      | NA                      | NA                                      | NA                                                 | NA                                             | NA                     | Positive             | No                                         |
| 1130    | No       | NA                               | No           | Yes         | 11.00 | Female | Yes          | 36.58       | Mixed-breed             | NA                            | 2.0       | 2.0     | Yes                            | No                                   | Bone, Osteosarcoma      | NA                                | Localized/Regional                     | NA                                 | UNK        | NA                      | NA                                      | NA                                                 | NA                                             | NA                     | Positive             | No                                         |
| 1131    | No       | NA                               | No           | Yes         | 10.83 | Female | Yes          | 10.22       | Purebred                | West Highland White Terrier   | 2.5       | 2.0     | Yes                            | No                                   | Soft Tissue Sarcoma     | NA                                | Localized/Regional                     | NA                                 | <=5cm      | NA                      | NA                                      | NA                                                 | NA                                             | NA                     | Negative             | No                                         |
| 1132    | No       | NA                               | No           | Yes         | 12.83 | Female | Yes          | 19.04       | Purebred                | Brittany                      | 3.0       | 2.0     | Yes                            | No                                   | Soft Tissue Sarcoma     | NA                                | Localized/Regional                     | NA                                 | >5cm       | NA                      | NA                                      | NA                                                 | NA                                             | NA                     | Negative             | No                                         |
| 1133    | Yes      | Laboratory Workflow Deviation    | No           | No          | 12.25 | Female | Yes          | 5.11        | Mixed-breed             | NA                            | 3.0       | 1.0     | Yes                            | No                                   | NA                      | NA                                | NA                                     | NA                                 | NA         | NA                      | NA                                      | NA                                                 | NA                                             | NA                     | Negative             | No                                         |
| 1134    | No       | NA                               | No           | Yes         | 9.83  | Male   | Yes          | 22.35       | Mixed-breed             | NA                            | 3.0       | 2.0     | Yes                            | No                                   | Oral Cavity             | NA                                | Localized/Regional                     | NA                                 | <=5cm      | NA                      | NA                                      | NA                                                 | NA                                             | NA                     | Negative             | No                                         |
| 1135    | No       | NA                               | No           | Yes         | 8.75  | Male   | Yes          | 42.09       | Purebred                | Boxer                         | 3.0       | 2.0     | Yes                            | No                                   | Mast Cell Tumor         | NA                                | Localized/Regional                     | NA                                 | <=5cm      | Soft Tissue Sarcoma     | NA                                      | Localized/Regional                                 | NA                                             | <=5cm                  | Negative             | No                                         |
| 1136    | No       | NA                               | No           | Yes         | 11.33 | Male   | Yes          | 36.08       | Mixed-breed             | NA                            | 2.0       | 1.0     | Yes                            | No                                   | Oral Cavity             | NA                                | Localized/Regional                     | NA                                 | <=5cm      |                         | NA                                      | NA                                                 | NA                                             | NA                     | Positive             | No                                         |
| 1137    | No       | NA                               | No           | Yes         | 9.08  | Male   | Yes          | 29.46       | Purebred                | Flat-Coated Retriever         | 1.0       | 2.0     | Yes                            | No                                   | Soft Tissue Sarcoma     | NA                                | Localized/Regional                     | NA                                 | <=5cm      | NA                      | NA                                      | NA                                                 | NA                                             | NA                     | Negative             | No                                         |
| 1138    | Yes      | Enrollment or Clinical Deviation | No           | No          | 13.17 | Male   | Yes          | 14.23       | Mixed-breed             | NA                            | 3.0       | 2.0     | Yes                            | No                                   | NA                      | NA                                | NA                                     | NA                                 | NA         | NA                      | NA                                      | NA                                                 | NA                                             | NA                     | Negative             | No                                         |
| 1139    | No       | NA                               | No           | Yes         | 7.33  | Male   | Yes          | 24.75       | Mixed-breed             | NA                            | 1.0       | 1.0     | Yes                            | No                                   | Thyroid                 | NA                                | Localized/Regional                     | NA                                 | <=5cm      | NA                      | NA                                      | NA                                                 | NA                                             | NA                     | Negative             | No                                         |
| 1140    | No       | NA                               | Yes          | No          | 10.08 | Male   | No           | 33.97       | Mixed-breed             | NA                            | 1.0       | 1.5     | Yes                            | No                                   | Bile Duct               | NA                                | Disseminated/Metastatic                | NA                                 | >5cm       | NA                      | NA                                      | NA                                                 | NA                                             | NA                     | Positive             | No                                         |
| 1141    | No       | NA                               | No           | Yes         | 14.67 | Female | Yes          | 8.32        | Purebred                | Dachshund                     | 4.0       | 2.0     | Yes                            | No                                   | Liver                   | NA                                | Localized/Regional                     | NA                                 | >5cm       | NA                      | NA                                      | NA                                                 | NA                                             | NA                     | Negative             | No                                         |
| 1142    | No       | NA                               | No           | Yes         | 14.50 | Female | Yes          | 17.44       | Mixed-breed             | NA                            | 4.0       | 2.0     | Yes                            | No                                   | Anal Sac                | NA                                | Localized/Regional                     | NA                                 | <=5cm      | NA                      | NA                                      | NA                                                 | NA                                             | NA                     | Positive             | No                                         |
| 1143    | No       | NA                               | No           | Yes         | 9.42  | Female | Yes          | 8.92        | Purebred                | Pug                           | 2.0       | 2.0     | Yes                            | No                                   | Mast Cell Tumor         | NA                                | Localized/Regional                     | NA                                 | <=5cm      | Mast Cell Tumor         | NA                                      | Localized/Regional                                 | NA                                             | <=5cm                  | Negative             | No                                         |

S1 Table. Full subject level data for subjects enrolled in the CANDiD study (continued)

See legend on last page.

| Subject | Excluded | Reason for Exclusion             | Training Set | Testing Set | Age   | Sex    | Spay/ Neuter | Weight (kg) | Purebred or Mixed Breed | Breed (Purebred)               | Hemolysis | Lipemia | Cancer Diagnosis at Enrollment | Cancer Diagnosed after Liquid Biopsy | Cancer Type                        | Immunophenotype (Lymphoid Cancer) | Extent of Disease: Non-Lymphoid Cancer | Extent of Disease: Lymphoid Cancer | Tumor Size | Cancer Type (Cancer #2) | Immunophenotype (Cancer #2 if Lymphoid) | Extent of Disease: Non-Lymphoid Cancer (Cancer #2) | Extent of Disease: Lymphoid Cancer (Cancer #2) | Tumor Size (Cancer #2) | Liquid Biopsy Result | CSO Prediction of Hematological Malignancy |
|---------|----------|----------------------------------|--------------|-------------|-------|--------|--------------|-------------|-------------------------|--------------------------------|-----------|---------|--------------------------------|--------------------------------------|------------------------------------|-----------------------------------|----------------------------------------|------------------------------------|------------|-------------------------|-----------------------------------------|----------------------------------------------------|------------------------------------------------|------------------------|----------------------|--------------------------------------------|
| 1144    | Yes      | Laboratory Workflow Deviation    | No           | No          | 9.08  | Male   | Yes          | 38.08       | Mixed-breed             | NA                             | 0.0       | 1.0     | Yes                            | No                                   | NA                                 | NA                                | NA                                     | NA                                 | NA         | NA                      | NA                                      | NA                                                 | NA                                             | NA                     | Positive             | No                                         |
| 1145    | No       | NA                               | No           | Yes         | 10.58 | Female | Yes          | 39.38       | Mixed-breed             | NA                             | 3.0       | 2.0     | Yes                            | No                                   | Soft Tissue Sarcoma                | NA                                | Localized/Regional                     | NA                                 | >5cm       | NA                      | NA                                      | NA                                                 | NA                                             | NA                     | Negative             | No                                         |
| 1146    | No       | NA                               | Yes          | No          | 9.67  | Male   | Yes          | 72.15       | Purebred                | Great Dane                     | 3.5       | NA      | Yes                            | No                                   | Soft Tissue Sarcoma                | NA                                | Localized/Regional                     | NA                                 | >5cm       | NA                      | NA                                      | NA                                                 | NA                                             | NA                     | Negative             | No                                         |
| 1147    | No       | NA                               | No           | Yes         | 5.00  | Male   | Yes          | 33.57       | Mixed-breed             | NA                             | 1.0       | 1.0     | Yes                            | No                                   | Nasal Cavity and Paranasal Sinuses | NA                                | Localized/Regional                     | NA                                 | >5cm       | NA                      | NA                                      | NA                                                 | NA                                             | NA                     | Positive             | No                                         |
| 1148    | No       | NA                               | No           | Yes         | 8.83  | Male   | Yes          | 33.47       | Mixed-breed             | NA                             | 2.0       | 1.0     | Yes                            | No                                   | Nasal Cavity and Paranasal Sinuses | NA                                | Localized/Regional                     | NA                                 | >5cm       | NA                      | NA                                      | NA                                                 | NA                                             | NA                     | Negative             | No                                         |
| 1149    | Yes      | Laboratory Workflow Deviation    | No           | No          | 11.00 | Male   | Yes          | 20.84       | Mixed-breed             | NA                             | 3.5       | 1.5     | Yes                            | No                                   | Mast Cell Tumor                    | NA                                | Localized/Regional                     | NA                                 | <=5cm      | NA                      | NA                                      | NA                                                 | NA                                             | NA                     | Negative             | No                                         |
| 1150    | Yes      | Enrollment or Clinical Deviation | No           | No          | 6.00  | Male   | Yes          | 35.37       | Purebred                | Labrador Retriever             | 2.5       | 2.0     | Yes                            | No                                   | NA                                 | NA                                | NA                                     | NA                                 | NA         | NA                      | NA                                      | NA                                                 | NA                                             | NA                     | Negative             | No                                         |
| 1151    | Yes      | Laboratory Workflow Deviation    | No           | No          | 10.50 | Female | Yes          | 20.44       | Purebred                | Australian Cattle Dog          | 4.0       | 1.0     | Yes                            | No                                   | NA                                 | NA                                | NA                                     | NA                                 | NA         | NA                      | NA                                      | NA                                                 | NA                                             | NA                     | Negative             | No                                         |
| 1152    | Yes      | Enrollment or Clinical Deviation | No           | No          | 6.83  | Female | Yes          | 26.05       | Purebred                | Siberian Husky                 | 3.0       | 2.0     | Yes                            | No                                   | NA                                 | NA                                | NA                                     | NA                                 | NA         | NA                      | NA                                      | NA                                                 | NA                                             | NA                     | Negative             | No                                         |
| 1153    | No       | NA                               | No           | Yes         | 2.67  | Female | Yes          | 44.59       | Purebred                | Bernese Mountain Dogs          | 1.5       | 2.0     | Yes                            | No                                   | Hemangiosarcoma                    | NA                                | Localized/Regional                     | NA                                 | >5cm       | NA                      | NA                                      | NA                                                 | NA                                             | NA                     | Positive             | No                                         |
| 1154    | Yes      | Laboratory Workflow Deviation    | No           | No          | 12.25 | Female | Yes          | 23.35       | Mixed-breed             | NA                             | 2.0       | 1.0     | Yes                            | No                                   | NA                                 | NA                                | NA                                     | NA                                 | NA         | NA                      | NA                                      | NA                                                 | NA                                             | NA                     | Negative             | No                                         |
| 1155    | No       | NA                               | No           | Yes         | 11.00 | Female | Yes          | 49.90       | Purebred                | Great Dane                     | 4.0       | 2.0     | Yes                            | No                                   | Bone, Osteosarcoma                 | NA                                | Localized/Regional                     | NA                                 | UNK        | NA                      | NA                                      | NA                                                 | NA                                             | NA                     | Positive             | No                                         |
| 1156    | Yes      | Laboratory Workflow Deviation    | No           | No          | 8.50  | Female | Yes          | 19.04       | Mixed-breed             | NA                             | 2.0       | 1.0     | Yes                            | No                                   | NA                                 | NA                                | NA                                     | NA                                 | NA         | NA                      | NA                                      | NA                                                 | NA                                             | NA                     | Negative             | No                                         |
| 1157    | Yes      | Laboratory Workflow Deviation    | No           | No          | 10.75 | Male   | Yes          | 37.78       | Purebred                | Golden Retriever               | 2.0       | 1.0     | Yes                            | No                                   | NA                                 | NA                                | NA                                     | NA                                 | NA         | NA                      | NA                                      | NA                                                 | NA                                             | NA                     | Negative             | No                                         |
| 1158    | Yes      | Laboratory Workflow Deviation    | No           | No          | 7.58  | Female | Yes          | 22.25       | Mixed-breed             | NA                             | 1.0       | 1.0     | Yes                            | No                                   | NA                                 | NA                                | NA                                     | NA                                 | NA         | NA                      | NA                                      | NA                                                 | NA                                             | NA                     | Positive             | No                                         |
| 1159    | Yes      | Laboratory Workflow Deviation    | No           | No          | 9.00  | Female | Yes          | 22.95       | Purebred                | Brittany                       | NA        | 1.0     | Yes                            | No                                   | NA                                 | NA                                | NA                                     | NA                                 | NA         | NA                      | NA                                      | NA                                                 | NA                                             | NA                     | Negative             | No                                         |
| 1160    | No       | NA                               | No           | Yes         | 8.00  | Female | Yes          | 28.86       | Purebred                | Labrador Retriever             | 1.0       | 2.0     | Yes                            | No                                   | Mast Cell Tumor                    | NA                                | Localized/Regional                     | NA                                 | <=5cm      | NA                      | NA                                      | NA                                                 | NA                                             | NA                     | Negative             | No                                         |
| 1161    | Yes      | Laboratory Workflow Deviation    | No           | No          | 7.17  | Male   | Yes          | 46.30       | Mixed-breed             | NA                             | 2.0       | 2.0     | Yes                            | No                                   | NA                                 | NA                                | NA                                     | NA                                 | NA         | NA                      | NA                                      | NA                                                 | NA                                             | NA                     | Negative             | No                                         |
| 1162    | Yes      | Laboratory Workflow Deviation    | No           | No          | 8.67  | Male   | Yes          | 27.06       | Purebred                | Golden Retriever               | 0.0       | 2.0     | Yes                            | No                                   | NA                                 | NA                                | NA                                     | NA                                 | NA         | NA                      | NA                                      | NA                                                 | NA                                             | NA                     | Positive             | No                                         |
| 1163    | Yes      | Laboratory Workflow Deviation    | No           | No          | 10.75 | Male   | Yes          | 12.03       | Mixed-breed             | NA                             | 4.0       | 2.0     | Yes                            | No                                   | NA                                 | NA                                | NA                                     | NA                                 | NA         | NA                      | NA                                      | NA                                                 | NA                                             | NA                     | Negative             | No                                         |
| 1164    | No       | NA                               | No           | Yes         | 8.00  | Male   | Yes          | 27.86       | Mixed-breed             | NA                             | 0.0       | 2.0     | Yes                            | No                                   | Liver                              | NA                                | Localized/Regional                     | NA                                 | >5cm       | NA                      | NA                                      | NA                                                 | NA                                             | NA                     | Negative             | No                                         |
| 1165    | No       | NA                               | No           | Yes         | 9.00  | Male   | Yes          | 36.88       | Purebred                | Labrador Retriever             | 3.5       | 2.0     | Yes                            | No                                   | Soft Tissue Sarcoma                | NA                                | Localized/Regional                     | NA                                 | >5cm       | NA                      | NA                                      | NA                                                 | NA                                             | NA                     | Positive             | No                                         |
| 1166    | No       | NA                               | No           | Yes         | 9.00  | Male   | Yes          | 36.58       | Mixed-breed             | NA                             | 3.0       | 2.0     | Yes                            | No                                   | Mast Cell Tumor                    | NA                                | Localized/Regional                     | NA                                 | <=5cm      | NA                      | NA                                      | NA                                                 | NA                                             | NA                     | Negative             | No                                         |
| 1167    | No       | NA                               | No           | Yes         | 11.67 | Male   | Yes          | 33.87       | Purebred                | Golden Retriever               | 1.5       | 1.0     | Yes                            | No                                   | Bone, Osteosarcoma                 | NA                                | Localized/Regional                     | NA                                 | UNK        | NA                      | NA                                      | NA                                                 | NA                                             | NA                     | Negative             | No                                         |
| 1168    | No       | NA                               | No           | Yes         | 13.08 | Male   | No           | 32.07       | Mixed-breed             | NA                             | 4.0       | 2.0     | Yes                            | No                                   | Anal Sac                           | NA                                | Localized/Regional                     | NA                                 | <=5cm      | NA                      | NA                                      | NA                                                 | NA                                             | NA                     | Negative             | No                                         |
| 1169    | No       | NA                               | No           | Yes         | 6.83  | Male   | No           | 27.06       | Purebred                | Bull Terrier                   | 2.0       | 2.0     | Yes                            | No                                   | Mast Cell Tumor                    | NA                                | Localized/Regional                     | NA                                 | <=5cm      | NA                      | NA                                      | NA                                                 | NA                                             | NA                     | Negative             | No                                         |
| 1170    | Yes      | Enrollment or Clinical Deviation | No           | No          | 5.08  | Female | Yes          | 24.05       | Mixed-breed             | NA                             | 4.0       | 2.0     | Yes                            | No                                   | NA                                 | NA                                | NA                                     | NA                                 | NA         | NA                      | NA                                      | NA                                                 | NA                                             | NA                     | Negative             | No                                         |
| 1171    | No       | NA                               | No           | Yes         | 4.25  | Female | Yes          | 15.73       | Purebred                | Anatolian Shepherd             | 4.0       | 2.0     | Yes                            | No                                   | Skin                               | NA                                | Disseminated/Metastatic                | NA                                 | <=5cm      | NA                      | NA                                      | NA                                                 | NA                                             | NA                     | Positive             | No                                         |
| 1172    | No       | NA                               | No           | Yes         | 1.92  | Male   | No           | 36.78       | Mixed-breed             | NA                             | 0.0       | 1.0     | Yes                            | No                                   | Hemangiosarcoma                    | NA                                | Undetermined                           | NA                                 | >5cm       | NA                      | NA                                      | NA                                                 | NA                                             | NA                     | Positive             | No                                         |
| 1173    | Yes      | Enrollment or Clinical Deviation | No           | No          | 7.25  | Male   | Yes          | 33.47       | Mixed-breed             | NA                             | 4.0       | 2.0     | Yes                            | No                                   | NA                                 | NA                                | NA                                     | NA                                 | NA         | NA                      | NA                                      | NA                                                 | NA                                             | NA                     | Negative             | No                                         |
| 1174    | No       | NA                               | Yes          | No          | 7.75  | Male   | Yes          | 24.55       | Purebred                | American Staffordshire Terrier | 2.5       | 2.0     | Yes                            | No                                   | Bone, Osteosarcoma                 | NA                                | Localized/Regional                     | NA                                 | >5cm       | NA                      | NA                                      | NA                                                 | NA                                             | NA                     | Positive             | No                                         |
| 1175    | Yes      | Laboratory Workflow Deviation    | No           | No          | 11.50 | Male   | Yes          | 31.37       | Mixed-breed             | NA                             | 3.0       | 1.0     | Yes                            | No                                   | NA                                 | NA                                | NA                                     | NA                                 | NA         | NA                      | NA                                      | NA                                                 | NA                                             | NA                     | Negative             | No                                         |
| 1176    | Yes      | Test failure                     | No           | No          | 7.17  | Male   | Yes          | 25.45       | Mixed-breed             | NA                             | 4.0       | NA      | Yes                            | No                                   | Soft Tissue Sarcoma                | NA                                | Localized/Regional                     | NA                                 | UNK        | NA                      | NA                                      | NA                                                 | NA                                             | NA                     | Negative             | No                                         |
| 1177    | Yes      | Laboratory Workflow Deviation    | No           | No          | 10.08 | Female | Yes          | 28.86       | Mixed-breed             | NA                             | 4.0       | 1.0     | Yes                            | No                                   | NA                                 | NA                                | NA                                     | NA                                 | NA         | NA                      | NA                                      | NA                                                 | NA                                             | NA                     | Negative             | No                                         |
| 1178    | No       | NA                               | No           | Yes         | 10.58 | Male   | Yes          | 29.96       | Mixed-breed             | NA                             | 4.0       | 2.0     | Yes                            | No                                   | Mast Cell Tumor                    | NA                                | Disseminated/Metastatic                | NA                                 | >5cm       | NA                      | NA                                      | NA                                                 | NA                                             | NA                     | Negative             | No                                         |
| 1179    | No       | NA                               | No           | Yes         | 5.00  | Female | No           | 23.45       | Purebred                | Boxer                          | 3.0       | 2.0     | Yes                            | No                                   | Mast Cell Tumor                    | NA                                | Localized/Regional                     | NA                                 | <=5cm      | NA                      | NA                                      | NA                                                 | NA                                             | NA                     | Negative             | No                                         |
| 1180    | No       | NA                               | Yes          | No          | 7.17  | Female | Yes          | 26.05       | Mixed-breed             | NA                             | 1.5       | 2.0     | Yes                            | No                                   | Bone, Osteosarcoma                 | NA                                | Localized/Regional                     | NA                                 | NA         | NA                      | NA                                      | NA                                                 | NA                                             | NA                     | Positive             | No                                         |
| 1181    | No       | NA                               | Yes          | No          | 7.83  | Female | Yes          | 30.06       | Mixed-breed             | NA                             | 3.0       | 2.0     | Yes                            | No                                   | Soft Tissue Sarcoma                | NA                                | Localized/Regional                     | NA                                 | <=5cm      | NA                      | NA                                      | NA                                                 | NA                                             | NA                     | Negative             | No                                         |
| 1182    | Yes      | Laboratory Workflow Deviation    | No           | No          | 8.00  | Male   | Yes          | 28.86       | Mixed-breed             | NA                             | 3.0       |         |                                |                                      |                                    |                                   |                                        |                                    |            |                         |                                         |                                                    |                                                |                        |                      |                                            |

S1 Table. Full subject level data for subjects enrolled in the CANDiD study (continued)

See legend on last page.

| Subject | Excluded | Reason for Exclusion             | Training Set | Testing Set | Age   | Sex    | Spay/ Neuter | Weight (kg) | Purebred or Mixed Breed | Breed (Purebred)           | Hemolysis | Lipemia | Cancer Diagnosis at Enrollment | Cancer Diagnosed after Liquid Biopsy | Cancer Type                          | Immunophenotype (Lymphoid Cancer) | Extent of Disease: Non-Lymphoid Cancer | Extent of Disease: Lymphoid Cancer | Tumor Size | Cancer Type (Cancer #2) | Immunophenotype (Cancer #2 if Lymphoid) | Extent of Disease: Non-Lymphoid Cancer (Cancer #2) | Extent of Disease: Lymphoid Cancer (Cancer #2) | Tumor Size (Cancer #2) | Liquid Biopsy Result | CSO Prediction of Hematological Malignancy |
|---------|----------|----------------------------------|--------------|-------------|-------|--------|--------------|-------------|-------------------------|----------------------------|-----------|---------|--------------------------------|--------------------------------------|--------------------------------------|-----------------------------------|----------------------------------------|------------------------------------|------------|-------------------------|-----------------------------------------|----------------------------------------------------|------------------------------------------------|------------------------|----------------------|--------------------------------------------|
| 1203    | No       | NA                               | Yes          | No          | 9.58  | Male   | Yes          | 27.56       | Purebred                | Golden Retriever           | 3.0       | 1.0     | Yes                            | No                                   | Mast Cell Tumor                      | NA                                | Localized/Regional                     | NA                                 | <=5cm      | NA                      | NA                                      | NA                                                 | NA                                             | NA                     | Negative             | No                                         |
| 1204    | No       | NA                               | No           | Yes         | 12.08 | Female | Yes          | 28.86       | Mixed-breed             | NA                         | 1.0       | 2.0     | Yes                            | No                                   | Soft Tissue Sarcoma                  | NA                                | Localized/Regional                     | NA                                 | >5cm       | NA                      | NA                                      | NA                                                 | NA                                             | NA                     | Negative             | No                                         |
| 1205    | No       | NA                               | No           | Yes         | 14.08 | Male   | Yes          | 9.92        | Mixed-breed             | NA                         | 2.5       | 2.0     | Yes                            | No                                   | Anal Sac                             | NA                                | Localized/Regional                     | NA                                 | <=5cm      | NA                      | NA                                      | NA                                                 | NA                                             | NA                     | Negative             | No                                         |
| 1206    | No       | NA                               | No           | Yes         | 12.50 | Female | Yes          | 24.55       | Purebred                | Labrador Retriever         | 4.0       | 2.0     | Yes                            | No                                   | Mast Cell Tumor                      | NA                                | Localized/Regional                     | NA                                 | <=5cm      | NA                      | NA                                      | NA                                                 | NA                                             | NA                     | Negative             | No                                         |
| 1207    | No       | NA                               | No           | Yes         | 8.50  | Female | Yes          | 23.55       | Mixed-breed             | NA                         | 1.3       | 1.5     | Yes                            | No                                   | Soft Tissue Sarcoma                  | NA                                | Localized/Regional                     | NA                                 | <=5cm      | NA                      | NA                                      | NA                                                 | NA                                             | NA                     | Negative             | No                                         |
| 1208    | No       | NA                               | No           | Yes         | 14.50 | Female | Yes          | 14.43       | Mixed-breed             | NA                         | 3.0       | 1.0     | Yes                            | No                                   | Liver                                | NA                                | Localized/Regional                     | NA                                 | >5cm       | NA                      | NA                                      | NA                                                 | NA                                             | NA                     | Positive             | No                                         |
| 1209    | No       | NA                               | Yes          | No          | 15.08 | Male   | Yes          | 30.16       | Purebred                | Labrador Retriever         | 1.5       | 1.0     | Yes                            | No                                   | Oral Cavity                          | NA                                | Undetermined                           | NA                                 | >5cm       | NA                      | NA                                      | NA                                                 | NA                                             | NA                     | Positive             | No                                         |
| 1210    | No       | NA                               | No           | Yes         | 10.08 | Female | Yes          | 27.73       | Purebred                | Doberman Pinscher          | 1.0       | 2.0     | Yes                            | No                                   | Malignant Melanoma                   | NA                                | Localized/Regional                     | NA                                 | <=5cm      | NA                      | NA                                      | NA                                                 | NA                                             | NA                     | Positive             | No                                         |
| 1211    | Yes      | Enrollment or Clinical Deviation | No           | No          | 8.25  | Female | Yes          | 13.33       | Purebred                | Australian Cattle Dog      | 0.7       | 2.0     | Yes                            | No                                   | NA                                   | NA                                | NA                                     | NA                                 | NA         | NA                      | NA                                      | NA                                                 | NA                                             | NA                     | Negative             | No                                         |
| 1212    | No       | NA                               | No           | Yes         | 10.08 | Female | Yes          | 30.66       | Mixed-breed             | NA                         | 2.0       | 2.0     | Yes                            | No                                   | Soft Tissue Sarcoma                  | NA                                | Localized/Regional                     | NA                                 | >5cm       | NA                      | NA                                      | NA                                                 | NA                                             | NA                     | Negative             | No                                         |
| 1213    | No       | NA                               | No           | Yes         | 11.58 | Male   | Yes          | 31.17       | Purebred                | Labrador Retriever         | 0.5       | 2.0     | Yes                            | No                                   | Soft Tissue Sarcoma                  | NA                                | Localized/Regional                     | NA                                 | >5cm       | NA                      | NA                                      | NA                                                 | NA                                             | NA                     | Positive             | No                                         |
| 1214    | No       | NA                               | No           | Yes         | 12.50 | Female | Yes          | 33.37       | Purebred                | Labrador Retriever         | 1.0       | 2.0     | Yes                            | No                                   | Soft Tissue Sarcoma                  | NA                                | Disseminated/Metastatic                | NA                                 | >5cm       | NA                      | NA                                      | NA                                                 | NA                                             | NA                     | Positive             | No                                         |
| 1215    | Yes      | Enrollment or Clinical Deviation | No           | No          | 14.17 | Male   | Yes          | 11.42       | Mixed-breed             | NA                         | 3.0       | 2.0     | Yes                            | No                                   | NA                                   | NA                                | NA                                     | NA                                 | NA         | NA                      | NA                                      | NA                                                 | NA                                             | NA                     | Negative             | No                                         |
| 1216    | Yes      | Laboratory Workflow Deviation    | No           | No          | 14.08 | Male   | Yes          | 6.81        | Mixed-breed             | NA                         | 1.0       | 2.0     | Yes                            | No                                   | NA                                   | NA                                | NA                                     | NA                                 | NA         | NA                      | NA                                      | NA                                                 | NA                                             | NA                     | Positive             | No                                         |
| 1217    | No       | NA                               | Yes          | No          | 7.58  | Male   | Yes          | 38.58       | Mixed-breed             | NA                         | 1.0       | 1.0     | Yes                            | No                                   | Bone, Osteosarcoma                   | NA                                | Localized/Regional                     | NA                                 | <=5cm      | NA                      | NA                                      | NA                                                 | NA                                             | NA                     | Positive             | No                                         |
| 1218    | No       | NA                               | No           | Yes         | 9.00  | Female | Yes          | 29.06       | Mixed-breed             | NA                         | 2.0       | 1.0     | Yes                            | No                                   | Chondrosarcoma                       | NA                                | Localized/Regional                     | NA                                 | <=5cm      | NA                      | NA                                      | NA                                                 | NA                                             | NA                     | Negative             | No                                         |
| 1219    | No       | NA                               | No           | Yes         | 6.92  | Female | Yes          | 24.25       | Mixed-breed             | NA                         | 4.0       | 2.0     | Yes                            | No                                   | Bone, Osteosarcoma                   | NA                                | Localized/Regional                     | NA                                 | <=5cm      | NA                      | NA                                      | NA                                                 | NA                                             | NA                     | Positive             | No                                         |
| 1220    | No       | NA                               | No           | Yes         | 10.33 | Male   | Yes          | 30.86       | Mixed-breed             | NA                         | 3.5       | 2.0     | Yes                            | No                                   | Histiocytic Sarcoma                  | NA                                | Localized/Regional                     | NA                                 | <=5cm      | NA                      | NA                                      | NA                                                 | NA                                             | NA                     | Negative             | No                                         |
| 1221    | No       | NA                               | Yes          | No          | 13.42 | Female | Yes          | 10.02       | Mixed-breed             | NA                         | 4.0       | NA      | Yes                            | No                                   | Nasal Cavity and Paranasal Sinuses   | NA                                | Localized/Regional                     | NA                                 | <=5cm      | Oral Cavity             | NA                                      | Localized/Regional                                 | NA                                             | <=5cm                  | Negative             | No                                         |
| 1222    | No       | NA                               | No           | Yes         | 15.08 | Male   | Yes          | 12.43       | Mixed-breed             | NA                         | 2.0       | 1.0     | Yes                            | No                                   | Mast Cell Tumor                      | NA                                | Disseminated/Metastatic                | NA                                 | <=5cm      | NA                      | NA                                      | NA                                                 | NA                                             | NA                     | Positive             | No                                         |
| 1223    | No       | NA                               | No           | Yes         | 8.33  | Female | Yes          | 37.48       | Purebred                | Labrador Retriever         | 1.5       | 1.0     | Yes                            | No                                   | Mast Cell Tumor                      | NA                                | Localized/Regional                     | NA                                 | <=5cm      | NA                      | NA                                      | NA                                                 | NA                                             | NA                     | Negative             | No                                         |
| 1224    | No       | NA                               | Yes          | No          | 8.42  | Male   | No           | 19.04       | Mixed-breed             | NA                         | 3.0       | 2.0     | Yes                            | No                                   | Soft Tissue Sarcoma                  | NA                                | Localized/Regional                     | NA                                 | >5cm       | NA                      | NA                                      | NA                                                 | NA                                             | NA                     | Negative             | No                                         |
| 1225    | No       | NA                               | No           | Yes         | 12.75 | Male   | No           | 35.37       | Purebred                | Labrador Retriever         | 4.0       | 2.0     | Yes                            | No                                   | Nasal Planum                         | NA                                | Localized/Regional                     | NA                                 | <=5cm      | NA                      | NA                                      | NA                                                 | NA                                             | NA                     | Negative             | No                                         |
| 1226    | No       | NA                               | Yes          | No          | 11.00 | Male   | Yes          | 24.05       | Purebred                | Greyhound                  | 4.0       | 2.0     | Yes                            | No                                   | Bone, Osteosarcoma                   | NA                                | Localized/Regional                     | NA                                 | >5cm       | NA                      | NA                                      | NA                                                 | NA                                             | NA                     | Positive             | No                                         |
| 1227    | Yes      | Laboratory Workflow Deviation    | No           | No          | 12.92 | Male   | Yes          | 7.82        | Purebred                | Cairn Terrier              | 2.0       | 0.0     | Yes                            | No                                   | NA                                   | NA                                | NA                                     | NA                                 | NA         | NA                      | NA                                      | NA                                                 | NA                                             | NA                     | Negative             | No                                         |
| 1228    | No       | NA                               | No           | Yes         | 9.42  | Male   | Yes          | 12.63       | Mixed-breed             | NA                         | 3.0       | 2.0     | Yes                            | No                                   | Mast Cell Tumor                      | NA                                | Localized/Regional                     | NA                                 | <=5cm      | NA                      | NA                                      | NA                                                 | NA                                             | NA                     | Negative             | No                                         |
| 1229    | Yes      | Laboratory Workflow Deviation    | No           | No          | 9.83  | Male   | Yes          | 5.61        | Mixed-breed             | NA                         | 4.0       | 2.0     | Yes                            | No                                   | NA                                   | NA                                | NA                                     | NA                                 | NA         | NA                      | NA                                      | NA                                                 | NA                                             | NA                     | Positive             | No                                         |
| 1230    | No       | NA                               | Yes          | No          | 10.00 | Female | Yes          | 24.45       | Mixed-breed             | NA                         | 2.0       | 1.0     | Yes                            | No                                   | Malignant Melanoma                   | NA                                | Localized/Regional                     | NA                                 | <=5cm      | NA                      | NA                                      | NA                                                 | NA                                             | NA                     | Negative             | No                                         |
| 1231    | No       | NA                               | No           | Yes         | 8.33  | Female | Yes          | 33.87       | Mixed-breed             | NA                         | 0.5       | 1.5     | Yes                            | No                                   | Mast Cell Tumor                      | NA                                | Localized/Regional                     | NA                                 | <=5cm      | NA                      | NA                                      | NA                                                 | NA                                             | NA                     | Negative             | No                                         |
| 1232    | No       | NA                               | No           | Yes         | 8.67  | Male   | Yes          | 23.75       | Mixed-breed             | NA                         | 3.0       | 2.0     | Yes                            | No                                   | Anal Sac                             | NA                                | Localized/Regional                     | NA                                 | <=5cm      | NA                      | NA                                      | NA                                                 | NA                                             | NA                     | Negative             | No                                         |
| 1233    | No       | NA                               | No           | Yes         | 8.25  | Male   | Yes          | 28.06       | Mixed-breed             | NA                         | 2.0       | 1.0     | Yes                            | No                                   | Bone, Osteosarcoma                   | NA                                | Localized/Regional                     | NA                                 | UNK        | NA                      | NA                                      | NA                                                 | NA                                             | NA                     | Positive             | No                                         |
| 1234    | Yes      | Laboratory Workflow Deviation    | No           | No          | 10.00 | Female | Yes          | 9.52        | Purebred                | Pembroke Welsh Corgi       | 2.0       | 2.0     | Yes                            | No                                   | NA                                   | NA                                | NA                                     | NA                                 | NA         | NA                      | NA                                      | NA                                                 | NA                                             | NA                     | Positive             | No                                         |
| 1235    | No       | NA                               | No           | Yes         | 12.25 | Female | Yes          | 32.07       | Mixed-breed             | NA                         | 0.0       | 1.0     | Yes                            | No                                   | Mast Cell Tumor                      | NA                                | Localized/Regional                     | NA                                 | >5cm       | NA                      | NA                                      | NA                                                 | NA                                             | NA                     | Positive             | No                                         |
| 1236    | Yes      | Enrollment or Clinical Deviation | No           | No          | 10.83 | Male   | Yes          | 31.57       | Purebred                | Golden Retriever           | 3.0       | 2.0     | Yes                            | No                                   | NA                                   | NA                                | NA                                     | NA                                 | NA         | NA                      | NA                                      | NA                                                 | NA                                             | NA                     | Positive             | No                                         |
| 1237    | No       | NA                               | No           | Yes         | 7.83  | Female | Yes          | 28.56       | Mixed-breed             | NA                         | 3.0       | 2.0     | Yes                            | No                                   | Soft Tissue Sarcoma                  | NA                                | Localized/Regional                     | NA                                 | >5cm       | NA                      | NA                                      | NA                                                 | NA                                             | NA                     | Positive             | No                                         |
| 1238    | No       | NA                               | No           | Yes         | 7.67  | Male   | No           | 58.12       | Purebred                | Greater Swiss Mountain Dog | 3.0       | NA      | Yes                            | No                                   | Mast Cell Tumor                      | NA                                | Localized/Regional                     | NA                                 | <=5cm      | NA                      | NA                                      | NA                                                 | NA                                             | NA                     | Negative             | No                                         |
| 1239    | No       | NA                               | No           | Yes         | 8.17  | Female | Yes          | 22.65       | Mixed-breed             | NA                         | 2.0       | 1.0     | Yes                            | No                                   | Oral Cavity                          | NA                                | Localized/Regional                     | NA                                 | <=5cm      | NA                      | NA                                      | NA                                                 | NA                                             | NA                     | Negative             | No                                         |
| 1240    | Yes      | Laboratory Workflow Deviation    | No           | No          | 12.08 | Male   | Yes          | 14.53       | Purebred                | Russell Terrier            | 2.0       | NA      | Yes                            | No                                   | NA                                   | NA                                | NA                                     | NA                                 | NA         | NA                      | NA                                      | NA                                                 | NA                                             | NA                     | Negative             | No                                         |
| 1241    | Yes      | Laboratory Workflow Deviation    | No           | No          | 11.08 | Female | No           | 5.11        | Purebred                | Shih Tzu                   | 2.0       | 2.0     | Yes                            | No                                   | NA                                   | NA                                | NA                                     | NA                                 | NA         | NA                      | NA                                      | NA                                                 | NA                                             | NA                     | Positive             | No                                         |
| 1242    | No       | NA                               | No           | Yes         | 9.08  | Female | Yes          | 22.35       | Mixed-breed             | NA                         | 1.5       | 2.0     | Yes                            | No                                   | Bone, Osteosarcoma                   | NA                                | Localized/Regional                     | NA                                 | >5cm       | NA                      | NA                                      | NA                                                 | NA                                             | NA                     | Negative             | No                                         |
| 1243    | No       | NA                               | No           | Yes         | 8.92  | Female | Yes          | 28.46       | Purebred                | Labrador Retriever         | 3.0       | 2.0     | Yes                            | No                                   | Mast Cell Tumor                      | NA                                | Localized/Regional                     | NA                                 | <=5cm      | NA                      | NA                                      | NA                                                 | NA                                             | NA                     | Negative             | No                                         |
| 1244    | No       | NA                               | No           | Yes         | 6.42  | Male   | Yes          | 47.60       | Purebred                | Golden Retriever           | 2.0       | 2.0     | Yes                            | No                                   | Oral Cavity                          | NA                                | Localized/Regional                     | NA                                 | >5cm       | NA                      | NA                                      | NA                                                 | NA                                             | NA                     | Negative             | No                                         |
| 1245    | No       | NA                               | No           | Yes         | 11.42 | Female | Yes          | 18.44       | Mixed-breed             | NA                         | 3.0       | 1.0     | Yes                            | No                                   | Thyroid                              | NA                                | Localized/Regional                     | NA                                 | >5cm       | NA                      | NA                                      | NA                                                 | NA                                             | NA                     | Negative             | No                                         |
| 1246    | No       | NA                               | No           | Yes         | 9.08  | Male   | Yes          | 60.13       | Purebred                | Bullmastiff                | 2.5       | 1.0     | Yes                            | No                                   | Bone, Osteosarcoma                   | NA                                | Localized/Regional                     | NA                                 | >5cm       | NA                      | NA                                      | NA                                                 | NA                                             | NA                     | Positive             | No                                         |
| 1247    | No       | NA                               | No           | Yes         | 12.25 | Male   | Yes          | 34.57       | Mixed-breed             | NA                         | 3.0       | NA      | Yes                            | No                                   | Anal Sac                             | NA                                | Localized/Regional                     | NA                                 | <=5cm      | NA                      | NA                                      | NA                                                 | NA                                             | NA                     | Negative             | No                                         |
| 1248    | Yes      | Laboratory Workflow Deviation    | No           | No          | 9.75  | Female | Yes          | 26.66       | Purebred                | Boxer                      | 4.0       | 2.0     | Yes                            | No                                   | Thyroid                              | NA                                | Localized/Regional                     | NA                                 | <=5cm      | Mast Cell Tumor         | NA                                      | Localized/Regional                                 | NA                                             | UNK                    | Negative             | No                                         |
| 1249    | Yes      | Laboratory Workflow Deviation    | No           | No          | 15.08 | Male   | Yes          | 10.12       | Purebred                | Bichons Frise              | 4.0       | 2.0     | Yes                            | No                                   | NA                                   | NA                                | NA                                     | NA                                 | NA         | NA                      | NA                                      | NA                                                 | NA                                             | NA                     | Negative             | No                                         |
| 1250    | No       | NA                               | No           | Yes         | 11.42 | Female | Yes          | 42.19       | Purebred                | Rottweiler                 | 0.0       | 1.0     | Yes                            | No                                   | Malignant Melanoma                   | NA                                | Localized/Regional                     | NA                                 | <=5cm      | NA                      | NA                                      | NA                                                 | NA                                             | NA                     | Negative             | No                                         |
| 1251    | No       | NA                               | No           | Yes         | 4.08  | Male   | Yes          | 36.88       | Purebred                | Golden Retriever           | 1.5       | 2.0     | Yes                            | No                                   | Mast Cell Tumor                      | NA                                | Localized/Regional                     | NA                                 | <=5cm      | NA                      | NA                                      | NA                                                 | NA                                             | NA                     | Negative             | No                                         |
| 1252    | No       | NA                               | Yes          | No          | 13.67 | Male   | Yes          | 29.06       | Mixed-breed             | NA                         | 3.0       | 2.0     | Yes                            | No                                   | Oral Cavity                          | NA                                | Localized/Regional                     | NA                                 | <=5cm      | NA                      | NA                                      | NA                                                 | NA                                             | NA                     | Negative             | No                                         |
| 1253    | No       | NA                               | No           | Yes         | 10.08 | Male   | Yes          | 31.67       | Mixed-breed             | NA                         | 2.0       | 0.0     | Yes                            | No                                   | Bone, Osteosarcoma                   | NA                                | Localized/Regional                     | NA                                 | >5cm       | NA                      | NA                                      | NA                                                 | NA                                             | NA                     | Positive             | No                                         |
| 1254    | No       | NA                               | No           | Yes         | 10.42 | Female | Yes          | 31.06       | Mixed-breed             | NA                         | 2.0       | 2.0     | Yes                            | No                                   | Lymphoma, Intermediate to Large Cell | NA                                | NA                                     | Disseminated/ Metastatic           | <=5cm      | NA                      | NA                                      | NA                                                 | NA                                             | NA                     | Negative             | No                                         |
| 1255    | No       | NA                               | No           | Yes         | 9.00  | Female | Yes          | 19.04       | Purebred                | English Bulldog            | 1.0       | 1.0     | Yes                            | No                                   | Bone, Osteosarcoma                   | NA                                | Localized/Regional                     | NA                                 | <=5cm      | NA                      | NA                                      | NA                                                 | NA                                             | NA                     | Negative             | No                                         |
| 1256    | No       | NA                               | No           | Yes         | 13.00 | Female | Yes          | 21.85       | Mixed-breed             | NA                         | 3.0       | 2.0     | Yes                            | No                                   | Mast Cell Tumor                      | NA                                | Localized/Regional                     | NA                                 | >5cm       | NA                      | NA                                      | NA                                                 | NA                                             | NA                     | Negative             | No                                         |
| 1257    | No       | NA                               | Yes          | No          | 10.67 | Female | Yes          | 32.07       | Mixed-breed             | NA                         | 1.5       | 0.0     | Yes                            | No                                   | Mast Cell Tumor                      | NA                                | Localized/Regional                     | NA                                 | <=5cm      | NA                      | NA                                      | NA                                                 | NA                                             | NA                     | Negative             | No                                         |
| 1258    | No       | NA                               | Yes          | No          | 11.00 | Male   | Yes          | 33.07       | Mixed-breed             | NA                         | 1.0       | 2.0     | Yes                            | No                                   | Nasal Cavity and Paranasal Sinuses   | NA                                | Localized/Regional                     | NA                                 | UNK        | NA                      | NA                                      | NA                                                 | NA                                             | NA                     | Negative             | No                                         |
| 1259    | No       | NA                               | No           | Yes         | 5.42  | Male   | Yes          | 12.43       | Purebred                | French Bulldog             | 1.0       | 0.0     | Yes                            | No                                   | Mast Cell Tumor                      | NA                                | Localized/Regional                     | NA                                 | <=5cm      | NA                      | NA                                      | NA                                                 | NA                                             | NA                     | Negative             | No                                         |
| 1260    | Yes      | Enrollment or Clinical Deviation | No           | No          | 4.58  | Male   | No           | 64.84       | Purebred                | Great Dane                 | 2.0       | 2.0     | Yes                            | No                                   | NA                                   | NA                                | NA                                     | NA                                 | NA         | NA                      | NA                                      | NA                                                 | NA                                             | NA                     | Negative             | No                                         |
| 1261    | Yes      | Laboratory Workflow Deviation    | No           | No          | 13.42 | Female | Yes          | 4.51        | Mixed-breed             | NA                         | 2.0       | NA      | Yes                            | No                                   | NA                                   | NA                                | NA                                     | NA                                 | NA         | NA                      | NA                                      | NA                                                 | NA                                             | NA                     | Negative             | No                                         |
| 1262    | No       | NA                               | Yes          | No          | 11.67 | Female | Yes          | 30.26       | Purebred                | Golden Retriever           | 4.0       | 2.0     | Yes                            | No                                   | Mast Cell Tumor                      | NA                                | Localized/Regional                     | NA                                 | <=5cm      | NA                      | NA                                      | NA                                                 | NA                                             | NA                     | Negative             | No                                         |
| 1263    | No       | NA                               | No           | Yes         | 10.92 | Male   | Yes          | 34.37       | Purebred                | Weimaraner                 | 2.0       | 0.0     | Yes                            | No                                   | Thyroid                              | NA                                | Localized/Regional                     | NA                                 | >5cm       | NA                      | NA                                      | NA                                                 | NA                                             | NA                     | Negative             | No                                         |
| 1264    | No       | NA                               | No           | Yes         | 9.00  | Male   | Yes          | 38.78       | Mixed-breed             | NA                         | 1.0       | NA      | Yes                            | No                                   | Hemangiosarcoma                      | NA                                | Disseminated/Metastatic                | NA                                 | <=5cm      | Stomach                 | NA                                      | Undetermined                                       | NA                                             | <=5cm                  | Positive             | Yes                                        |
| 1265    | No       | NA                               | No           | Yes         | 9.92  | Male   | Yes          | 25.05       | Mixed-breed             | NA                         | 2.5       | 2.0     | Yes                            | No                                   | Hemangiosarcoma                      | NA                                | Disseminated/Metastatic                | NA                                 | <=5cm      | Soft Tissue Sarcoma     | NA                                      | Localized/Regional                                 | NA                                             | <=5cm                  | Positive             | No                                         |
| 1266    | Yes      | Enrollment or Clinical Deviation | No           | No          | 10.92 | Female | Yes          | 34.77       | Mixed-breed             | NA                         | 1.0       | 0.0     | Yes                            | No                                   | NA                                   | NA                                | NA                                     | NA                                 | NA         |                         |                                         |                                                    |                                                |                        |                      |                                            |

S1 Table. Full subject level data for subjects enrolled in the CANDiD study (continued)

See legend on last page.

| Subject | Excluded | Reason for Exclusion             | Training Set | Testing Set | Age   | Sex    | Spay/ Neuter | Weight (kg) | Purebred or Mixed Breed | Breed (Purebred)               | Hemolysis | Lipemia | Cancer Diagnosis at Enrollment | Cancer Diagnosed after Liquid Biopsy | Cancer Type                   | Immunophenotype (Lymphoid Cancer) | Extent of Disease: Non-Lymphoid Cancer | Extent of Disease: Lymphoid Cancer | Tumor Size | Cancer Type (Cancer #2) | Immunophenotype (Cancer #2 if Lymphoid) | Extent of Disease: Non-Lymphoid Cancer (Cancer #2) | Extent of Disease: Lymphoid Cancer (Cancer #2) | Tumor Size (Cancer #2) | Liquid Biopsy Result | CSO Prediction of Hematological Malignancy |
|---------|----------|----------------------------------|--------------|-------------|-------|--------|--------------|-------------|-------------------------|--------------------------------|-----------|---------|--------------------------------|--------------------------------------|-------------------------------|-----------------------------------|----------------------------------------|------------------------------------|------------|-------------------------|-----------------------------------------|----------------------------------------------------|------------------------------------------------|------------------------|----------------------|--------------------------------------------|
| 1267    | No       | NA                               | No           | Yes         | 10.42 | Female | Yes          | 27.26       | Mixed-breed             | NA                             | 3.0       | NA      | Yes                            | No                                   | Anal Sac                      | NA                                | Localized/Regional                     | NA                                 | <=5cm      | NA                      | NA                                      | NA                                                 | NA                                             | NA                     | Negative             | No                                         |
| 1268    | Yes      | Enrollment or Clinical Deviation | No           | No          | 10.25 | Female | Yes          | 27.46       | Purebred                | American Staffordshire Terrier | 3.0       | 2.0     | Yes                            | No                                   | NA                            | NA                                | NA                                     | NA                                 | NA         | NA                      | NA                                      | NA                                                 | NA                                             | NA                     | Negative             | No                                         |
| 1269    | No       | NA                               | No           | Yes         | 11.17 | Male   | No           | 17.04       | Purebred                | Beagle                         | 3.5       | 2.0     | Yes                            | No                                   | Mast Cell Tumor               | NA                                | Localized/Regional                     | NA                                 | <=5cm      | NA                      | NA                                      | NA                                                 | NA                                             | NA                     | Negative             | No                                         |
| 1270    | No       | NA                               | No           | Yes         | 9.75  | Female | Yes          | 23.15       | Mixed-breed             | NA                             | 4.0       | NA      | Yes                            | No                                   | Mammary Gland Carcinoma       | NA                                | Localized/Regional                     | NA                                 | <=5cm      | NA                      | NA                                      | NA                                                 | NA                                             | NA                     | Negative             | No                                         |
| 1271    | Yes      | Enrollment or Clinical Deviation | No           | No          | 0.92  | Male   | Yes          | 24.55       | Purebred                | Belgian Malinois               | 3.5       | NA      | Yes                            | No                                   | Mast Cell Tumor               | NA                                | Disseminated/Metastatic                | NA                                 | <=5cm      | NA                      | NA                                      | NA                                                 | NA                                             | NA                     | Negative             | No                                         |
| 1272    | Yes      | Test failure                     | No           | No          | 8.00  | Female | Yes          | 26.05       | Mixed-breed             | NA                             | 4.0       | 2.0     | Yes                            | No                                   | NA                            | NA                                | NA                                     | NA                                 | NA         | NA                      | NA                                      | NA                                                 | NA                                             | NA                     | Indetermi-<br>nate   | No                                         |
| 1273    | Yes      | Enrollment or Clinical Deviation | No           | No          | 5.00  | Female | Yes          | 29.06       | Mixed-breed             | NA                             | 4.0       | 2.0     | Yes                            | No                                   | NA                            | NA                                | NA                                     | NA                                 | NA         | NA                      | NA                                      | NA                                                 | NA                                             | NA                     | Negative             | No                                         |
| 1274    | Yes      | Test failure                     | No           | No          | 7.00  | Male   | Yes          | 24.05       | Mixed-breed             | NA                             | 2.0       | 1.0     | Yes                            | No                                   | Soft Tissue Sarcoma           | NA                                | Localized/Regional                     | NA                                 | <=5cm      | NA                      | NA                                      | NA                                                 | NA                                             | NA                     | Negative             | No                                         |
| 1275    | No       | NA                               | Yes          | No          | 11.00 | Female | Yes          | 7.11        | Purebred                | Shih Tzu                       | 4.0       | 2.0     | Yes                            | No                                   | Mammary Gland Carcinoma       | NA                                | Localized/Regional                     | NA                                 | <=5cm      | NA                      | NA                                      | NA                                                 | NA                                             | NA                     | Positive             | No                                         |
| 1276    | No       | NA                               | No           | Yes         | 10.58 | Male   | Yes          | 26.56       | Purebred                | Border Collie                  | 4.0       | 2.0     | Yes                            | No                                   | Anal Sac                      | NA                                | Localized/Regional                     | NA                                 | <=5cm      | NA                      | NA                                      | NA                                                 | NA                                             | NA                     | Negative             | No                                         |
| 1277    | Yes      | Laboratory Workflow Deviation    | No           | No          | 7.00  | Male   | Yes          | 26.35       | Mixed-breed             | NA                             | 3.0       | 1.0     | Yes                            | No                                   | NA                            | NA                                | NA                                     | NA                                 | NA         | NA                      | NA                                      | NA                                                 | NA                                             | NA                     | Negative             | No                                         |
| 1278    | No       | NA                               | No           | Yes         | 7.67  | Male   | Yes          | 38.28       | Purebred                | Doberman Pinscher              | 1.5       | NA      | Yes                            | No                                   | Bone, Osteosarcoma            | NA                                | Localized/Regional                     | NA                                 | UNK        | NA                      | NA                                      | NA                                                 | NA                                             | NA                     | Positive             | No                                         |
| 1279    | No       | NA                               | Yes          | No          | 7.00  | Male   | No           | 27.46       | Mixed-breed             | NA                             | 3.0       | 1.0     | Yes                            | No                                   | Oral Cavity                   | NA                                | Localized/Regional                     | NA                                 | <=5cm      | NA                      | NA                                      | NA                                                 | NA                                             | NA                     | Negative             | No                                         |
| 1280    | Yes      | Laboratory Workflow Deviation    | No           | No          | 13.92 | Male   | Yes          | 7.22        | Mixed-breed             | NA                             | 4.0       | 2.0     | Yes                            | No                                   | NA                            | NA                                | NA                                     | NA                                 | NA         | NA                      | NA                                      | NA                                                 | NA                                             | NA                     | Negative             | No                                         |
| 1281    | No       | NA                               | Yes          | No          | 10.33 | Female | Yes          | 29.56       | Purebred                | Golden Retriever               | 3.0       | 1.0     | Yes                            | No                                   | Bone, Osteosarcoma            | NA                                | Localized/Regional                     | NA                                 | <=5cm      | NA                      | NA                                      | NA                                                 | NA                                             | NA                     | Positive             | No                                         |
| 1282    | No       | NA                               | No           | Yes         | 9.58  | Male   | Yes          | 30.16       | Purebred                | Siberian Husky                 | 2.0       | NA      | Yes                            | No                                   | Liver                         | NA                                | Localized/Regional                     | NA                                 | >5cm       | NA                      | NA                                      | NA                                                 | NA                                             | NA                     | Negative             | No                                         |
| 1283    | No       | NA                               | No           | Yes         | 7.83  | Female | Yes          | 22.35       | Mixed-breed             | NA                             | 2.5       | 1.0     | Yes                            | No                                   | Soft Tissue Sarcoma           | NA                                | Disseminated/Metastatic                | NA                                 | >5cm       | NA                      | NA                                      | NA                                                 | NA                                             | NA                     | Positive             | No                                         |
| 1284    | Yes      | Laboratory Workflow Deviation    | No           | No          | 2.00  | Male   | Yes          | 47.10       | Purebred                | Akbash                         | 2.0       | 1.0     | Yes                            | No                                   | NA                            | NA                                | NA                                     | NA                                 | NA         | NA                      | NA                                      | NA                                                 | NA                                             | NA                     | Indetermi-<br>nate   | No                                         |
| 1285    | No       | NA                               | No           | Yes         | 11.67 | Male   | Yes          | 36.28       | Mixed-breed             | NA                             | 1.0       | 0.0     | Yes                            | No                                   | Soft Tissue Sarcoma           | NA                                | Localized/Regional                     | NA                                 | >5cm       | NA                      | NA                                      | NA                                                 | NA                                             | NA                     | Negative             | No                                         |
| 1286    | Yes      | Enrollment or Clinical Deviation | No           | No          | 11.17 | Female | Yes          | 12.43       | Mixed-breed             | NA                             | 4.0       | 2.0     | Yes                            | No                                   | NA                            | NA                                | NA                                     | NA                                 | NA         | NA                      | NA                                      | NA                                                 | NA                                             | NA                     | Positive             | No                                         |
| 1287    | No       | NA                               | No           | Yes         | 11.42 | Female | Yes          | 42.29       | Mixed-breed             | NA                             | 3.0       | 2.0     | Yes                            | No                                   | Lung                          | NA                                | Localized/Regional                     | NA                                 | <=5cm      | NA                      | NA                                      | NA                                                 | NA                                             | NA                     | Positive             | No                                         |
| 1288    | Yes      | Laboratory Workflow Deviation    | No           | No          | 8.33  | Male   | No           | 10.42       | Purebred                | Scottish Terrier               | 1.0       | 0.0     | Yes                            | No                                   | NA                            | NA                                | NA                                     | NA                                 | NA         | NA                      | NA                                      | NA                                                 | NA                                             | NA                     | Positive             | No                                         |
| 1289    | No       | NA                               | No           | Yes         | 9.33  | Female | Yes          | 22.35       | Mixed-breed             | NA                             | 4.0       | 2.0     | Yes                            | No                                   | Histiocytic Sarcoma           | NA                                | Localized/Regional                     | NA                                 | <=5cm      | NA                      | NA                                      | NA                                                 | NA                                             | NA                     | Positive             | No                                         |
| 1290    | No       | NA                               | No           | Yes         | 9.17  | Male   | Yes          | 39.58       | Purebred                | German Shepherd                | 2.0       | 1.5     | Yes                            | No                                   | Anal Sac                      | NA                                | Localized/Regional                     | NA                                 | <=5cm      | NA                      | NA                                      | NA                                                 | NA                                             | NA                     | Negative             | No                                         |
| 1291    | No       | NA                               | No           | Yes         | 10.00 | Male   | Yes          | 34.47       | Purebred                | Golden Retriever               | 2.5       | 1.0     | Yes                            | No                                   | Hemangiosarcoma               | NA                                | Localized/Regional                     | NA                                 | >5cm       | NA                      | NA                                      | NA                                                 | NA                                             | NA                     | Positive             | No                                         |
| 1292    | No       | NA                               | No           | Yes         | 10.08 | Male   | Yes          | 9.52        | Purebred                | Rat Terrier                    | 3.0       | 1.5     | Yes                            | No                                   | Salivary Gland                | NA                                | Localized/Regional                     | NA                                 | >5cm       | NA                      | NA                                      | NA                                                 | NA                                             | NA                     | Positive             | No                                         |
| 1293    | No       | NA                               | No           | Yes         | 11.08 | Male   | Yes          | 22.85       | Mixed-breed             | NA                             | 1.0       | 0.0     | Yes                            | No                                   | Pancreas, Endocrine           | NA                                | Localized/Regional                     | NA                                 | <=5cm      | NA                      | NA                                      | NA                                                 | NA                                             | NA                     | Negative             | No                                         |
| 1294    | No       | NA                               | No           | Yes         | 10.17 | Male   | Yes          | 43.39       | Mixed-breed             | NA                             | 3.0       | NA      | Yes                            | No                                   | Anal Sac                      | NA                                | Localized/Regional                     | NA                                 | <=5cm      | NA                      | NA                                      | NA                                                 | NA                                             | NA                     | Positive             | No                                         |
| 1295    | Yes      | Test failure                     | No           | No          | 9.00  | Male   | Yes          | 15.83       | Mixed-breed             | NA                             | 4.0       | 2.0     | Yes                            | No                                   | Anal Sac                      | NA                                | Localized/Regional                     | NA                                 | >5cm       | NA                      | NA                                      | NA                                                 | NA                                             | NA                     | Positive             | No                                         |
| 1296    | Yes      | Laboratory Workflow Deviation    | No           | No          | 6.08  | Female | Yes          | 41.09       | Mixed-breed             | NA                             | 4.0       | 2.0     | Yes                            | No                                   | NA                            | NA                                | NA                                     | NA                                 | NA         | NA                      | NA                                      | NA                                                 | NA                                             | NA                     | Negative             | No                                         |
| 1297    | No       | NA                               | No           | Yes         | 10.00 | Female | Yes          | 36.58       | Mixed-breed             | NA                             | 2.0       | 2.0     | Yes                            | No                                   | Bone, Osteosarcoma            | NA                                | Disseminated/Metastatic                | NA                                 | <=5cm      | NA                      | NA                                      | NA                                                 | NA                                             | NA                     | Positive             | No                                         |
| 1298    | No       | NA                               | No           | Yes         | 9.33  | Female | Yes          | 36.88       | Purebred                | Rhodesian Ridgeback            | 4.0       | 2.0     | Yes                            | No                                   | Soft Tissue Sarcoma           | NA                                | Localized/Regional                     | NA                                 | >5cm       | NA                      | NA                                      | NA                                                 | NA                                             | NA                     | Negative             | No                                         |
| 1299    | No       | NA                               | No           | Yes         | 10.67 | Male   | Yes          | 28.06       | Mixed-breed             | NA                             | 2.0       | NA      | Yes                            | No                                   | Soft Tissue Sarcoma           | NA                                | Localized/Regional                     | NA                                 | <=5cm      | NA                      | NA                                      | NA                                                 | NA                                             | NA                     | Negative             | No                                         |
| 1300    | Yes      | Test failure                     | No           | No          | 1.92  | Male   | No           | 32.47       | Purebred                | Rottweiler                     | 3.0       | 0.0     | Yes                            | No                                   | Bone, Osteosarcoma            | NA                                | Localized/Regional                     | NA                                 | UNK        | NA                      | NA                                      | NA                                                 | NA                                             | NA                     | Positive             | No                                         |
| 1301    | No       | NA                               | No           | Yes         | 9.67  | Male   | No           | 38.58       | Purebred                | German Shepherd                | 3.0       | 0.0     | Yes                            | No                                   | Thyroid                       | NA                                | Localized/Regional                     | NA                                 | <=5cm      | NA                      | NA                                      | NA                                                 | NA                                             | NA                     | Negative             | No                                         |
| 1302    | No       | NA                               | No           | Yes         | 4.92  | Male   | No           | 61.13       | Purebred                | Bulldmastiff                   | 3.0       | 2.0     | Yes                            | No                                   | Bone, Osteosarcoma            | NA                                | Localized/Regional                     | NA                                 | <=5cm      | NA                      | NA                                      | NA                                                 | NA                                             | NA                     | Negative             | No                                         |
| 1303    | No       | NA                               | No           | Yes         | 5.58  | Male   | Yes          | 23.05       | Purebred                | Vizslas                        | 2.0       | 1.0     | Yes                            | No                                   | Mast Cell Tumor               | NA                                | Localized/Regional                     | NA                                 | >5cm       | NA                      | NA                                      | NA                                                 | NA                                             | NA                     | Negative             | No                                         |
| 1304    | No       | NA                               | No           | Yes         | 11.25 | Male   | Yes          | 32.07       | Purebred                | Labrador Retriever             | 4.0       | 2.0     | Yes                            | No                                   | Mast Cell Tumor               | NA                                | Localized/Regional                     | NA                                 | <=5cm      | NA                      | NA                                      | NA                                                 | NA                                             | NA                     | Negative             | No                                         |
| 1305    | No       | NA                               | No           | Yes         | 10.83 | Male   | Yes          | 37.58       | Mixed-breed             | NA                             | 1.0       | 0.0     | Yes                            | No                                   | Bone, Osteosarcoma            | NA                                | Localized/Regional                     | NA                                 | <=5cm      | NA                      | NA                                      | NA                                                 | NA                                             | NA                     | Positive             | No                                         |
| 1307    | No       | NA                               | No           | Yes         | 11.83 | Male   | Yes          | 28.96       | Purebred                | German Shorthaired Pointer     | 3.0       | 1.0     | Yes                            | No                                   | Oral Cavity                   | NA                                | Localized/Regional                     | NA                                 | >5cm       | NA                      | NA                                      | NA                                                 | NA                                             | NA                     | Negative             | No                                         |
| 1308    | Yes      | Test failure                     | No           | No          | 11.83 | Female | Yes          | 20.74       | Mixed-breed             | NA                             | 4.0       | 2.0     | Yes                            | No                                   | Soft Tissue Sarcoma           | NA                                | Localized/Regional                     | NA                                 | <=5cm      | NA                      | NA                                      | NA                                                 | NA                                             | NA                     | Negative             | No                                         |
| 1309    | No       | NA                               | No           | Yes         | 9.33  | Female | Yes          | 30.66       | Purebred                | Siberian Husky                 | 2.0       | 0.0     | Yes                            | No                                   | Mammary Gland Carcinoma       | NA                                | Localized/Regional                     | NA                                 | <=5cm      | NA                      | NA                                      | NA                                                 | NA                                             | NA                     | Negative             | No                                         |
| 1310    | No       | NA                               | No           | Yes         | 6.50  | Female | No           | 36.08       | Purebred                | Boxer                          | NA        | 1.0     | Yes                            | No                                   | Ear Canal                     | NA                                | Disseminated/Metastatic                | NA                                 | <=5cm      | NA                      | NA                                      | NA                                                 | NA                                             | NA                     | Positive             | No                                         |
| 1311    | Yes      | Laboratory Workflow Deviation    | No           | No          | 11.83 | Female | Yes          | 6.01        | Mixed-breed             | NA                             | 2.0       | 2.0     | Yes                            | No                                   | NA                            | NA                                | NA                                     | NA                                 | NA         | NA                      | NA                                      | NA                                                 | NA                                             | NA                     | Positive             | No                                         |
| 1312    | No       | NA                               | No           | Yes         | 2.33  | Female | No           | 22.35       | Purebred                | Boxer                          | 4.0       | 2.0     | Yes                            | No                                   | Lymphoma, Indolent            | NA                                | NA                                     | Disseminated/<br>Metastatic        | <=5cm      | NA                      | NA                                      | NA                                                 | NA                                             | NA                     | Negative             | No                                         |
| 1313    | No       | NA                               | Yes          | No          | 3.00  | Female | Yes          | 28.56       | Purebred                | Golden Retriever               | 3.5       | 1.5     | Yes                            | No                                   | Soft Tissue Sarcoma           | NA                                | Localized/Regional                     | NA                                 | <=5cm      | NA                      | NA                                      | NA                                                 | NA                                             | NA                     | Negative             | No                                         |
| 1314    | No       | NA                               | No           | Yes         | 10.42 | Female | Yes          | 24.25       | Mixed-breed             | NA                             | 1.0       | 1.0     | Yes                            | No                                   | Hemangiosarcoma               | NA                                | Disseminated/Metastatic                | NA                                 | >5cm       | NA                      | NA                                      | NA                                                 | NA                                             | NA                     | Positive             | No                                         |
| 1315    | Yes      | Enrollment or Clinical Deviation | No           | No          | 10.92 | Male   | Yes          | 21.04       | Purebred                | Beagle                         | 3.0       | 1.0     | Yes                            | No                                   | NA                            | NA                                | NA                                     | NA                                 | NA         | NA                      | NA                                      | NA                                                 | NA                                             | NA                     | Negative             | No                                         |
| 1316    | No       | NA                               | Yes          | No          | 8.00  | Female | Yes          | 28.16       | Purebred                | Siberian Husky                 | 2.0       | NA      | Yes                            | No                                   | Soft Tissue Sarcoma           | NA                                | Localized/Regional                     | NA                                 | >5cm       | NA                      | NA                                      | NA                                                 | NA                                             | NA                     | Negative             | No                                         |
| 1317    | Yes      | Laboratory Workflow Deviation    | No           | No          | 11.25 | Female | Yes          | 43.19       | Purebred                | Labrador Retriever             | 3.0       | 2.0     | Yes                            | No                                   | NA                            | NA                                | NA                                     | NA                                 | NA         | NA                      | NA                                      | NA                                                 | NA                                             | NA                     | Negative             | No                                         |
| 1318    | Yes      | Laboratory Workflow Deviation    | No           | No          | 7.08  | Male   | Yes          | 29.36       | Purebred                | English Bulldog                | 3.5       | 2.0     | Yes                            | No                                   | Skin                          | NA                                | Localized/Regional                     | NA                                 | <=5cm      | NA                      | NA                                      | NA                                                 | NA                                             | NA                     | Negative             | No                                         |
| 1319    | No       | NA                               | No           | Yes         | 12.00 | Female | Yes          | 19.44       | Purebred                | Soft Coated Wheaten Terrier    | 4.0       | 2.0     | Yes                            | No                                   | Urinary Bladder/Urethra       | NA                                | Localized/Regional                     | NA                                 | >5cm       | NA                      | NA                                      | NA                                                 | NA                                             | NA                     | Negative             | No                                         |
| 1320    | No       | NA                               | No           | Yes         | 11.00 | Male   | Yes          | 39.58       | Mixed-breed             | NA                             | 3.0       | 2.0     | Yes                            | No                                   | Anal Sac                      | NA                                | Localized/Regional                     | NA                                 | <=5cm      | Bone,<br>Osteosarcoma   | NA                                      | Localized/Regional                                 | NA                                             | UNK                    | Negative             | No                                         |
| 1321    | No       | NA                               | No           | Yes         | 11.83 | Male   | Yes          | 20.04       | Mixed-breed             | NA                             | 2.0       | 0.0     | Yes                            | No                                   | Thyroid                       | NA                                | Localized/Regional                     | NA                                 | >5cm       | NA                      | NA                                      | NA                                                 | NA                                             | NA                     | Negative             | No                                         |
| 1322    | No       | NA                               | No           | Yes         | 10.08 | Male   | Yes          | 47.90       | Purebred                | German Shepherd                | 2.0       | 1.0     | Yes                            | No                                   | Bone, Osteosarcoma            | NA                                | Localized/Regional                     | NA                                 | UNK        | NA                      | NA                                      | NA                                                 | NA                                             | NA                     | Positive             | No                                         |
| 1323    | No       | NA                               | No           | Yes         | 11.92 | Male   | Yes          | 32.57       | Mixed-breed             | NA                             | 3.0       | 2.0     | Yes                            | No                                   | Lung                          | NA                                | Localized/Regional                     | NA                                 | <=5cm      | NA                      | NA                                      | NA                                                 | NA                                             | NA                     | Negative             | No                                         |
| 1324    | Yes      | Laboratory Workflow Deviation    | No           | No          | 12.08 | Male   | Yes          | 8.82        | Purebred                | Boston Terrier                 | 3.0       | 2.0     | Yes                            | No                                   | NA                            | NA                                | NA                                     | NA                                 | NA         | NA                      | NA                                      | NA                                                 | NA                                             | NA                     | Negative             | No                                         |
| 1325    | No       | NA                               | No           | Yes         | 10.17 | Male   | Yes          | 26.96       | Purebred                | Labrador Retriever             | 2.5       | 2.0     | Yes                            | No                                   | Peripheral Nerve Sheath Tumor | NA                                | Localized/Regional                     | NA                                 | <=5cm      | NA                      | NA                                      | NA                                                 | NA                                             | NA                     | Positive             | No                                         |
| 1326    | Yes      | Laboratory Workflow Deviation    | No           | No          | 9.75  | Male   | Yes          | 7.11        | Purebred                | Dachshund                      | 1.0       | 0.0     | Yes                            | No                                   | NA                            | NA                                | NA                                     | NA                                 | NA         | NA                      | NA                                      | NA                                                 | NA                                             | NA                     | Positive             | No                                         |
| 1327    | No       | NA                               | No           | Yes         | 8.25  | Female | Yes          | 37.58       | Mixed-breed             | NA                             | 2.5       | 2.0     | Yes                            | No                                   | Soft Tissue Sarcoma           | NA                                | Localized/Regional                     | NA                                 | <=5cm      | NA                      | NA                                      | NA                                                 | NA                                             | NA                     | Negative             | No                                         |

S1 Table. Full subject level data for subjects enrolled in the CANDiD study

| Subject | Excluded | Reason for Exclusion             | Training Set | Testing Set | Age   | Sex    | Spay/ Neuter | Weight (kg) | Purebred or Mixed Breed | Breed (Purebred)           | Hemolysis | Lipemia | Cancer Diagnosis at Enrollment | Cancer Diagnosed after Liquid Biopsy | Cancer Type             | Immunophenotype (Lymphoid Cancer) | Extent of Disease: Non-Lymphoid Cancer | Extent of Disease: Lymphoid Cancer | Tumor Size | Cancer Type (Cancer #2) | Immunophenotype (Cancer #2 if Lymphoid) | Extent of Disease: Non-Lymphoid Cancer (Cancer #2) | Extent of Disease: Lymphoid Cancer (Cancer #2) | Tumor Size (Cancer #2) | Liquid Biopsy Result | CSO Prediction of Hematological Malignancy |
|---------|----------|----------------------------------|--------------|-------------|-------|--------|--------------|-------------|-------------------------|----------------------------|-----------|---------|--------------------------------|--------------------------------------|-------------------------|-----------------------------------|----------------------------------------|------------------------------------|------------|-------------------------|-----------------------------------------|----------------------------------------------------|------------------------------------------------|------------------------|----------------------|--------------------------------------------|
| 1328    | No       | NA                               | No           | Yes         | 1.92  | Male   | Yes          | 37.78       | Purebred                | Golden Retriever           | 1.0       | 1.0     | Yes                            | No                                   | Bone, Osteosarcoma      | NA                                | Localized/Regional                     | NA                                 | >5cm       | NA                      | NA                                      | NA                                                 | NA                                             | NA                     | Positive             | No                                         |
| 1329    | No       | NA                               | No           | Yes         | 13.75 | Female | Yes          | 22.35       | Purebred                | Siberian Husky             | 2.0       | 2.0     | Yes                            | No                                   | Adrenal Gland           | NA                                | Localized/Regional                     | NA                                 | <=5cm      | NA                      | NA                                      | NA                                                 | NA                                             | NA                     | Negative             | No                                         |
| 1330    | No       | NA                               | No           | Yes         | 6.00  | Male   | Yes          | 53.81       | Purebred                | Golden Retriever           | 1.0       | 1.0     | Yes                            | No                                   | Kidney                  | NA                                | Localized/Regional                     | NA                                 | >5cm       | NA                      | NA                                      | NA                                                 | NA                                             | NA                     | Positive             | No                                         |
| 1331    | No       | NA                               | No           | Yes         | 10.00 | Male   | Yes          | 32.27       | Mixed-breed             | NA                         | 2.5       | 1.0     | Yes                            | No                                   | Thyroid                 | NA                                | Localized/Regional                     | NA                                 | <=5cm      | NA                      | NA                                      | NA                                                 | NA                                             | NA                     | Negative             | No                                         |
| 1332    | No       | NA                               | No           | Yes         | 10.67 | Male   | Yes          | 12.03       | Mixed-breed             | NA                         | 2.5       | 1.0     | Yes                            | No                                   | Liver                   | NA                                | Localized/Regional                     | NA                                 | >5cm       | NA                      | NA                                      | NA                                                 | NA                                             | NA                     | Positive             | No                                         |
| 1333    | Yes      | Laboratory Workflow Deviation    | No           | No          | 5.08  | Male   | Yes          | 33.07       | Mixed-breed             | NA                         | 4.0       | 2.0     | Yes                            | No                                   | Thyroid                 | NA                                | Localized/Regional                     | NA                                 | >5cm       | NA                      | NA                                      | NA                                                 | NA                                             | NA                     | Positive             | No                                         |
| 1334    | No       | NA                               | No           | Yes         | 7.25  | Male   | Yes          | 28.06       | Purebred                | Siberian Husky             | 2.5       | NA      | Yes                            | No                                   | Lung                    | NA                                | Localized/Regional                     | NA                                 | >5cm       | NA                      | NA                                      | NA                                                 | NA                                             | NA                     | Positive             | No                                         |
| 1335    | Yes      | Enrollment or Clinical Deviation | No           | No          | 8.17  | Female | Yes          | 24.25       | Purebred                | Siberian Husky             | 2.0       | 2.0     | Yes                            | No                                   | NA                      | NA                                | NA                                     | NA                                 | NA         | NA                      | NA                                      | NA                                                 | NA                                             | NA                     | Negative             | No                                         |
| 1336    | No       | NA                               | No           | Yes         | 14.50 | Male   | Yes          | 42.69       | Mixed-breed             | NA                         | 4.0       | 1.0     | Yes                            | No                                   | Soft Tissue Sarcoma     | NA                                | Localized/Regional                     | NA                                 | >5cm       | NA                      | NA                                      | NA                                                 | NA                                             | NA                     | Negative             | No                                         |
| 1337    | No       | NA                               | No           | Yes         | 13.92 | Male   | Yes          | 14.73       | Purebred                | Pembroke Welsh Corgi       | 2.0       | 1.0     | Yes                            | No                                   | Hemangiosarcoma         | NA                                | Localized/Regional                     | NA                                 | >5cm       | NA                      | NA                                      | NA                                                 | NA                                             | NA                     | Positive             | No                                         |
| 1338    | Yes      | Laboratory Workflow Deviation    | No           | No          | 2.00  | Female | Yes          | 9.32        | Purebred                | Boston Terrier             | 4.0       | 2.0     | Yes                            | No                                   | NA                      | NA                                | NA                                     | NA                                 | NA         | NA                      | NA                                      | NA                                                 | NA                                             | NA                     | Negative             | No                                         |
| 1339    | No       | NA                               | No           | Yes         | 12.33 | Female | No           | 26.56       | Mixed-breed             | NA                         | 2.0       | 2.0     | Yes                            | No                                   | Mammary Gland Carcinoma | NA                                | Localized/Regional                     | NA                                 | <=5cm      | NA                      | NA                                      | NA                                                 | NA                                             | NA                     | Negative             | No                                         |
| 1340    | Yes      | Laboratory Workflow Deviation    | No           | No          | 13.67 | Male   | Yes          | 37.78       | Mixed-breed             | NA                         | 2.0       | 2.0     | Yes                            | No                                   | NA                      | NA                                | NA                                     | NA                                 | NA         | NA                      | NA                                      | NA                                                 | NA                                             | NA                     | Positive             | No                                         |
| 1341    | Yes      | Laboratory Workflow Deviation    | No           | No          | 15.92 | Female | Yes          | 16.84       | Mixed-breed             | NA                         | 1.0       | 1.0     | Yes                            | No                                   | NA                      | NA                                | NA                                     | NA                                 | NA         | NA                      | NA                                      | NA                                                 | NA                                             | NA                     | Positive             | No                                         |
| 1342    | Yes      | Laboratory Workflow Deviation    | No           | No          | 11.00 | Female | Yes          | 10.92       | Purebred                | American Eskimo Dog        | 4.0       | 2.0     | Yes                            | No                                   | NA                      | NA                                | NA                                     | NA                                 | NA         | NA                      | NA                                      | NA                                                 | NA                                             | NA                     | Negative             | No                                         |
| 1343    | Yes      | Enrollment or Clinical Deviation | No           | No          | 7.67  | Male   | Yes          | 29.06       | Mixed-breed             | NA                         | 1.5       | 0.5     | Yes                            | No                                   | NA                      | NA                                | NA                                     | NA                                 | NA         | NA                      | NA                                      | NA                                                 | NA                                             | NA                     | Positive             | No                                         |
| 1344    | No       | NA                               | No           | Yes         | 10.92 | Female | No           | 15.13       | Purebred                | Beagle                     | 2.0       | 1.0     | Yes                            | No                                   | Mammary Gland Carcinoma | NA                                | Localized/Regional                     | NA                                 | >5cm       | Ovary                   | NA                                      | Localized/Regional                                 | NA                                             | <=5cm                  | Negative             | No                                         |
| 1345    | No       | NA                               | Yes          | No          | 11.17 | Male   | Yes          | 30.06       | Purebred                | German Shorthaired Pointer | 0.0       | 0.0     | Yes                            | No                                   | Adrenal Gland           | NA                                | Localized/Regional                     | NA                                 | >5cm       | NA                      | NA                                      | NA                                                 | NA                                             | NA                     | Negative             | No                                         |
| 1346    | Yes      | Laboratory Workflow Deviation    | No           | No          | 8.00  | Male   | Yes          | 30.16       | Mixed-breed             | NA                         | 0.0       | 0.0     | Yes                            | No                                   | NA                      | NA                                | NA                                     | NA                                 | NA         | NA                      | NA                                      | NA                                                 | NA                                             | NA                     | Negative             | No                                         |
| 1347    | Yes      | Laboratory Workflow Deviation    | No           | No          | 9.92  | Female | Yes          | 38.28       | Mixed-breed             | NA                         | 4.0       | 2.0     | Yes                            | No                                   | NA                      | NA                                | NA                                     | NA                                 | NA         | NA                      | NA                                      | NA                                                 | NA                                             | NA                     | Negative             | No                                         |
| 1348    | Yes      | Laboratory Workflow Deviation    | No           | No          | 14.42 | Female | Yes          | 26.56       | Purebred                | Golden Retriever           | 3.0       | 2.0     | Yes                            | No                                   | NA                      | NA                                | NA                                     | NA                                 | NA         | NA                      | NA                                      | NA                                                 | NA                                             | NA                     | Positive             | No                                         |
| 1349    | Yes      | Laboratory Workflow Deviation    | No           | No          | 7.08  | Female | Yes          | 46.80       | Mixed-breed             | NA                         | 2.0       | 2.0     | Yes                            | No                                   | NA                      | NA                                | NA                                     | NA                                 | NA         | NA                      | NA                                      | NA                                                 | NA                                             | NA                     | Positive             | No                                         |
| 1350    | Yes      | Laboratory Workflow Deviation    | No           | No          | 7.75  | Male   | Yes          | 45.70       | Purebred                | Cane Corso                 | 2.0       | 2.0     | Yes                            | No                                   | NA                      | NA                                | NA                                     | NA                                 | NA         | NA                      | NA                                      | NA                                                 | NA                                             | NA                     | Positive             | No                                         |
| 1351    | Yes      | Laboratory Workflow Deviation    | No           | No          | NA    | NA     | NA           | NA          | NA                      | NA                         | 2.0       | 1.0     | Yes                            | No                                   | NA                      | NA                                | NA                                     | NA                                 | NA         | NA                      | NA                                      | NA                                                 | NA                                             | NA                     | Positive             | No                                         |
| 1352    | Yes      | Laboratory Workflow Deviation    | No           | No          | NA    | NA     | NA           | NA          | NA                      | NA                         | 2.0       | 2.0     | Yes                            | No                                   | NA                      | NA                                | NA                                     | NA                                 | NA         | NA                      | NA                                      | NA                                                 | NA                                             | NA                     | Negative             | No                                         |
| 1353    | Yes      | Enrollment or Clinical Deviation | No           | No          | 13.08 | Female | Yes          | 18.84       | Purebred                | Brittany                   | 2.0       | 1.5     | Yes                            | No                                   | NA                      | NA                                | NA                                     | NA                                 | NA         | NA                      | NA                                      | NA                                                 | NA                                             | NA                     | Negative             | No                                         |
| 1354    | Yes      | Laboratory Workflow Deviation    | No           | No          | 13.00 | Female | Yes          | 19.54       | Mixed-breed             | NA                         | 0.0       | 0.0     | Yes                            | No                                   | NA                      | NA                                | NA                                     | NA                                 | NA         | NA                      | NA                                      | NA                                                 | NA                                             | NA                     | Positive             | No                                         |
| 1355    | Yes      | Laboratory Workflow Deviation    | No           | No          | 10.00 | Female | Yes          | 39.78       | Mixed-breed             | NA                         | 3.0       | 2.0     | Yes                            | No                                   | NA                      | NA                                | NA                                     | NA                                 | NA         | NA                      | NA                                      | NA                                                 | NA                                             | NA                     | Positive             | No                                         |
| 1356    | Yes      | Laboratory Workflow Deviation    | No           | No          | 14.00 | Female | Yes          | 19.44       | Purebred                | Australian Shepherd        | 3.0       | 2.0     | Yes                            | No                                   | NA                      | NA                                | NA                                     | NA                                 | NA         | NA                      | NA                                      | NA                                                 | NA                                             | NA                     | Negative             | No                                         |
| 1357    | Yes      | Laboratory Workflow Deviation    | No           | No          | NA    | NA     | NA           | NA          | NA                      | NA                         | 3.5       | 2.0     | Yes                            | No                                   | NA                      | NA                                | NA                                     | NA                                 | NA         | NA                      | NA                                      | NA                                                 | NA                                             | NA                     | Negative             | No                                         |
| 1358    | Yes      | Laboratory Workflow Deviation    | No           | No          | NA    | NA     | NA           | NA          | NA                      | NA                         | 1.0       | 1.0     | Yes                            | No                                   | NA                      | NA                                | NA                                     | NA                                 | NA         | NA                      | NA                                      | NA                                                 | NA                                             | NA                     | Positive             | No                                         |

LEGEND

|                                |                                                                                                                                                              |                                                    |                                                                                                                                                                                                                      |
|--------------------------------|--------------------------------------------------------------------------------------------------------------------------------------------------------------|----------------------------------------------------|----------------------------------------------------------------------------------------------------------------------------------------------------------------------------------------------------------------------|
| Subject                        | Subject number (deidentified)                                                                                                                                | Cancer Diagnosed after Liquid Biopsy               | Whether subject was enrolled into the CANDiD study as "presumably cancer-free" but received a cancer diagnosis following a positive liquid biopsy result and subsequent workup                                       |
| Excluded                       | Whether or not subject was excluded from the training and testing sets                                                                                       | Cancer Type                                        | For subjects enrolled as "cancer-diagnosed", type of cancer diagnosed                                                                                                                                                |
| Reason for Exclusion           | Reason subject was excluded from the training and testing sets                                                                                               | Immunophenotype (Lymphoid Cancer)                  | Immunophenotype for subjects diagnosed with lymphoid cancer                                                                                                                                                          |
| Training Set                   | Whether or not subject was included in the training set                                                                                                      | Extent of Disease: Non-Lymphoid Cancer             | For subjects diagnosed with non-lymphoid cancer, extent of disease (Localized/Regional, Disseminated/Metastatic, Undetermined)                                                                                       |
| Testing Set                    | Whether or not subject was included in the testing set                                                                                                       | Extent of Disease: Lymphoid Cancer                 | For subjects diagnosed with lymphoid cancer, extent of disease (Localized/Regional, Disseminated/Metastatic, Undetermined)                                                                                           |
| Age                            | Subject age (years)                                                                                                                                          | Tumor Size                                         | For cancer-diagnosed subjects, the longest diameter (cm) of the largest lesion                                                                                                                                       |
| Sex                            | Subject sex                                                                                                                                                  | Cancer Type (Cancer #2)                            | For subjects with multiple concurrent primary cancers, the second cancer type                                                                                                                                        |
| Spay/Neuter                    | Whether or not subject was spayed/neutered                                                                                                                   | Immunophenotype (Cancer #2 if Lymphoid)            | Immunophenotype for subjects with multiple concurrent primary cancers in which the second diagnosis was lymphoid cancer                                                                                              |
| Weight (kg)                    | Subject weight (kg)                                                                                                                                          | Extent of Disease: Non-Lymphoid Cancer (Cancer #2) | For subjects with multiple concurrent primary cancers in which the second diagnosis was non-lymphoid cancer, extent of disease of the second cancer type (Localized/Regional, Disseminated/Metastatic, Undetermined) |
| Purebred or Mixed-Breed        | Whether subject was purebred or mixed-breed                                                                                                                  | Extent of Disease: Lymphoid Cancer (Cancer #2)     | For subjects with multiple concurrent primary cancers in which the second diagnosis was lymphoid cancer, extent of disease of the second cancer type (Localized/Regional, Disseminated/Metastatic, Undetermined)     |
| Breed (Purebred)               | Subject breed (for purebred subjects)                                                                                                                        | Tumor Size (Cancer #2)                             | For subjects with multiple concurrent primary cancers, the longest diameter (cm) of the largest lesion from the second cancer type                                                                                   |
| Hemolysis                      | Extent of hemolysis of sample received at the central lab, based on visual inspection of color: low (<1), medium (1-2.5), high (>2.5); not available         | Liquid Biopsy Result                               | Result of liquid biopsy testing (Positive, Negative, Indeterminate, Fail)                                                                                                                                            |
| Lipemia                        | Extent of lipemia of sample received at the central lab, based on visual inspection of extent of turbidity: low (0), medium (>0-1), high (>1), not available | CSO Prediction Of Hematological Malignancy         | Whether the subject received a Cancer Signal Origin (CSO) prediction of hematological malignancy                                                                                                                     |
| Cancer Diagnosis at Enrollment | Whether or not subject was enrolled into the CANDiD study as "cancer-diagnosed"                                                                              | NA                                                 | Not applicable                                                                                                                                                                                                       |
